# Supplementary material for: Thiophenol-mediated metal-free chemoselective conjugate reduction strategy for 3-alkylidene oxindoles
Source: Royal Society of Chemistry journal article supplement (doi:10.1039/d5ra09175f), 2026-01-01

## Thiophenol-mediated metal-free regioselective conjugate reduction strategy for 3-alkylidene Oxindoles

Baliram R. Patil, <sup>ab</sup> Chandrakant B. Nichinde, <sup>ab</sup> Amardipsing S. Girase, <sup>ab</sup> Suryakant S. Chaudhari, <sup>ab</sup> and Anil K. Kinage <sup>\*ab</sup>

---

<sup>a</sup>. Chemical Engineering and Process Development Division, Council of Scientific and Industrial Research-National Chemical Laboratory (CSIR-NCL), Pune 411008, India.

<sup>b</sup>. Academy of Scientific and Innovative Research (AcSIR), Ghaziabad-201002, India.

### Supporting Information

#### Contents.

|                                                                                      |     |
|--------------------------------------------------------------------------------------|-----|
| 1. General information.....                                                          | S2  |
| 2. General Procedure for the Synthesis of N-alkyl protected isatine derivatives..... | S3  |
| 3. General Procedure for the Synthesis starting materials.....                       | S3  |
| 4. General Procedure for the Synthesis of product <b>3</b> .....                     | S6  |
| 5. Synthesis of <b>2aD</b> .....                                                     | S6  |
| 6. References.....                                                                   | S7  |
| 7.Characterization data of products.....                                             | S8  |
| 8. NMR Spectra of Compounds.....                                                     | S23 |
| 9. HRMS Spectra of Compounds.....                                                    | S84 |

## 1. General information

Unless otherwise noted, materials obtained from commercial suppliers were used without further purification. The one pot reactions were carried out with anhydrous solvents in reaction tube. All solvents were purchased anhydrous. The reactions were monitored by analytical thin layer chromatography (TLC) visualizing under UV light (254 nm) or I<sub>2</sub> staining. <sup>1</sup>H NMR spectra, <sup>13</sup>C NMR spectra and <sup>19</sup>F NMR spectra was acquired in appropriate deuterated solvents at room temperature on Bruker: Ultrashield AV 400 MHz, Ultrashield AV 500 MHz spectrometer. Chemical shifts ( $\delta$ ) are reported for <sup>1</sup>H NMR in ppm from TMS as internal standard solvent signals as secondary standards. <sup>13</sup>C NMR from the residual solvent peak. <sup>1</sup>H NMR spectra are reported as follows: chemical shift ( $\delta$  ppm), multiplicity designated as *s* (singlet), *d* (doublet), *t* (triplet), *dd* (doublet of doublet), *q* (quartet), *m* (multiplet), etc., coupling constant (Hz). Data for <sup>13</sup>C NMR spectra are reported in terms of chemical shift ( $\delta$  ppm). HRMS data was recorded on a Thermo scientific Q-Exactive, Accela 1250 pump.

## 2. General Procedure for the Synthesis of N-alkyl protected isatin derivatives

*N*-protected isatin derivatives were synthesized starting from commercially available isatin and alkyl halides in the presence of potassium carbonate ( $K_2CO_3$ ) as a base in dimethylformamide (DMF) solvent. To a stirred solution of isatin (10 mmol, 1.0 eq.) and  $K_2CO_3$  (12 mmol, 1.2 eq.) in DMF, alkyl halides (12 mmol, 1.2 eq.) were added dropwise. The reaction mixture was stirred at room temperature for 12 hours, with progress monitored by thin-layer chromatography (TLC). Upon completion, the reaction was quenched with water (20 mL) and the product was extracted with dichloromethane ( $3 \times 20$  mL). The combined organic layers were washed with brine, dried over anhydrous  $Na_2SO_4$ , and concentrated under reduced pressure. The crude product was then purified by column chromatography on silica gel using a gradient of ethyl acetate/petroleum ether (10/90 to 20/80) to afford the *N*-protected isatin derivative.<sup>1</sup>

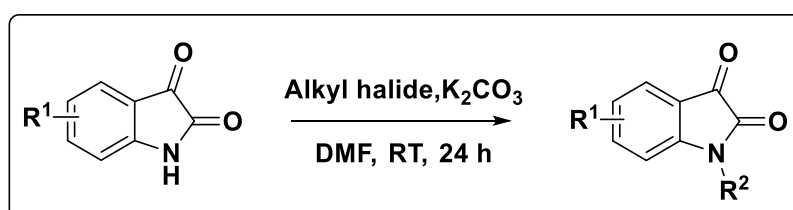

## 3. General Procedure for the Synthesis starting materials

### **A. Synthesis of Starting Material 1A.**

A mixture of isatin or substituted isatin (1 mmol, 1 equiv.) and ethyl cyanoacetate (1.1 mmol, 1.1 equiv.) in a 3:7 ethanol: water (4 mL) reaction mixture stirred at  $75^\circ C$  until the starting material was fully converted to the product (6-8 h), as monitored by thin-layer chromatography (TLC). Upon completion of the reaction, the mixture was filtered using a Büchner funnel, and the resulting residue was dried under reduced pressure at  $60^\circ C$ . The obtained product, was used directly in the next step without further purification.<sup>2</sup>

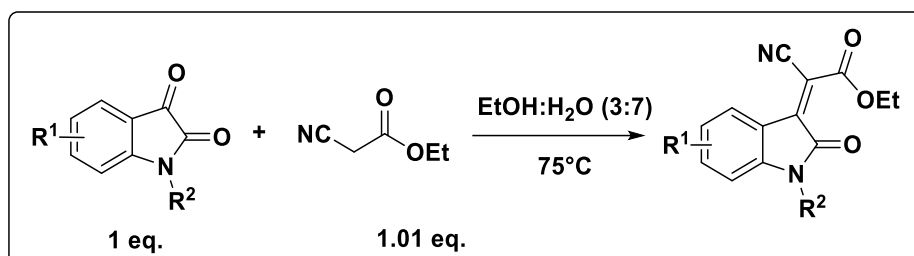

#### D. Synthesis of Starting Material 1B.

A mixture of isatin (0.5 mmol, 1 equiv.) and malononitrile (0.55 mmol, 1.1 equiv.) in EtOH (1 mL) was stirred at room temperature until isatin was totally converted to product (monitored by TLC). After completion of reaction solvent was removed under low pressure. Obtained residue was washed with cold methanol to get pure product.<sup>3</sup>

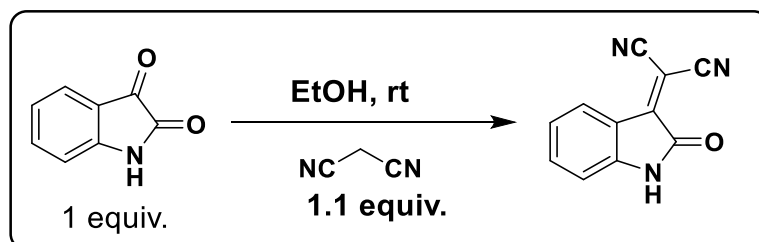

#### C. Synthesis of Starting Material 1C.

To a (25 ml) pair-shaped round bottom flask was sequentially added corresponding substituted isatin (0.5 mmol, 1equiv.), EtOH (5 mL), diethyl malonate (0.5 mmol) and piperidine (1.0 mmol). The mixture was stirred under reflux overnight. The resulting dark red mixture was evaporated to dryness under reduced pressure and the residue was directly purified by column chromatography on silica gel, (Pet ether/Ethyl acetate = 10/1) to afford the purified product.<sup>4</sup>

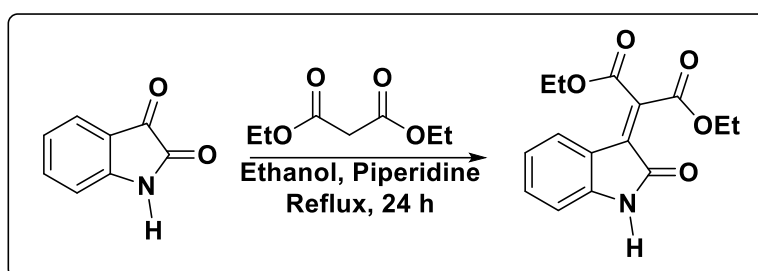

## B. Synthesis of Starting Material 1D.

To a solution of the isatin (0.5 mmol, 1equiv.) in methanol (5 mL) was added phosphonium ylide (1.2 equiv.) and the mixture was stirred at room temperature. After the completion of the reaction, the solvent was removed under reduced pressure and the residue was purified by Column chromatography, (20% ethyl acetate/ petroleum ether) directly to afford the purified product.<sup>5</sup>

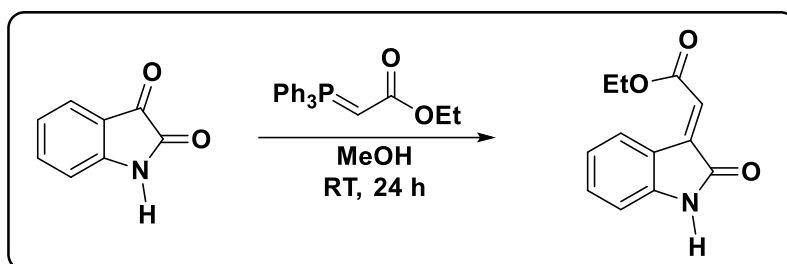

## E. Synthesis of Starting Material 1E.

To a solution of oxindole (2.0 g, 15.0 mmol, 1.0 equiv.) in EtOH (15.0 mL, 0.10 M) were added acetone (1.34 mL, 18.0 mmol, 1.2 equiv.) and piperidine (2.97 mL, 30.0 mmol, 2.0 equiv.). The reaction was then heated at reflux in an oil bath for 2.5 h. After cooling to 0 °C, the orange-colored precipitate formed was filtered, washed with cold EtOH and dried under vacuum. 3-(Propan-2-ylidene) indolin-2-one is obtained as a yellow solid (1.3 g, 7.51 mmol, 50%) and used in next step without further purification.<sup>6</sup>

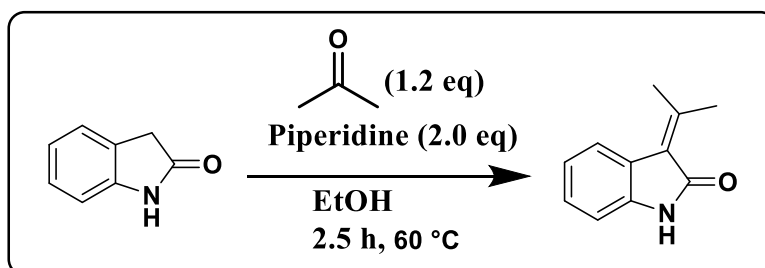

#### 4. General Procedure for the Synthesis of product 3.

**Procedure:** All reactions were carried out in oven dried reaction tube with magnetic stir bar, a solution of indolylidenecyanoester **(1)** derivative (1) (0.3 mmol, 1 equiv.) in DMSO (1 mL) solvent. To this solution Thiophenol **(2)** (0.6 mmol, 2 equiv.) was added. The reaction mixture was stirred at room temperature for 1 hour (or till complete reaction). Upon complete consumption of the starting material, as monitored by TLC, the reaction mixture was transferred into ice cold water and extracted with DCM (5 ml  $\times$  3). The organic layer was collected and dried over anhydrous  $\text{Na}_2\text{SO}_4$ . After evaporation under vacuum the crude product obtained was purified by silica gel column chromatography to afford product **3** (Petroleum ether/Ethyl acetate 75:30).

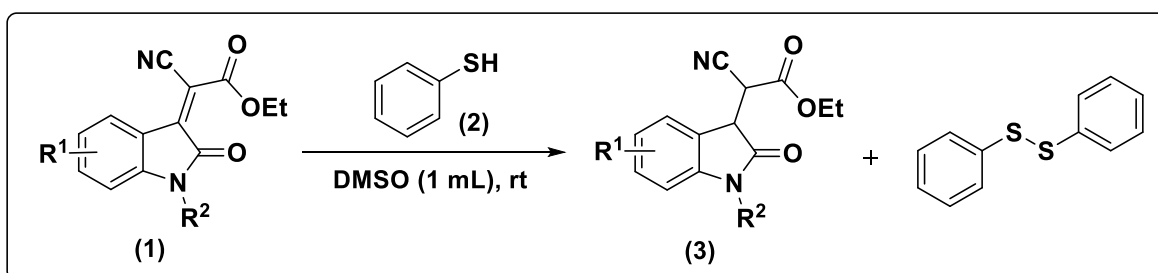

#### 5. Synthesis of 2aD

Benzenethiol **2a** (1.62 g, 15 mmol) was dissolved in  $\text{D}_2\text{O}$  (3.0 g, 150 mmol) and vigorously stirred for 2 hours at room temperature. The clear solution was concentrated *in vacuo* and resulted in **2aD** with 74% D incorporation which was determined by  $^1\text{H NMR}$ . Colourless oil,  $^1\text{H NMR}$  (400 MHz,  $\text{CHLOROFORM-d}$ )  $\delta$  ppm 7.08 - 7.50 (m, 5H), 3.39 (s, 0.26H).<sup>7</sup>

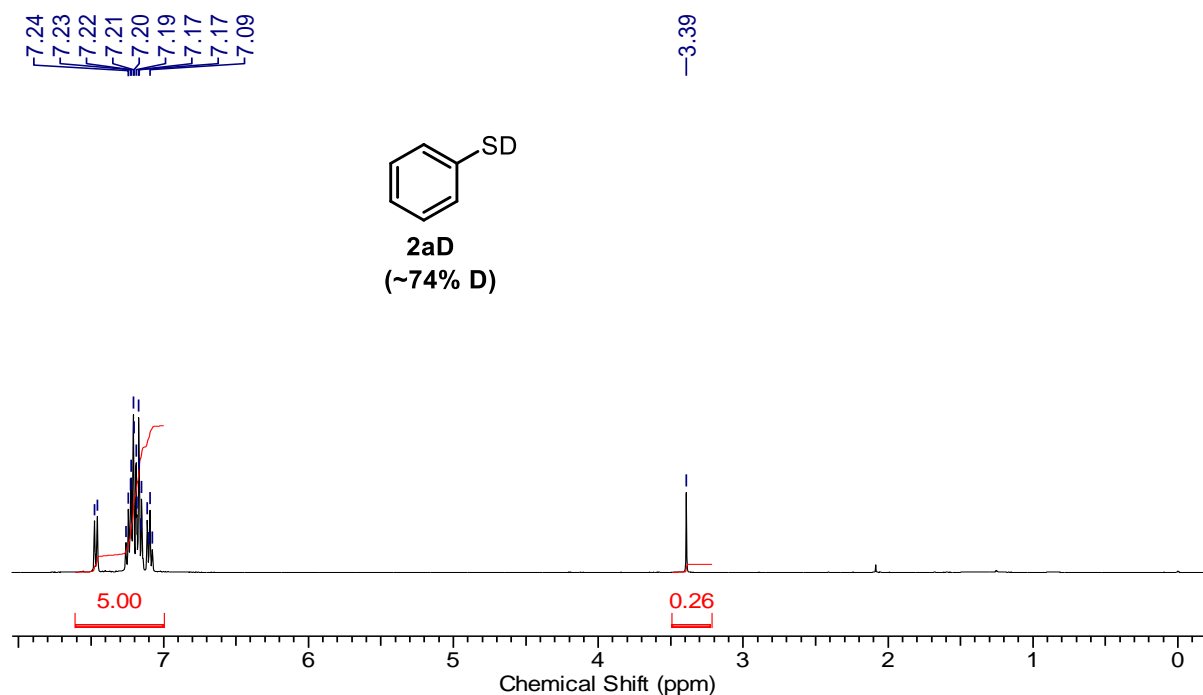

## 6. References

1. P. Zhao, Y. Li, G. Gao, S. Wang, Y. Yan, X. Zhan, Z. Liu, Z. Mao, S. Chen and L. Wang, *Eur. J. Med. Chem.*, 2014, **86**, 165–174; (b) Y.O. Teng, H.Y. Zhao, J. Wang, H. Liu, M.L. Gao, Y. Zhou, K.L. Han, Z.C. Fan, Y.M. Zhang, H. Sun, P. Yu, *Eur. J. Med. Chem.*, 2016, **112**, 145–156.
2. C. B. Nichinde, M. Bhati, A. S. Girase, B. R. Patil, S. S. Chaudhari, R. Krishna Gamidi, K. Joshi, A. K. Kinage, *Eur. J. Org. Chem.* 2025, **28**, e202401121.
3. B. R. Patil, C. B. Nichinde, S. S. Chaudhari, R. K. Gamidi and A. K. Kinage, *RSC Adv.* 2024, **14**, 2873–2877;
4. S. S. Chaudhari, C. B. Nichinde, B. R. Patil, A. S. Girase, A. K. Kinage, *ChemistrySelect*, 2025, **10**, e202405996.
5. S. S. Chaudhari, C. B. Nichinde, B. R. Patil, A. S. Girase, A. K. Kinage, *ChemistrySelect*, 2025, **10**, e202405996.
6. M. Pastor, M. Vayer, H. Weinstabl, N. Maulide, *J. Org. Chem.* 2022, **87**, 606–612.
7. S. Nie, A. Lu, E. L. Kuker and V. M. Dong, *J. Am. Chem. Soc.*, 2021, **143**, 6176–6184.

## 7.Characterization data of products

### Ethyl 2-cyano-2-(2-oxoindolin-3-yl) acetate (3Aa):

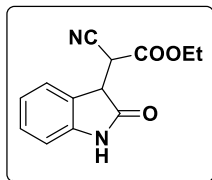

The titled compound was prepared by following the procedure A, obtained as a Solid, 67 mg, 92% yield, mp= 105–110°C; column chromatography on silica gel (petroleum ether/EtOAc 70:30); (Diastereomeric mixture, ratio 1:1.20) **<sup>1</sup>H NMR** (400 MHz, CHLOROFORM-d) δ ppm 9.25 (br. s., 1H), 9.21 (s, 1H), 7.42 (d, J=7.50 Hz, 1H), 7.20 (td, J=7.72, 4.44 Hz, 2H), 7.13 (d, J=7.50 Hz, 1H), 6.97 (td, J=7.19, 3.38 Hz, 2H), 6.86 (t, J=8.32 Hz, 2H), 4.36 (d, J=3.25 Hz, 1H), 4.32 (q, J=7.13 Hz, 2H), 4.28 (d, J=3.88 Hz, 1H), 4.08 (d, J=3.88 Hz, 1H), 3.98 - 4.05 (m, 2H), 3.91 (d, J=3.13 Hz, 1H), 1.30 (t, J=7.13 Hz, 3H), 1.00 (t, J=7.13 Hz, 3H); **<sup>13</sup>C NMR** (101 MHz, CHLOROFORM-d) δ ppm 175.7 [C=O amide]; 164.5, 163.3 [C=O ester]; 142.0, 141.9 [C]; 129.6, 129.4 [CH]; 124.6 [CH]; 124.2, 124.0 [C]; 123.9 [CH]; 123.0, 122.8 [CH]; 115.2, 113.4 [CN]; 110.7, 110.4 [CH]; 63.7, 63.2 [CH<sub>2</sub>]; 45.2 [CH]; 38.7, 37.6 [CH]; 13.9, 13.5 [CH<sub>3</sub>]; **HRMS** (ESI) calcd for: C<sub>13</sub>H<sub>13</sub>O<sub>3</sub>N<sub>2</sub>, [ M + H]<sup>+</sup> 245.0921 found: 245.0919.

### Ethyl 2-cyano-2-(5-methyl-2-oxoindolin-3-yl) acetate (3Ab):

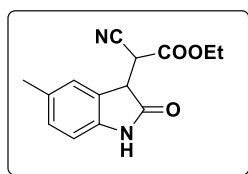

The titled compound was prepared by following the procedure A, obtained as a Solid, 70 mg, 90% yield, mp = 114–118°C; column chromatography on silica gel (petroleum ether/EtOAc 70:30); (Diastereomeric mixture, ratio 1:1.20); **<sup>1</sup>H NMR** (400 MHz, CHLOROFORM-d) δ ppm 9.22 (br. s., 2H), 7.30 (s, 1H), 7.03 - 7.12 (m, 2H), 7.01 (s, 1H), 6.83 (t, J=8.38 Hz, 2H), 4.42 - 4.45 (m, 1H), 4.37 - 4.42 (m, 2H), 4.34 (d, J=3.88 Hz, 1H), 4.12 - 4.14 (m, 1H), 4.06 - 4.11 (m, 2H), 3.94 (d, J=3.13 Hz, 1H), 2.32 (s, 3H), 2.30 (s, 3H), 1.39 (t, J=7.13 Hz, 3H), 1.09 (t, J=7.13 Hz, 3H); **<sup>13</sup>C NMR** (101 MHz, CHLOROFORM-d) δ ppm 175.7 [C=O amide]; 164.6, 163.3 [C=O ester]; 139.5, 139.3 [C]; 132.6, 132.5 [C]; 129.9, 129.7 [CH]; 125.3, 124.6 [CH]; 124.2, 124.1 [C]; 115.3, 113.5 [CN]; 110.3, 110.1 [CH]; 63.6, 63.2 [CH<sub>2</sub>]; 45.3 [CH]; 38.8, 37.6 [CH]; 21.0, 20.9 [CH<sub>3</sub>]; 13.9, 13.5 [CH<sub>3</sub>]; **HRMS** (ESI) calcd for: C<sub>14</sub>H<sub>15</sub>O<sub>3</sub>N<sub>2</sub>, [ M + H]<sup>+</sup> 259.1077, found: 259.1064.

### Ethyl 2-cyano-2-(5-methoxy-2-oxoindolin-3-yl) acetate (3Ac):

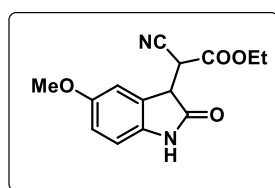

The titled compound was prepared by following the procedure A, obtained as a Solid, 73 mg, 89% yield, mp = 112–114°C; column chromatography on silica gel (petroleum ether/EtOAc 68:32); (Diastereomeric mixture, ratio 1:1); **<sup>1</sup>H NMR** (400 MHz, CHLOROFORM-d) δ ppm 9.16 (br. s., 1H), 9.12 (br. s., 1H), 7.02 (s, 1H), 6.75 - 6.81 (m, 2H), 6.69 - 6.75 (m, 3H), 4.34 (dd, J=7.38, 2.38 Hz, 2H), 4.27 - 4.32 (m, 2H), 4.01 - 4.06 (m, 3H), 3.89 (s, 1H), 3.69 (s, 3H), 3.67 (s, 3H), 1.30 (t, J=7.13 Hz, 3H), 1.04 (t, J=7.13 Hz, 3H); **<sup>13</sup>C NMR** (101 MHz, CHLOROFORM-d) δ ppm , 175.5 [C=O amide]; 164.5, 163.3 [C=O ester]; 155.9, 155.8 [C]; 135.3, 135.2 [C]; 125.4, 125.3 [C]; 114.1, 113.9 [CH]; 115.2, 113.4 [CN]; 111.9, 111.0 [CH]; 110.9, 110.8 [CH]; 63.7, 63.2 [CH<sub>2</sub>]; 55.7, 55.6 [CH<sub>3</sub>]; 45.6 [CH]; 38.8, 37.6 [CH]; 13.9, 13.5 [CH<sub>3</sub>]; **HRMS** (ESI) calcd for: C<sub>14</sub>H<sub>15</sub>O<sub>4</sub>N<sub>2</sub>, [ M + H]<sup>+</sup> 275.1026, found: 275.1014.

### Ethyl 2-cyano-2-(5,7-dimethyl-2-oxoindolin-3-yl) acetate (3Ad):

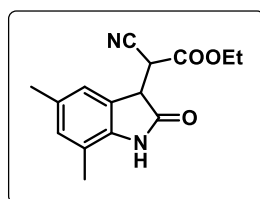

The titled compound was prepared by following the procedure A, obtained as a Solid, 67 mg, 82% yield, mp = 118–120°C; column chromatography on silica gel (petroleum ether/EtOAc 74:26); (Diastereomeric mixture, ratio 1:1); **<sup>1</sup>H NMR** (400 MHz, CHLOROFORM-d) δ ppm 10.39 (br. s., 1H), 10.29 (br. s., 1H), 6.97 (d, J=5.00 Hz, 1H), 6.80 (t, J=6.32 Hz, 2H), 6.68 (d, J=5.00 Hz, 1H), 4.38 (d, J=3.38 Hz, 1H), 4.33 (d, J=3.63 Hz, 2H), 4.30 (d, J=3.13 Hz, 1H), 4.00 - 4.12 (m, 2H), 3.95 (d, J=7.35 Hz, 1H), 3.86 (s, 1H), 2.19 (s, 6H), 2.15 (s, 6H), 1.30 (t, J=7.16 Hz, 3H), 1.04 (t, J=7.16 Hz, 3H); **<sup>13</sup>C NMR** (101 MHz, CHLOROFORM-d) δ ppm 175.1, 175.1 [C=O amide]; 164.5, 163.1 [C=O ester]; 138.7, 138.6 [C]; 131.4, 131.3 [C]; 131.0, 130.8 [CH]; 123.6, 123.4 [C]; 122.0, 121.4 [CH]; 119.4, 119.16 [C]; 115.1, 113.4 [CN]; 63.1, 62.5 [CH<sub>2</sub>]; 45.3 [CH]; 38.6, 37.5 [CH]; 20.6, 20.5 [CH<sub>3</sub>]; 16.2, 16.1 [CH<sub>3</sub>]; 13.6, 13.2 [CH<sub>3</sub>]; **HRMS** (ESI) calcd for: C<sub>15</sub>H<sub>17</sub>O<sub>3</sub>N<sub>2</sub>, [ M + H]<sup>+</sup> 273.1234, found: 273.1232.

### Ethyl 2-(5-chloro-2-oxoindolin-3-yl)-2-cyanoacetate (3Ae):

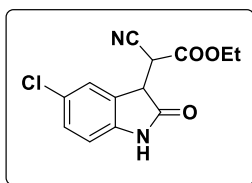

The titled compound was prepared by following the procedure A, obtained as a Solid, 73 mg, 88% yield, mp = 122–126°C; column chromatography on silica gel (petroleum ether/EtOAc 68:32); (Diastereomeric mixture, ratio 1:1.20);  $^1\text{H NMR}$  (400 MHz, CHLOROFORM-*d*)  $\delta$  ppm 9.18 (br. s., 1H), 9.12 (br. s., 1H), 7.41 (s, 1H), 7.15 - 7.24 (m, 2H), 7.13 (s, 1H), 6.81 (t, *J*=8.32 Hz, 2H), 4.31 - 4.39 (m, 3H), 4.29 (d, *J*=3.50 Hz, 1H), 4.01 - 4.12 (m, 3H), 3.88 - 3.95 (m, 1H), 1.32 (t, *J*=7.13 Hz, 3H), 1.08 (t, *J*=7.13 Hz, 3H);  $^{13}\text{C NMR}$  (101 MHz, CHLOROFORM-*d*)  $\delta$  ppm 175.6, 175.6 [C=O amide]; 164.6, 163.4 [C=O ester]; 140.9, 140.7 [C]; 130.1, 129.8 [CH]; 128.8, 128.6 [C]; 126.2, 126.0 [C]; 125.6, 124.8 [CH]; 115.2, 113.5 [CN]; 112.0, 111.8 [CH]; 64.3, 63.9 [CH<sub>2</sub>]; 45.6, 45.5 [CH]; 38.9, 37.7 [CH]; 14.2, 13.9 [CH<sub>3</sub>]; **HRMS** (ESI) calcd for: C<sub>13</sub>H<sub>12</sub>O<sub>3</sub>N<sub>2</sub>Cl, [M + H]<sup>+</sup> 279.0531, found: 279.0529.

### Ethyl 2-(5-bromo-2-oxoindolin-3-yl)-2-cyanoacetate (3Af):

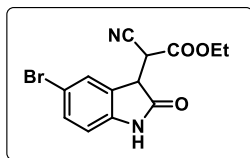

The titled compound was prepared by following the procedure A, obtained as a Solid, 82 mg, 85% yield, mp = 130–132°C; column chromatography on silica gel (petroleum ether/EtOAc 66:34); (Diastereomeric mixture, ratio 1:1);  $^1\text{H NMR}$  (400 MHz, CHLOROFORM-*d*)  $\delta$  ppm 8.64 (br. s., 1H), 8.60 (br. s., 1H), 7.57 (s, 1H), 7.33 - 7.41 (m, 2H), 7.29 (s, 1H), 6.76 (t, *J*=8.75 Hz, 2H), 4.33 - 4.41 (m, 2H), 4.33 (d, *J*=3.25 Hz, 1H), 4.27 (d, *J*=3.63 Hz, 1H), 4.09 - 4.13 (m, 2H), 4.05 - 4.09 (m, 1H), 3.91 (d, *J*=3.25 Hz, 1H), 1.34 (t, *J*=7.13 Hz, 3H), 1.10 (t, *J*=7.13 Hz, 3H);  $^{13}\text{C NMR}$  (101 MHz, CHLOROFORM-*d*)  $\delta$  ppm 174.9, 174.8 [C=O amide]; 164.3, 163.0 [C=O ester]; 140.9, 140.8 [C]; 132.8, 132.6 [CH]; 128.3, 127.3 [CH]; 126.3, 126.1 [C]; 115.9, 115.6 [C]; 114.9, 113.1 [CN]; 112.0, 111.8 [CH]; 64.1, 63.7 [CH<sub>2</sub>]; 45.2, 45.1 [CH]; 38.7, 37.4 [CH]; 14.0, 13.7 [CH<sub>3</sub>]; **HRMS** (ESI) calcd for: C<sub>13</sub>H<sub>12</sub>O<sub>3</sub>N<sub>2</sub>Br, [M + H]<sup>+</sup> 323.0026, found: 323.0022.

**Ethyl 2-cyano-2-(5-fluoro-2-oxoindolin-3-yl) acetate (3Ag):**

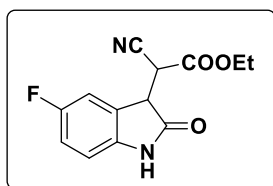

The titled compound was prepared by following the procedure A, obtained as a Solid, 70 mg, 88% yield, mp = 108–110°C; column chromatography on silica gel (petroleum ether/EtOAc 70:30); (Diastereomeric mixture, ratio 1:1); **<sup>1</sup>H NMR** (400 MHz, CHLOROFORM-d) δ ppm 9.32 (s, 1H), 9.26 (s, 1H), 7.24 - 7.30 (m, 1H), 6.96-7.04 (m, 3H), 6.90 (td, J=8.63, 4.25 Hz, 2H), 4.40 - 4.48 (m, 3H), 4.38 (d, J=3.75 Hz, 1H), 4.10 - 4.19 (m, 3H), 4.00 (d, J=2.75 Hz, 1H), 1.39 (t, J=7.19 Hz, 3H), 1.15 (t, J=7.13 Hz, 3H); **<sup>13</sup>C NMR** (101 MHz, CHLOROFORM-d) δ ppm 175.8, 175.7 [C=O amide]; 164.4 163.3 [C=O ester]; 160.3, 157.8 (d, J = 241.9 Hz), [C-F] 138.1, 138.0 [C]; 125.8, 125.5 [C]; 116.4, 115.9 (d, J = 7.8 Hz) [CH]; 115.0, 113.3 [CN]; 113.1, 112.1 (d, J = 24.1 Hz) [CH]; 111.5, 111.2 (d, J = 20.7 Hz), [CH]; 64.0, 63.6 [CH<sub>2</sub>]; 45.7, 45.6, [CH]; 38.7, 37.6 [CH]; 14.0, 13.7 [CH<sub>3</sub>]; **<sup>19</sup>F NMR** (377 MHz, CHLOROFORM-d) δ ppm -119.15 (s, 1F), -119.23 (s, 1F); **HRMS** (ESI) calcd for: C<sub>13</sub>H<sub>12</sub>O<sub>3</sub>N<sub>2</sub>F, [ M + H]<sup>+</sup> 263.0826, found: 263.0828.

**Ethyl 2-cyano-2-(5-iodo-2-oxoindolin-3-yl) acetate (3Ah):**

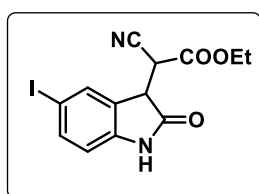

The titled compound was prepared by following the procedure A, obtained as a Solid, 86 mg, 78% yield, mp = 135–138°C; column chromatography on silica gel (petroleum ether/EtOAc 65:35); (Diastereomeric mixture, ratio 1:1); **<sup>1</sup>H NMR** (400 MHz, CHLOROFORM-d) δ ppm 8.64 (br. s., 1H), 8.60 (br. s., 1H), 7.72 (s, 1H), 7.55 (d, J=7.25 Hz, 2H), 7.44 (s, 1H), 6.66 (t, J=8.76 Hz, 2H), 4.36 (qd, J=7.19, 3.94 Hz, 2H), 4.31 (d, J=3.38 Hz, 1H), 4.26 (d, J=3.63 Hz, 1H), 4.05 - 4.14 (m, 3H), 3.90 (d, J=2.88 Hz, 1H), 1.34 (t, J=7.13 Hz, 3H), 1.10 (t, J=7.19 Hz, 3H); **<sup>13</sup>C NMR** (101 MHz, CHLOROFORM-d) δ ppm 174.6, 174.5 [C=O amide]; 164.3, 163.0 [C=O ester]; 141.6, 141.4 [C]; 138.6, 138.5 [CH]; 133.7, 132.8 [CH]; 126.6, 126.4 [C]; 114.9, 113.1 [CN]; 112.5, 112.3 [CH]; 85.6, 85.3 [C]; 64.1, 63.6 [CH<sub>2</sub>]; 45.0, 44.8 [CH]; 38.7, 37.4 [CH]; 14.0, 13.7 [CH<sub>3</sub>]; **HRMS** (ESI) calcd for: C<sub>13</sub>H<sub>12</sub>O<sub>3</sub>N<sub>2</sub>I, [ M + H]<sup>+</sup> 370.9887, found: 370.9888.

### Ethyl 2-(6-chloro-2-oxoindolin-3-yl)-2-cyanoacetate (3Ai):

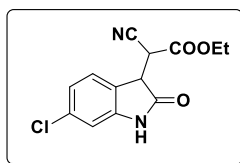

The titled compound was prepared by following the procedure A, obtained as a Solid, 73 mg, 87% yield, mp = 126–130°C; column chromatography on silica gel (petroleum ether/EtOAc 70:30); (Diastereomeric mixture, ratio 1:1.20);  $^1\text{H NMR}$  (400 MHz, CHLOROFORM-*d*)  $\delta$  ppm 8.75 (br. s., 2H), 7.45 (d,  $J=8.00$  Hz, 1H), 7.16 (d,  $J=8.00$  Hz, 1H), 7.06 (td,  $J=6.25, 1.75$  Hz, 2H), 6.98 (d,  $J=1.75$  Hz, 1H), 6.95 (d,  $J=1.75$  Hz, 1H), 4.42 - 4.46 (m, 1H), 4.38 - 4.42 (m, 2H), 4.33 (d,  $J=3.75$  Hz, 1H), 4.09 - 4.19 (m, 3H), 3.94 (d,  $J=3.00$  Hz, 1H), 1.40 (t,  $J=7.19$  Hz, 3H), 1.16 (t,  $J=7.13$  Hz, 3H);  $^{13}\text{C NMR}$  (101 MHz, CHLOROFORM-*d*)  $\delta$  ppm 174.97 [C=O amide]; 164.1 (s), 162.8 [C=O ester]; 142.7, 142.5 [C]; 135.3, 135.1 [C]; 125.6, 124.8 [CH]; 122.9, 122.7 [CH]; 122.3, 122.1 [C]; 114.7, 112.9 [CN]; 111.0, 110.7 [CH]; 63.6, 63.2 [CH<sub>2</sub>]; 44.5, 44.4 [CH]; 38.5, 37.1 [CH]; 13.7, 13.4 [CH<sub>3</sub>]; **HRMS** (ESI) calcd for: C<sub>13</sub>H<sub>12</sub>O<sub>3</sub>N<sub>2</sub>ClNa, [ M + Na]<sup>+</sup> 301.0350, found: 301.0353.

### Ethyl 2-(7-bromo-2-oxoindolin-3-yl)-2-cyanoacetate (3Aj):

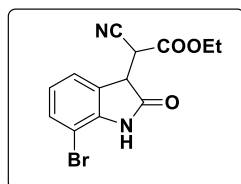

The titled compound was prepared by following the procedure A, obtained as a Solid, 85 mg, 89% yield, mp = 132–134°C; column chromatography on silica gel (petroleum ether/EtOAc 65:35); (Diastereomeric mixture, ratio 1:1.30)  $^1\text{H NMR}$  (400 MHz, CHLOROFORM-*d*)  $\delta$  ppm 8.87 (br. s., 1H), 8.79 (br. s., 1H), 7.40 (d,  $J=7.50$  Hz, 1H), 7.35 (dd,  $J=8.19, 5.32$  Hz, 2H), 7.11 (d,  $J=7.50$  Hz, 1H), 6.90 (td,  $J=7.85, 2.94$  Hz, 2H), 4.39 (d,  $J=3.13$  Hz, 1H), 4.28 - 4.35 (m, 2H), 4.22 (d,  $J=3.63$  Hz, 1H), 4.05 - 4.10 (m, 1H), 3.96 - 4.05 (m, 3H), 1.31 (t,  $J=7.13$  Hz, 3H), 1.03 (t,  $J=7.13$  Hz, 3H);  $^{13}\text{C NMR}$  (101 MHz, CHLOROFORM-*d*)  $\delta$  ppm 174.4, 174.3 [C=O amide]; 164.32, 162.94 [C=O ester]; 141.4, 141.3 [C]; 132.5, 132.2 [CH]; 125.5, 125.3 [C]; 124.3, 124.1 [CH]; 123.7, 122.9 [CH]; 115.0, 113.1 [CN]; 103.5, 103.2 [C]; 63.9, 63.4 [CH<sub>2</sub>]; 46.3, 46.2 [CH]; 38.7, 37.5 [CH]; 13.9, 13.5 [CH<sub>3</sub>]; **HRMS** (ESI) calcd for: C<sub>13</sub>H<sub>12</sub>O<sub>3</sub>N<sub>2</sub>Br, [ M + H]<sup>+</sup> 323.0026, found: 323.0013.

**ethyl 2-cyano-2-(7-fluoro-2-oxoindolin-3-yl) acetate (3Ak):**

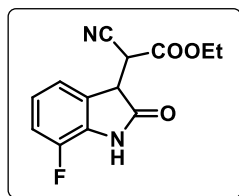

The titled compound was prepared by following the procedure A, obtained as a Solid, 68 mg, 86% yield, mp = 128–130°C; column chromatography on silica gel (petroleum ether/EtOAc 70:30); (Diastereomeric mixture, ratio 1:1) **<sup>1</sup>H NMR** (400 MHz, CHLOROFORM-d) δ ppm 10.67 (br. s., 4 H), 10.52 (br. s., 5 H), 7.20 (d, J=7.25 Hz, 5 H), 6.87 - 7.04 (m, 23 H), 4.40 (d, J=3.25 Hz, 1H), 4.29 - 4.37 (m, 3H), 4.01 - 4.11 (m, 3H), 3.93 (d, J=3.25 Hz, 1H), 1.31 (t, J=7.13 Hz, 3H), 1.05 (t, J=7.13 Hz, 3H); **<sup>13</sup>C NMR** (101 MHz, CHLOROFORM-d) δ ppm 174.9 [C=O amide]; 164.5, 163.1 [C=O ester]; 148.3, 146.0 (d, J = 244.9 Hz), [C-F]; 129.5, 129.3 [C]; 127.0, 126.7 [C]; 123.9, 123.7 (d, J = 11.9 Hz), [CH]; 120.6, 119.8 (d, J = 22.3 Hz), [CH]; 117.0, 116.6 (d, J = 3.5 Hz), [CH]; 115.1, 113.2 [CN]; 63.9, 63.5 [CH<sub>2</sub>]; 45.6, 45.4 [CH]; 38.8, 37.6 [CH]; 14.0, 13.6 [CH<sub>3</sub>]; **<sup>19</sup>F NMR** (377 MHz, CHLOROFORM-d) δ ppm -132.54 (s, 1F), -132.84 (s, 1F); **HRMS** (ESI) calcd for: C<sub>13</sub>H<sub>12</sub>O<sub>3</sub>N<sub>2</sub>F, [ M + H]<sup>+</sup> 263.0826, found: 263.0827.

**Ethyl 2-(7-chloro-2-oxoindolin-3-yl)-2-cyanoacetate (3Al):**

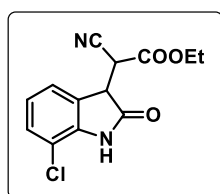

The titled compound was prepared by following the procedure A, obtained as a Solid, 72 mg, 87% yield, mp = 134–138°C; column chromatography on silica gel (petroleum ether/EtOAc 68:32); (Diastereomeric mixture, ratio 1:1.30) **<sup>1</sup>H NMR** (400 MHz, CHLOROFORM-d) δ ppm 9.09 (br. s., 1H), 9.01 (br. s., 1H), 7.44 (d, J=7.38 Hz, 1H), 7.25 - 7.33 (m, 2H), 7.15 (d, J=7.50 Hz, 1H), 7.03 (t, J=7.88 Hz, 2H), 4.47 (d, J=3.13 Hz, 1H), 4.39 - 4.46 (m, 2H), 4.38 (d, J=3.63 Hz, 1H), 4.27 (d, J=3.00 Hz, 1H), 4.12 (d, J=7.50 Hz, 1H), 4.03 - 4.10 (m, 2H), 1.39 (t, J=7.13 Hz, 3H), 1.11 (t, J=7.13 Hz, 3H); **<sup>13</sup>C NMR** (101 MHz, CHLOROFORM-d) δ ppm 174.8, 174.7 [C=O amide]; 164.4, 163.0 [C=O ester]; 139.9, 139.7 [C]; 129.8, 129.5 [CH]; 125.7, 125.5 [C]; 124.1, 123.9 [CH]; 123.2, 122.4 [CH]; 115.9, 115.6 [C]; 115.1, 113.2 [CN]; 64.0, 63.5 [CH<sub>2</sub>]; 46.1, 46.0 [CH]; 38.7, 37.6 [CH]; 14.0, 13.6 [CH<sub>3</sub>]; **HRMS** (ESI) calcd for: C<sub>13</sub>H<sub>12</sub>O<sub>3</sub>N<sub>2</sub>ClNa, [ M + Na]<sup>+</sup> 301.0350, found: 301.0353.

**Ethyl 2-cyano-2-(2-oxo-5-(trifluoromethoxy) indolin-3-yl) acetate (3Am):**

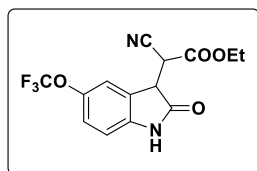

The titled compound was prepared by following the procedure A, obtained as a Solid, 89 mg, 91% yield, mp = 140–142°C; column chromatography on silica gel (petroleum ether/EtOAc 60:40); (Diastereomeric mixture, ratio 1:1)  $^1\text{H NMR}$  (400 MHz, *CHLOROFORM-d*)  $\delta$  ppm 9.17 (br. s., 1H), 9.12 (br. s., 1H), 7.41 (s, 1H), 7.19 (d,  $J=8.50$  Hz, 2H), 7.14 (s, 1H), 6.96 (t,  $J=8.63$  Hz, 2H), 4.39 - 4.45 (m, 3H), 4.38 (d,  $J=3.75$  Hz, 1H), 4.20 (d,  $J=3.75$  Hz, 1H), 4.15 (qd,  $J=7.15$ , 2.31 Hz, 2H), 4.02 (d,  $J=3.38$  Hz, 1H),, 1.39 (t,  $J=7.13$  Hz, 3H), 1.15 (t,  $J=7.13$  Hz, 3H);  $^{13}\text{C NMR}$  (101 MHz, *CHLOROFORM-d*)  $\delta$  ppm 175.5, 175.4 [C=O amide]; 164.3, 163.1[C=O ester]; 144.9, 144.7 [C-O] 140.7, 140.6 [C]; 125.7, 125.4 [C]; 123.0, 122.8 [CH]; 121.7, 119.1[-OCF<sub>3</sub>] 118.9, 118.2[CH]; 114.8, 113.1[CN]; 111.3, 111.1 [CH]; 64.1, 63.6 [CH<sub>2</sub>]; 45.5, 45.3 [CH]; 38.6, 37.4 [CH]; 13.9, 13.6 [CH<sub>3</sub>];  $^{19}\text{F NMR}$  (376 MHz, *CHLOROFORM-d*)  $\delta$  ppm -58.42 (s, 1F), -58.46 (s, 1F).; **HRMS** (ESI) calcd for: C<sub>14</sub>H<sub>12</sub>O<sub>4</sub>N<sub>2</sub>F<sub>3</sub>, [ M + H]<sup>+</sup> 329.0744, found: 329.0734.

**Ethyl 2-cyano-2-(2-oxo-7-(trifluoromethyl) indolin-3-yl) acetate (3An):**

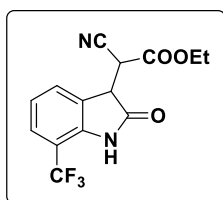

The titled compound was prepared by following the procedure A, obtained as a Solid, 84 mg, 90% yield, mp = 148–150°C; column chromatography on silica gel (petroleum ether/EtOAc 60:40); (Diastereomeric mixture, ratio 1:1.50)  $^1\text{H NMR}$  (400 MHz, *CHLOROFORM-d*)  $\delta$  ppm 8.87 (br. s., 1H), 8.82 (br. s., 1H), 7.66 (d,  $J=7.50$  Hz, 1H), 7.42 - 7.49 (m, 2H), 7.38 (d,  $J=7.50$  Hz, 1H), 7.12 (t,  $J=7.75$  Hz, 2H), 4.42 (d,  $J=3.13$  Hz, 1H), 4.35 (q,  $J=7.13$  Hz, 2H), 4.30 (d,  $J=3.88$  Hz, 1H), 4.15 (d,  $J=3.75$  Hz, 1H), 3.99 - 4.07 (m, 2H), 3.92 (d,  $J=3.00$  Hz, 1H), 1.33 (t,  $J=7.13$  Hz, 3H), 1.01 (t,  $J=7.13$  Hz, 3H);  $^{13}\text{C NMR}$  (101 MHz, *CHLOROFORM-d*)  $\delta$  ppm 174.9, 174.8 [C=O amide]; 164.3, 162.8 [C=O ester]; 139.4, 139.1 [C]; 128.4, 127.5 [CH]; 126.5, [CH]; 125.9, 125.7 [C]; 123.0, 122.8 [CH]; 124.9, 122.2 (q,  $J=3.8$  Hz), [C-CF<sub>3</sub>] 115.0 [CN]; 113.0 [-CF<sub>3</sub>], 64.0, 63.5 [CH<sub>2</sub>]; 44.3, 44.2 [CH]; 38.5, 37.4 [CH]; 13.9, 13.5 [CH<sub>3</sub>];  $^{19}\text{F NMR}$  (377 MHz, *CHLOROFORM-d*)  $\delta$  ppm -60.92 (s, 1F), -61.02 (s, 1F); **HRMS** (ESI) calcd for: C<sub>14</sub>H<sub>12</sub>O<sub>3</sub>N<sub>2</sub>F<sub>3</sub>, [ M + H]<sup>+</sup> 313.0795, found: 313.0781.

**Methyl 2-cyano-2-(2-oxoindolin-3-yl) acetate (3Ao):**

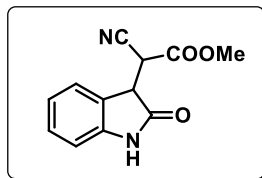

The titled compound was prepared by following the procedure, obtained as a Solid, 63 mg, 91% yield, mp = 98–102°C; column chromatography on silica gel (petroleum ether/EtOAc 75:25); (Diastereomeric mixture, ratio 1:1)  $^1\text{H NMR}$  (400 MHz, CHLOROFORM-*d*)  $\delta$  ppm 9.32 (br. s., 1H), 9.25 (s, 1H), 7.38 (d, *J*=7.50 Hz, 1H), 7.15 - 7.23 (m, 2H), 7.10 (d, *J*=7.50 Hz, 1H), 6.96 (td, *J*=7.35, 5.07 Hz, 2H), 6.87 (t, *J*=8.00 Hz, 2H), 4.37 (d, *J*=3.50 Hz, 1H), 4.30 (d, *J*=4.00 Hz, 1H), 4.06 (d, *J*=3.75 Hz, 1H), 3.91 (d, *J*=3.38 Hz, 1H), 3.85 (s, 3H), 3.58 (s, 3H);  $^{13}\text{C NMR}$  (101 MHz, CHLOROFORM-*d*)  $\delta$  ppm 174.9 [C=O amide]; 165.0, 163.8 [C=O ester]; 142.4, 142.4 [C]; 129.2, 129.0 [CH]; 124.1, 124.00 [C]; 123.7, 123.5 [CH]; 122.2, 122.1 [CH]; 114.9, 113.3 [CN]; 110.4, 110.2 [CH]; 53.7, 53.3 [CH]; 45.0, 44.9 [CH]; 38.3, 37.3 [CH<sub>3</sub>]; **HRMS** (ESI) C<sub>12</sub>H<sub>10</sub>O<sub>3</sub>N<sub>2</sub>Na, [M + Na]<sup>+</sup> 253.0584, found: 253.0579.

**Ethyl 2-cyano-2-(1-methyl-2-oxoindolin-3-yl) acetate (3Ap):**

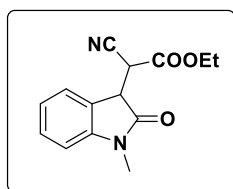

The titled compound was prepared by following the procedure A, obtained as a Solid, 72 mg, 93% yield, mp = 96–98°C; column chromatography on silica gel (petroleum ether/EtOAc 75:25); (Diastereomeric mixture, ratio 1:1)  $^1\text{H NMR}$  (400 MHz, CHLOROFORM-*d*)  $\delta$  ppm 7.53 (d, *J*=7.38 Hz, 1H), 7.31 - 7.42 (m, 2H), 7.24 (d, *J*=7.38 Hz, 1H), 7.10 (t, *J*=7.38 Hz, 2H), 6.88 (d, *J*=7.88 Hz, 1H), 6.90 (d, *J*=7.88 Hz, 1H), 4.42 - 4.45 (m, 1H), 4.37 - 4.42 (m, 2H), 4.34 (d, *J*=3.88 Hz, 1H), 4.14 (d, *J*=3.63 Hz, 1H), 4.02 - 4.11 (m, 2H), 3.94 (d, *J*=3.13 Hz, 1H), 3.25 (s, 3H), 3.24 (s, 3H), 1.39 (t, *J*=7.13 Hz, 3H), 1.07 (t, *J*=7.13 Hz, 3H);  $^{13}\text{C NMR}$  (101 MHz, CHLOROFORM-*d*)  $\delta$  ppm 173.2, 173.1 [C=O amide]; 164.6, 163.1 [C=O ester]; 144.6, 144.5 [C]; 129.7, 129.5 [CH]; 124.5, 123.8 [CH]; 123.6, 123.4 [C]; 123.1, 122.9 [CH]; 115.3, 113.3 [CN]; 108.8, 108.5 [CH]; 63.6, 63.0 [CH<sub>2</sub>]; 44.7, 44.6 [CH]; 39.0, 37.7 [CH]; 26.5, 26.4 [CH<sub>3</sub>]; 13.9, 13.6 [CH<sub>3</sub>]; **HRMS** (ESI) calcd for: C<sub>14</sub>H<sub>15</sub>O<sub>3</sub>N<sub>2</sub>, [M + H]<sup>+</sup> 259.1077, found: 259.1076.

**Ethyl 2-cyano-2-(1-ethyl-2-oxindolin-3-yl) acetate (3Aq):**

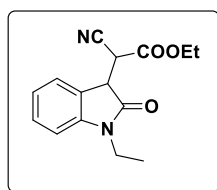

The titled compound was prepared by following the procedure A, obtained as a Solid, 74 mg, 92% yield, mp = 90–92°C; column chromatography on silica gel (petroleum ether/EtOAc 75:25); (Diastereomeric mixture, ratio 1:1)  $^1\text{H NMR}$  (400 MHz, CHLOROFORM-d)  $\delta$  ppm 7.52 (d,  $J=7.38$  Hz, 1H), 7.35 (q,  $J=7.34$  Hz, 2H), 7.23 (d,  $J=7.38$  Hz, 1H), 7.08 (t,  $J=7.50$  Hz, 2H), 6.84 - 6.96 (m, 2H), 4.37 - 4.44 (m, 3H), 4.35 (d,  $J=3.75$  Hz, 1H), 4.04 - 4.15 (m, 3H), 3.90 - 3.96 (m, 1H), 3.69 - 3.89 (m, 2H), 1.39 (t,  $J=7.13$  Hz, 3H), 1.28 (t,  $J=7.25$  Hz, 6H), 1.07 (t,  $J=7.82$  Hz, 3H);  $^{13}\text{C NMR}$  (101 MHz, CHLOROFORM-d)  $\delta$  ppm 172.4, 172.4 [C=O amide]; 164.3, 162.8 [C=O ester]; 143.4, 143.21 [C]; 129.2, 129.0 [CH]; 124.3, 123.6 [CH]; 123.5, 123.3 [C]; 122.5, 122.3 [CH]; 114.9, 112.8 [CN]; 108.5, 108.2 [CH]; 63.2, 62.6 [CH<sub>2</sub>]; 44.30 [CH]; 38.8, 37.4 [CH]; 34.7, 34.6 [CH<sub>2</sub>]; 13.5, 13.2 [CH<sub>3</sub>]; 12.0, 11.9 [CH<sub>3</sub>]; **HRMS** (ESI) calcd for: C<sub>15</sub>H<sub>17</sub>O<sub>3</sub>N<sub>2</sub>, [ M + H]<sup>+</sup> 273.1234, found: 273.1225.

**Ethyl 2-cyano-2-(1-isopropyl-2-oxindolin-3-yl) acetate (3Ar):**

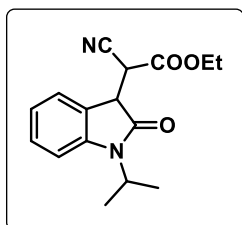

The titled compound was prepared by following the procedure A, obtained as a Solid, 72 mg, 85% yield, mp = 88–90°C; column chromatography on silica gel (petroleum ether/EtOAc 77:23); (Diastereomeric mixture, ratio 1:1)  $^1\text{H NMR}$  (400 MHz, CHLOROFORM-d)  $\delta$  ppm 7.53 (d,  $J=7.50$  Hz, 1H), 7.33 (q,  $J=7.67$  Hz, 2H), 7.22 (d,  $J=7.75$  Hz, 1H), 7.06 - 7.09 (m, 2H), 7.01 - 7.05 (m, 2H), 4.61 (quind,  $J=7.04, 7.04, 7.04, 7.04, 2.63$  Hz, 2H), 4.37 - 4.44 (m, 3H), 4.33 (d,  $J=3.75$  Hz, 1H), 4.04 - 4.16 (m, 3H), 3.89 (d,  $J=3.00$  Hz, 1H), 1.49 - 1.54 (m, 12H), 1.39 (t,  $J=7.19$  Hz, 3H), 1.08 (t,  $J=7.13$  Hz, 3H);  $^{13}\text{C NMR}$  (101 MHz, CHLOROFORM-d)  $\delta$  ppm 173.3, 173.2 [C=O amide]; 165.1, 163.5 [C=O ester]; 143.9, 143.7 [C]; 129.8, 129.5 [CH]; 125.1, 124.3 [CH]; 124.4 124.2 [C]; 122.9, 122.7 [CH]; 115.7, 113.5 [CN]; 110.7, 110.4 [CH]; 63.9, 63.4 [CH<sub>2</sub>]; 45.1 [CH]; 44.9, 44.8 [CH]; 39.8, 38.3 [CH]; 19.6, 19.5 [CH<sub>3</sub>]; 19.4, 19.3 [CH<sub>3</sub>]; 14.3, 13.9 [CH<sub>3</sub>]; **HRMS** (ESI) calcd for: C<sub>16</sub>H<sub>19</sub>O<sub>3</sub>N<sub>2</sub>, [ M + H]<sup>+</sup> 287.1390, found: 287.1390.

### Ethyl 2-(1-allyl-2-oxoindolin-3-yl)-2-cyanoacetate (3As):

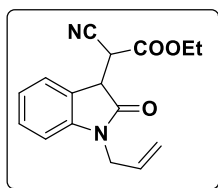

The titled compound was prepared by following the procedure A, obtained as a Solid, 73 mg, 86% yield, mp = 95–97°C; column chromatography on silica gel (petroleum ether/EtOAc 75:25); (Diastereomeric mixture, ratio 1:1)  $^1\text{H NMR}$  (400 MHz, CHLOROFORM-d)  $\delta$  ppm 7.46 (d,  $J=7.50$  Hz, 1H), 7.25 (q,  $J=7.46$  Hz, 2H), 7.16 (d,  $J=7.38$  Hz, 1H), 7.01 (t,  $J=7.25$  Hz, 2H), 6.80 (t,  $J=8.00$  Hz, 2H), 5.76 (ddt,  $J=15.29, 10.22, 5.19, 5.19$  Hz, 2H), 5.11 - 5.29 (m, 4H), 4.32 - 4.41 (m, 4H), 4.20 - 4.32 (m, 4H), 4.11 (d,  $J=3.63$  Hz, 1H), 3.97 - 4.08 (m, 2H), 3.90 (d,  $J=3.13$  Hz, 1H), 1.32 (t,  $J=7.13$  Hz, 3H), 1.02 (t,  $J=7.19$  Hz, 3H);  $^{13}\text{C NMR}$  (101 MHz, CHLOROFORM-d)  $\delta$  ppm 173.0, 172.8 [C=O amide]; 164.6, 163.1 [C=O ester]; 143.8, 143.7 [C]; 130.8, 130.4 [CH]; 129.6, 129.3 [CH]; 124.5, 123.8 [CH]; 123.6, 123.4 [C]; 123.1, 122.8 [CH]; 118.0, 117.8 [=CH<sub>2</sub>]; 115.3, 113.3 [CN]; 109.7, 109.4 [CH]; 63.7, 63.1 [CH<sub>2</sub>]; 44.8, 44.7 [CH]; 42.7, 42.5 [CH<sub>2</sub>]; 39.1, 37.7 [CH]; 13.9, 13.6 [CH<sub>3</sub>]; **HRMS** (ESI) calcd for: C<sub>16</sub>H<sub>17</sub>O<sub>3</sub>N<sub>2</sub>, [ M + H]<sup>+</sup> 285.1234, found: 285.1234

### Ethyl 2-cyano-2-(2-oxo-1-(prop-2-yn-1-yl)indolin-3-yl) acetate (3At):

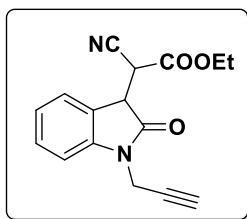

The titled compound was prepared by following the procedure A, obtained as a Solid, 67 mg, 80% yield, mp = 102–104°C; column chromatography on silica gel (petroleum ether/EtOAc 76:24); (Diastereomeric mixture, ratio 1:1.35);  $^1\text{H NMR}$  (400 MHz, CHLOROFORM-d)  $\delta$  ppm 7.47 (d,  $J=7.38$  Hz, 1H), 7.31 (q,  $J=7.25$  Hz, 2H), 7.14 - 7.23 (m, 1H), 7.03 (q,  $J=8.17$  Hz, 4H), 4.51 - 4.59 (m, 1H), 4.48 (d,  $J=2.38$  Hz, 1H), 4.42 (d,  $J=2.50$  Hz, 1H), 4.34 - 4.38 (m, 2H), 4.28 - 4.34 (m, 2H), 4.26 (d,  $J=3.88$  Hz, 1H), 4.10 (d,  $J=3.75$  Hz, 1H), 3.99 (dd,  $J=14.95, 7.19$  Hz, 2H), 3.89 (d,  $J=3.00$  Hz, 1H), 2.21 (s, 2H), 1.30 (t,  $J=7.13$  Hz, 3H), 0.96 (t,  $J=7.13$  Hz, 3H);  $^{13}\text{C NMR}$  (101 MHz, CHLOROFORM-d)  $\delta$  ppm 172.0, 171.8 [C=O amide]; 164.1, 162.6 [C=O ester]; 142.3, 142.2 [C]; 129.3, 129.1 [CH]; 124.2, 123.5 [CH]; 123.06 [C]; 123.1, 122.9 [CH]; 114.8, 112.81 [CN]; 109.4, 109.1 [CH]; 75.9, 75.8 [CH]; 72.4, 72.2 [C]; 63.3, 62.8 [CH<sub>2</sub>]; 44.2 [CH]; 38.5, 37.4

[CH]; 29.2, 29.1 [CH<sub>2</sub>]; 13.5, 13.1 [CH<sub>3</sub>]; **HRMS** (ESI) calcd for: C<sub>16</sub>H<sub>15</sub>O<sub>3</sub>N<sub>2</sub>, [ M + H]<sup>+</sup> 283.1077, found: 283.1078.

**Ethyl 2-cyano-2-(1-isobutyl-2-oxoindolin-3-yl) acetate (3Au):**

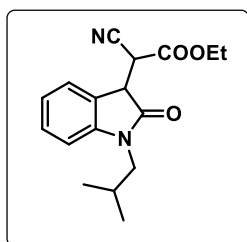

The titled compound was prepared by following the procedure A, obtained as a Solid, 79 mg, 88% yield, mp = 86–88°C; column chromatography on silica gel (petroleum ether/EtOAc 80:20); (Diastereomeric mixture, ratio 1:1); **<sup>1</sup>H NMR** (400 MHz, CHLOROFORM-d) δ ppm 7.51 (d, J=7.50 Hz, 1H), 7.29 - 7.38 (m, 2H), 7.23 (d, J=7.50 Hz, 1H), 7.04 - 7.12 (m, 2H), 6.88 (d, J=7.88 Hz, 1H), 6.91 (d, J=7.88 Hz, 1H), 4.42 - 4.46 (m, 1H), 4.38 - 4.42 (m, 2H), 4.36 (d, J=3.63 Hz, 1H), 4.15 (d, J=3.63 Hz, 1H), 4.06 - 4.14 (m, 2H), 3.97 (d, J=3.13 Hz, 1H), 3.58 - 3.66 (m, 1H), 3.53 (dd, J=7.50, 3.50 Hz, 2H), 3.44 - 3.50 (m, 1H), 2.05 - 2.24 (m, 2H), 1.40 (t, J=7.13 Hz, 3H), 1.10 (t, J=7.13 Hz, 3H), 0.95 - 1.02 (m, 12H); **<sup>13</sup>C NMR** (101 MHz, CHLOROFORM-d) δ ppm 173.4, 173.2 [C=O amide]; 164.7, 163.2 [C=O ester]; 144.6, 144.3 [C]; 129.5, 129.3 [CH]; 124.6, 123.8 [CH]; 123.7, 123.5 [C]; 122.9, 122.6 [CH]; 115.3, 113.4 [CN]; 109.3, 109.0 [CH]; 63.6, 63.1 [CH<sub>2</sub>]; 48.0, 47.9 [CH<sub>2</sub>]; 44.8, 44.7 [CH]; 39.1, 37.7 [CH]; 27.1, 26.9 [CH]; 20.2 [CH<sub>3</sub>]; 20.0 [CH<sub>3</sub>]; 14.0, 13.6 [CH<sub>3</sub>]; **HRMS** (ESI) calcd for: C<sub>17</sub>H<sub>21</sub>O<sub>3</sub>N<sub>2</sub>, [ M + H]<sup>+</sup> 301.1551, found: 301.1541.

**Ethyl 2-cyano-2-(5-fluoro-1-methyl-2-oxoindolin-3-yl) acetate (3Av):**

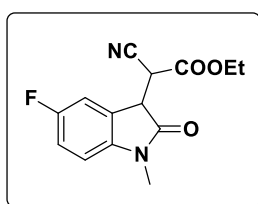

The titled compound was prepared by following the procedure A, obtained as Solid, 73 mg, 90% yield, mp = 112–114°C; column chromatography on silica gel (petroleum ether/EtOAc 75:25); (Diastereomeric mixture, ratio 1:1.60) **<sup>1</sup>H NMR** (400 MHz, CHLOROFORM-d) δ ppm 7.22 (dd, J=7.25, 2.13 Hz, 1H), 6.91 - 7.04 (m, 3H), 6.68 - 6.80 (m, 2H), 4.32 - 4.38 (m, 3H), 4.30 (d, J=3.63 Hz, 1H), 3.98 - 4.07 (m, 3H), 3.87 (d, J=3.00 Hz, 1H), 3.16 (s, 3H), 3.15 (s, 3H), 1.31 (t, J=7.13 Hz, 3H), 1.04 (t, J=7.13 Hz, 3H); **<sup>13</sup>C NMR** (101 MHz, CHLOROFORM-d) δ ppm 172.9, 172.8 [C=O amide]; 164.5, 163.1 [C=O ester]; 160.4, 157.9 (d, J = 241.7 Hz), [C-F]; 140.8, 140.6 [C]; 125.2, 125.0 [C]; 116.2, 115.7 (d, J = 12.7 Hz), [CH]; 115.1, 113.2 [CN]; 113.2, 112.1 (d, J = 21.9 Hz), [CH]; 109.5, 109.1 (d, J = 15.5 Hz) [CH]; 63.9, 63.3 [CH<sub>2</sub>]; 44.9, 44.8 [CH]; 38.9, 37.6

[CH]; 26.7 [N-CH<sub>3</sub>]; 14.0, 13.7 [CH<sub>3</sub>]; <sup>19</sup>F NMR (377 MHz, CHLOROFORM-d) δ ppm -119.37 (s, 1F), -119.53 (s, 1F); HRMS (ESI) calcd for: C<sub>14</sub>H<sub>14</sub>O<sub>3</sub>N<sub>2</sub>F, [M + H]<sup>+</sup> 277.0983, found: 277.0969.

**Ethyl 2-cyano-2-(1,5-dimethyl-2-oxoindolin-3-yl) acetate (3Aw):**

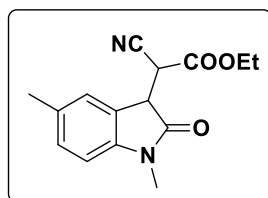

The titled compound was prepared by following the procedure A, obtained as a Solid, 75 mg, 92% yield, mp = 102–106°C; column chromatography on silica gel (petroleum ether/EtOAc 75:25); (Diastereomeric mixture, ratio 1:1) <sup>1</sup>H NMR (400 MHz, CHLOROFORM-d) δ ppm 7.31 - 7.38 (m, 1H), 7.16 (t, J=6.75 Hz, 2H), 7.05 (s, 1H), 6.76 (d, J=7.88 Hz, 1H), 6.79 (d, J=8.00 Hz, 1H), 4.42 - 4.46 (m, 1H), 4.39 - 4.42 (m, 2H), 4.32 (d, J=3.75 Hz, 1H), 4.10 - 4.13 (m, 1H), 4.05 - 4.10 (m, 2H), 3.90 (d, J=3.00 Hz, 1H), 3.23 (s, 3H), 3.22 (s, 3H), 2.35 (s, 3H), 2.33 (s, 3H), 1.40 (t, J=7.13 Hz, 3H), 1.08 (t, J=7.19 Hz, 3H); <sup>13</sup>C NMR (101 MHz, CHLOROFORM-d) δ ppm 172.8, 172.7 [C=O amide]; 164.4, 162.8 [C=O ester]; 142.0, 141.8 [C]; 132.5, 132.3 [C]; 129.6, 129.4 [CH]; 125.0, 124.3 [CH]; 123.3, 123.2 [C]; 115.1, 113.12 [CN]; 108.2, 107.9 [CH]; 63.3, 62.7 [CH<sub>2</sub>]; 44.5, 44.4 [CH]; 38.7, 37.5 [CH]; 26.3, 26.2 [N-CH<sub>3</sub>]; 20.8, 20.7 [CH<sub>3</sub>]; 13.7, 13.3 [CH<sub>3</sub>]; HRMS (ESI) calcd for: C<sub>15</sub>H<sub>17</sub>O<sub>3</sub>N<sub>2</sub>, [M + H]<sup>+</sup> 273.1234, found: 273.1222.

**Ethyl 2-cyano-2-(5-methoxy-1-methyl-2-oxoindolin-3-yl) acetate (3Ax):**

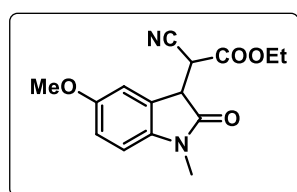

The titled compound was prepared by following the procedure A, obtained as a Solid, 74 mg, 86% yield, mp = 98–100°C; column chromatography on silica gel (petroleum ether/EtOAc 70:30); (Diastereomeric mixture, ratio 1:1) <sup>1</sup>H NMR (400 MHz, CHLOROFORM-d) δ ppm 7.14 (s, 1H), 6.85 - 6.92 (m, 3H), 6.79 (t, J=9.35 Hz, 2H), 4.40 - 4.44 (m, 2H), 4.37 - 4.40 (m, 1H), 4.35 (d, J=3.79 Hz, 1H), 4.03 - 4.15 (m, 3H), 3.92 (d, J=3.06 Hz, 1H), 3.78 (d, J=6.36 Hz, 6H), 3.21 (d, J=4.65 Hz, 6H), 1.39 (t, J=7.15 Hz, 3H), 1.11 (t, J=7.15 Hz, 3H); <sup>13</sup>C NMR (101 MHz, CHLOROFORM-d) δ ppm 172.7, 172.6 [C=O amide]; 164.6, 163.1 [C=O ester]; 156.1, 156.0 [C]; 138., 137.9 [C]; 124.8, 124.6 [C]; 113.7, 113.6 [CH]; 115.17, 113.29 [CN]; 112.2, 111.1 [CH]; 109.0, 108.8 [CH]; 63.6, 63.0 [CH<sub>2</sub>]; 55.7, 55.6 [CH<sub>3</sub>]; 45.0, 44.9 [CH<sub>3</sub>]; 38.9, 37.7 [CH]; 26.5,

26.4 [CH]; 13.9, 13.5 [CH<sub>3</sub>]; **HRMS** (ESI) calcd for: C<sub>15</sub>H<sub>17</sub>O<sub>4</sub>N<sub>2</sub>, [ M + H]<sup>+</sup> 289.1183, found: 289.1176.

**Ethyl 2-cyano-2-(1-methyl-2-oxo-5-(trifluoromethoxy) indolin-3-yl) acetate (4Ay):**

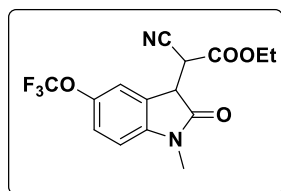

The titled compound was prepared by following the procedure A, obtained as a Solid, 95 mg, 92% yield, mp = 124–128°C; column chromatography on silica gel (petroleum ether/EtOAc 70:30); (Diastereomeric mixture, ratio 1:1); **<sup>1</sup>H NMR** (400 MHz, CHLOROFORM-d) δ ppm 7.35 (s, 1H), 7.14 - 7.22 (m, 2H), 7.09 (s, 1H), 6.83 (d, J=8.63 Hz, 1H), 6.80 (d, J=8.50 Hz, 1H), 4.36 (d, J=3.13 Hz, 1H), 4.31 - 4.36 (m, 2H), 4.30 (d, J=3.75 Hz, 1H), 4.08 (d, J=3.63 Hz, 1H), 3.98 - 4.06 (m, 2H), 3.89 (d, J=3.25 Hz, 1H), 3.19 (s, 3H), 3.17 (s, 3H), 1.32 (t, J=7.13 Hz, 3H), 1.05 (t, J=7.19 Hz, 3H); **<sup>13</sup>C NMR** (101 MHz, CHLOROFORM-d) δ ppm 172.9, 172.8 [C=O amide]; 164.4, 162.9 [C=O ester]; 144.8 144.6 [C-O], 143.5, 143.2 [C];, 125.1, 124.8 [C]; 122.8, 122.6 [CH]; 121.7, 119.1 [-OCF<sub>3</sub>] 118.8, 118.0 [CH]; 114.9, 113.0 [CN]; 109.3, 109.0 [CH]; 63.9, 63.3 [CH<sub>2</sub>]; 44.8, 44.6 [CH]; 38.8, 37.5[CH]; 26.7, 26.6 [N-CH<sub>3</sub>]; 13.82, 13.5 [CH<sub>3</sub>]; **<sup>19</sup>F NMR** (376 MHz, CHLOROFORM-d) δ ppm -58.44 (s, 1F), -58.49 (s, 1F) ; **HRMS** (ESI) calcd for: C<sub>15</sub>H<sub>14</sub>O<sub>4</sub>N<sub>2</sub>F<sub>3</sub>, [ M + H]<sup>+</sup> 343.0900, found: 343.0891.

**2-(2-oxoindolin-3-yl) malononitrile (3B):**

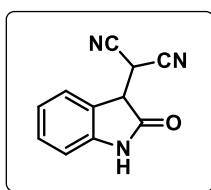

The titled compound was prepared by following the procedure A, obtained as a Solid, 55 mg, 92% yield, mp = 160–164°C; column chromatography on silica gel (petroleum ether/EtOAc 60:40); **<sup>1</sup>H NMR** (400 MHz, CHLOROFORM-d) δ ppm 10.92 (s, 1H), 7.46 (d, J=7.38 Hz, 1H), 7.33 (t, J=7.75 Hz, 1H), 7.01 - 7.16 (m, 1H), 6.94 (d, J=7.75 Hz, 1H), 5.64 (d, J=4.50 Hz, 1H), 4.44 (d, J=4.38 Hz, 1H); **<sup>13</sup>C NMR** (101 MHz, CHLOROFORM-d) δ ppm 173.7, 143.1, 129.8, 124.5, 123.7, 122.2, 112.7, 112.4, 110.2, 44.0, 23.8; **HRMS** (ESI) calcd for: C<sub>11</sub>H<sub>8</sub>ON<sub>3</sub>, [ M + H]<sup>+</sup> 198.0662, found: 198.0663.

**2-(7-fluoro-2-oxoindolin-3-yl) malononitrile (3Ba):**

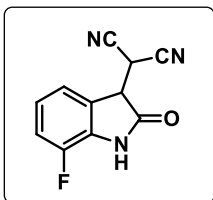

The titled compound was prepared by following the procedure A, obtained as a Solid, 58 mg, 90% yield, mp = 152–154°C; column chromatography on silica gel (petroleum ether/EtOAc 60:40); <sup>1</sup>H NMR (400 MHz, DMSO-*d*<sup>6</sup>) δ ppm 11.45 (s, 2H), 7.23 - 7.33 (m, 2H), 7.07 - 7.14 (m, 1H), 5.68 (d, *J*=4.50 Hz, 1H), 4.56 (d, *J*=4.50 Hz, 1H); <sup>13</sup>C NMR (101 MHz, DMSO-*d*<sup>6</sup>) δ ppm 173.5, 145.2 (d, *J* = 242.9 Hz); 130.2, 126.6, 123.2 (d, *J* = 10.9 Hz); 120.6 (d, *J* = 3.3 Hz); 117.0 (d, *J* = 17.0 Hz); 112.5, 112.2, 44.3, 23.8. <sup>19</sup>F NMR (376 MHz, DMSO-*d*<sup>6</sup>) δ ppm -127.17 (s, 1F) HRMS (ESI) calcd for: C<sub>11</sub>H<sub>6</sub>ON<sub>3</sub>FNa, [ M + Na]<sup>+</sup> 238.0390, found: 238.0384.

**2-(1-butyl-2-oxoindolin-3-yl) malononitrile (3Bb):**

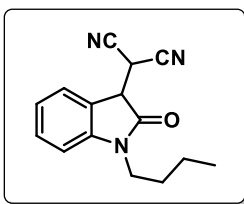

The titled compound was prepared by following the procedure A, obtained as a Solid, 65 mg, 86% yield, mp = 136–140°C; column chromatography on silica gel (petroleum ether/EtOAc 70:30); <sup>1</sup>H NMR (400 MHz, CHLOROFORM-*d*) δ ppm 7.58 (d, *J*=7.38 Hz, 1H), 7.37 (t, *J*=7.75 Hz, 1H), 7.12 (t, *J*=7.94 Hz, 1H), 6.89 (d, *J*=7.88 Hz, 1H), 4.50 (d, *J*=4.40 Hz, 1H), 3.85 (d, *J*=4.40 Hz, 1H), 3.81 (dt, *J*=14.13, 7.19 Hz, 1H), 3.61 (dt, *J*=14.13, 7.19 Hz, 1H), 1.57 - 1.65 (m, 2H), 1.33 (dq, *J*=14.95, 7.44 Hz, 2H), 0.88 (t, *J*=7.38 Hz, 3H); <sup>13</sup>C NMR (101 MHz, CHLOROFORM-*d*) δ ppm 170.8, 144.0, 130.7, 124.8, 123.6, 121.6, 111.6, 109.6, 109.5, 44.9, 40.5, 29.2, 24.6, 20.0, 13.6 HRMS (ESI) calcd for: C<sub>15</sub>H<sub>16</sub>ON<sub>3</sub>, [ M + H]<sup>+</sup> 254.1288, found: 254.1284.

### Diethyl 2-(2-oxoindolin-3-yl) malonate (3C):

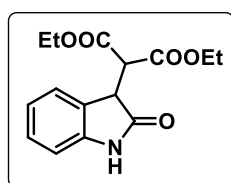

The titled compound was prepared by following the procedure, obtained as a Solid, 61 mg, 74% yield, mp = 88–90°C; column chromatography on silica gel (petroleum ether/EtOAc 75:25);  $^1\text{H NMR}$  (400 MHz, CHLOROFORM-*d*)  $\delta$  ppm 8.85 (br. s., 1H), 7.30 (d,  $J=7.50$  Hz, 1H), 7.15 (t,  $J=7.75$  Hz, 1H), 6.92 (t,  $J=7.63$  Hz, 1H), 6.82 (d,  $J=7.75$  Hz, 1H), 4.22 (m, 2H), 4.15 (d,  $J=7.13$  Hz, 1H), 4.00-3.95 (m, 3H), 1.22 (t,  $J=7.19$  Hz, 3H), 0.94 (t,  $J=7.13$  Hz, 3H);  $^{13}\text{C NMR}$  (101 MHz, CHLOROFORM-*d*)  $\delta$  ppm 177.7, 168.0, 166.9, 141.9, 128.6, 126.1, 125.1, 122.4, 109.8, 61.9, 61.7, 52.1, 45.1, 14.0, 13.; **HRMS** (ESI) calcd for:  $\text{C}_{15}\text{H}_{18}\text{O}_5\text{N}$ ,  $[\text{M} + \text{H}]^+$  292.1179, found: 292.1176.

### Ethyl 2-(2-oxoindolin-3-yl) acetate (3D):

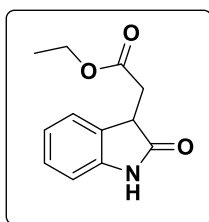

The titled compound was prepared by following the procedure A, obtained as a Solid, 37 mg, 56% yield, mp = 95–97°C; column chromatography on silica gel (petroleum ether/EtOAc 85:15);  $^1\text{H NMR}$  (400 MHz, CHLOROFORM-*d*)  $\delta$  ppm 9.17 (br. s., 1H), 7.08 - 7.18 (m, 2H), 6.88 - 6.96 (m, 1H), 6.84 (d,  $J=7.75$  Hz, 1H), 4.06 (dtt,  $J=10.76, 7.16, 7.16, 3.66, 3.66$  Hz, 2H), 3.74 (dd,  $J=7.82, 4.57$  Hz, 1H), 3.00 (dd,  $J=16.82, 4.57$  Hz, 1H), 2.76 (dd,  $J=16.88, 7.88$  Hz, 1H), 1.12 (t,  $J=7.13$  Hz, 3H);  $^{13}\text{C NMR}$  (101 MHz, CHLOROFORM-*d*)  $\delta$  ppm 179.9, 171.3, 142.0, 129.0, 128.5, 124.3, 122.7, 110.2, 61.3, 42.7, 35.0, 14.3; **HRMS** (ESI) calcd for:  $\text{C}_{12}\text{H}_{14}\text{O}_3\text{NNa}$ ,  $[\text{M} + \text{Na}]^+$  242.0993, found: 242.0988.

## 8. NMR Spectra of Compounds

### $^1\text{H}$ NMR spectrum of compound 3Aa (400 MHz, $\text{CDCl}_3$ )

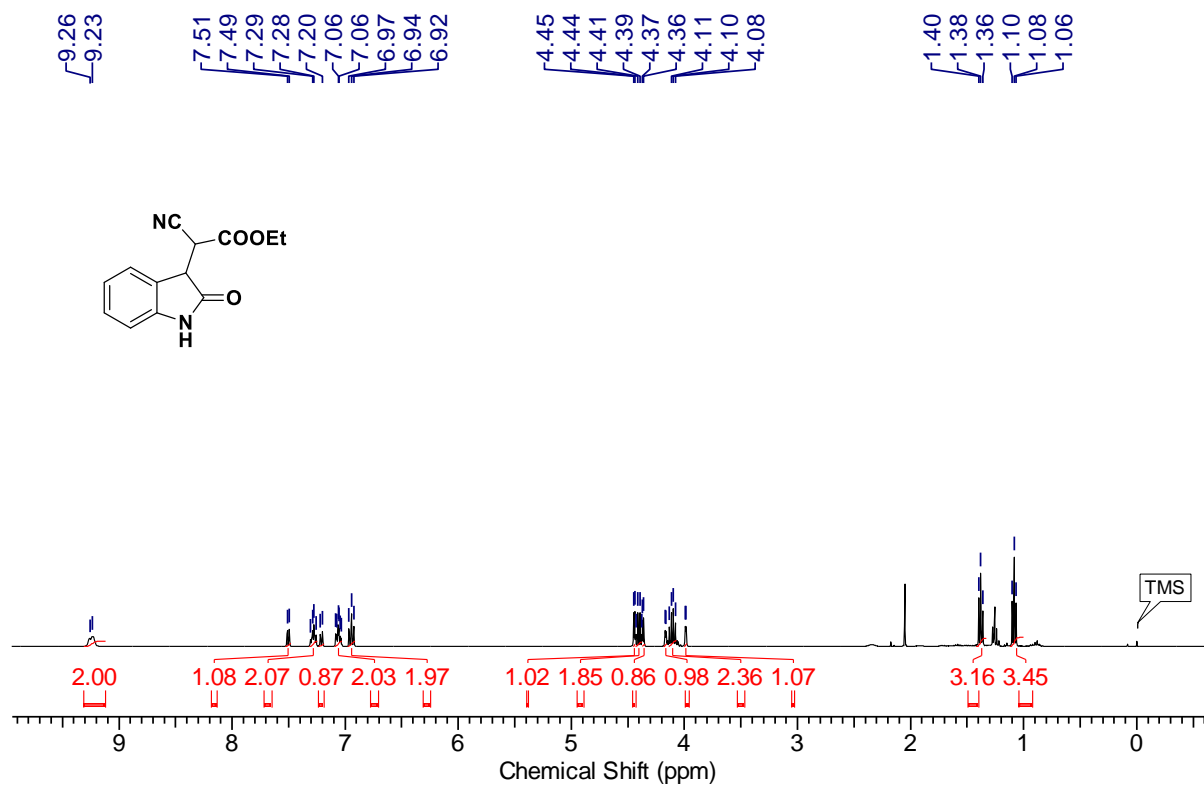

**<sup>13</sup>C NMR spectrum of compound 3Aa (101 MHz, CDCl<sub>3</sub>)**

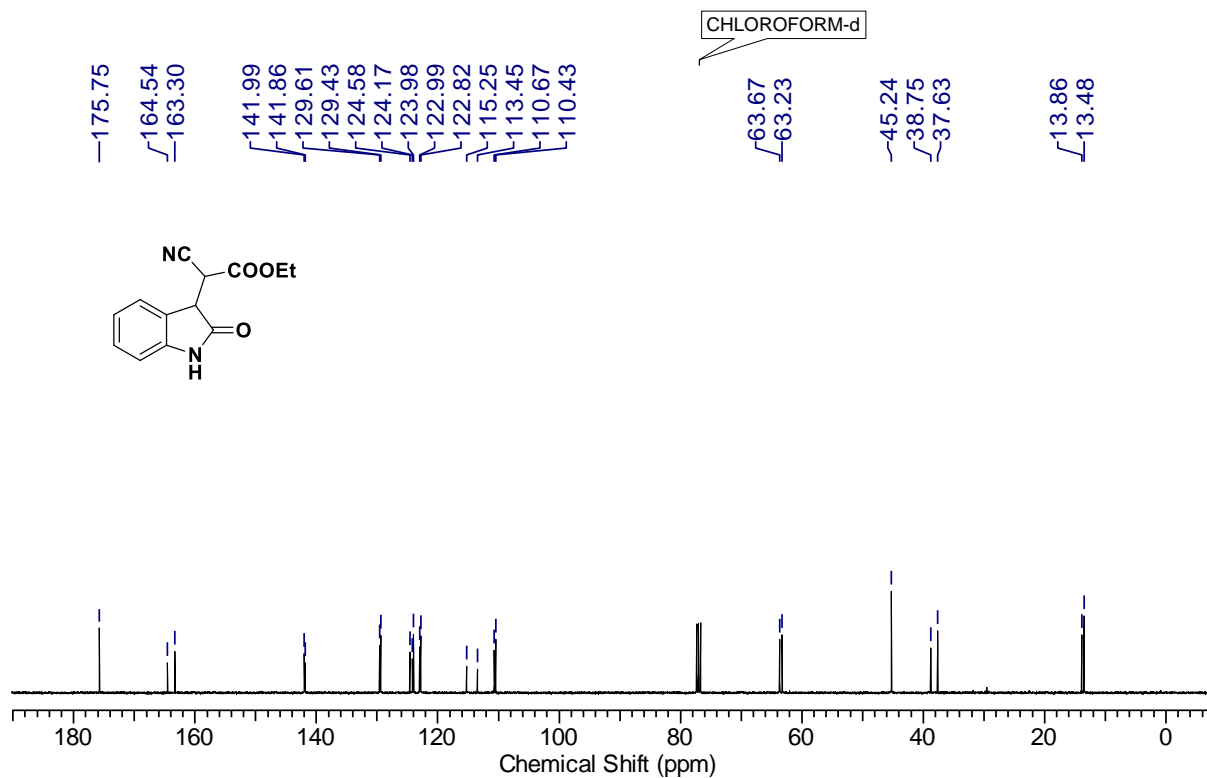

**<sup>135</sup> DEPT NMR spectrum of compound 3Aa**

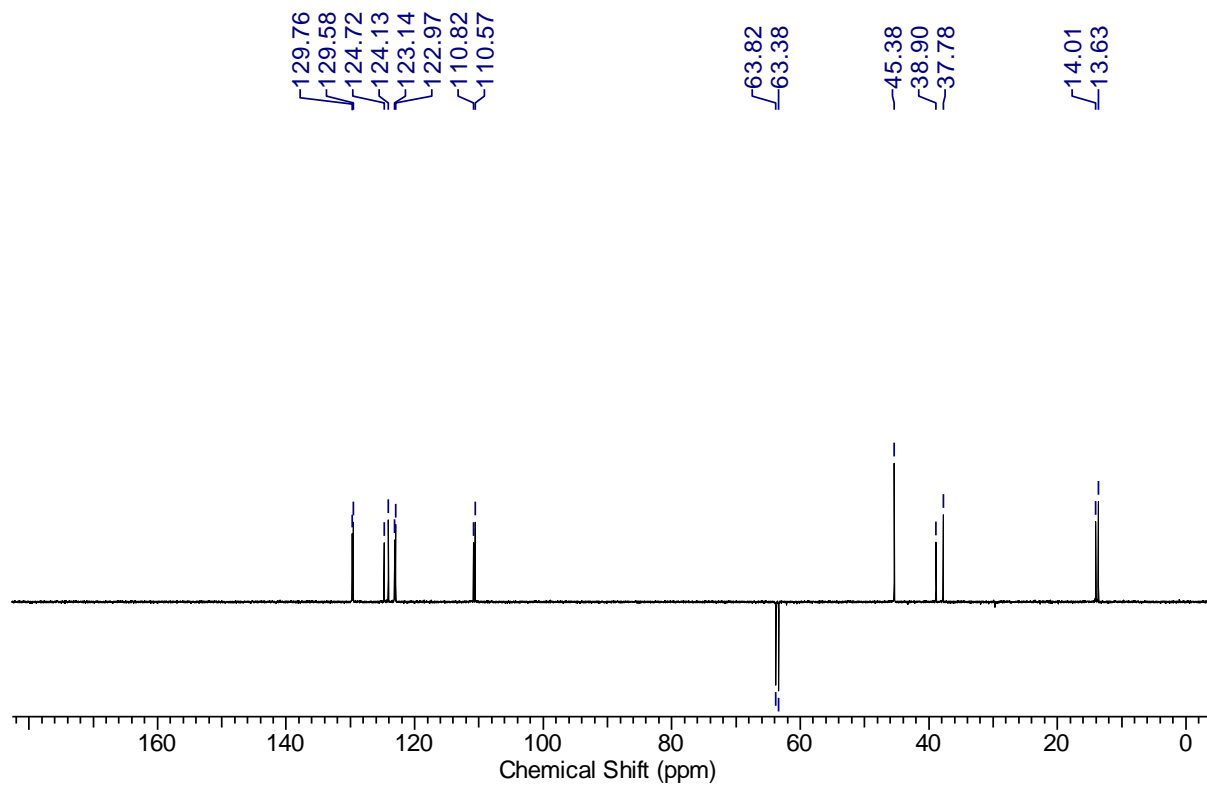

**<sup>1</sup>H NMR spectrum of compound 3Ab (400 MHz, CDCl<sub>3</sub>)**

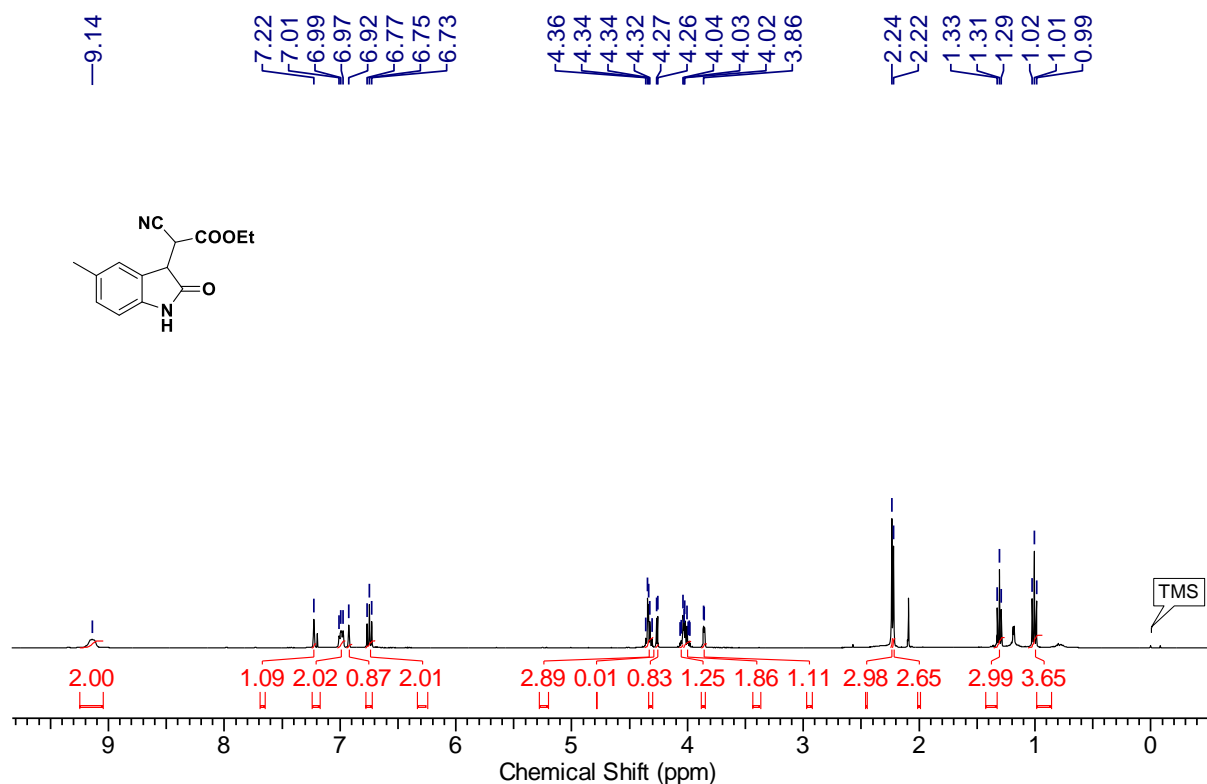

**<sup>13</sup>C NMR spectrum of compound 3Ab (101 MHz, CDCl<sub>3</sub>)**

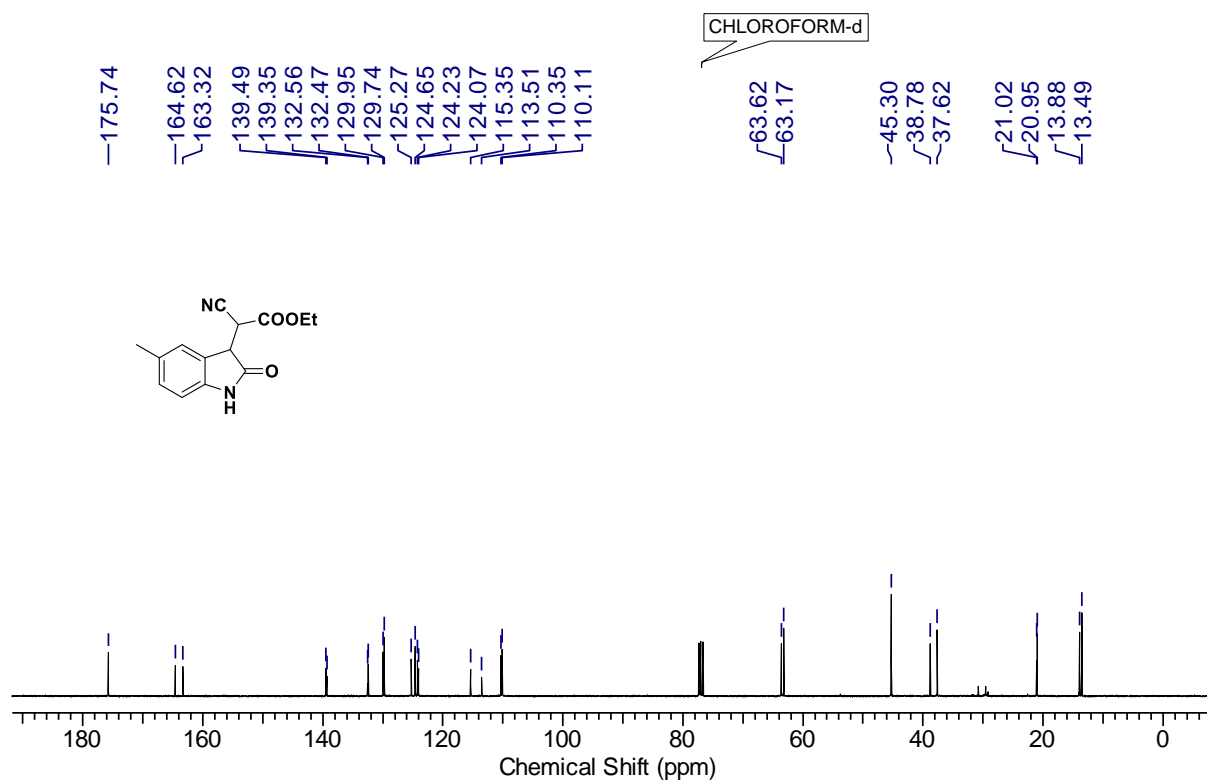

### 135 DEPT NMR spectrum of compound 3Ab

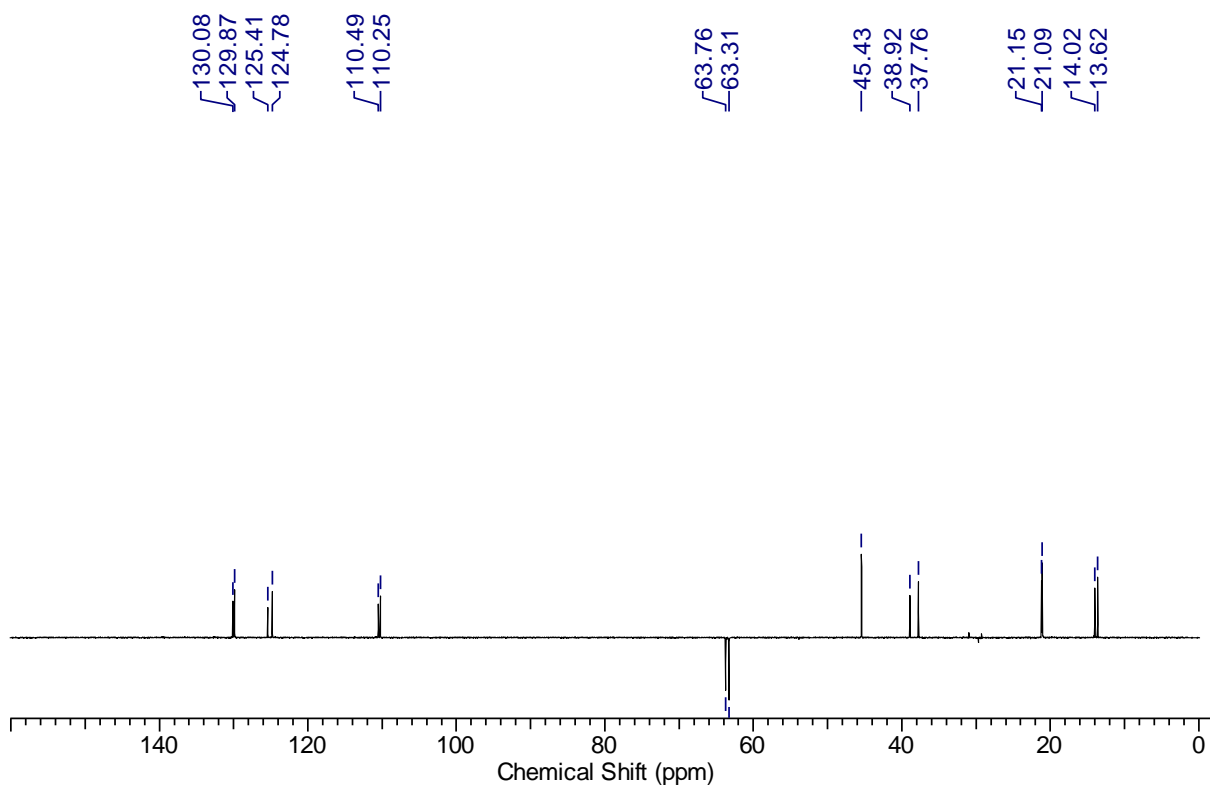

**<sup>1</sup>H NMR spectrum of compound 3Ac (400 MHz, CDCl<sub>3</sub>)**

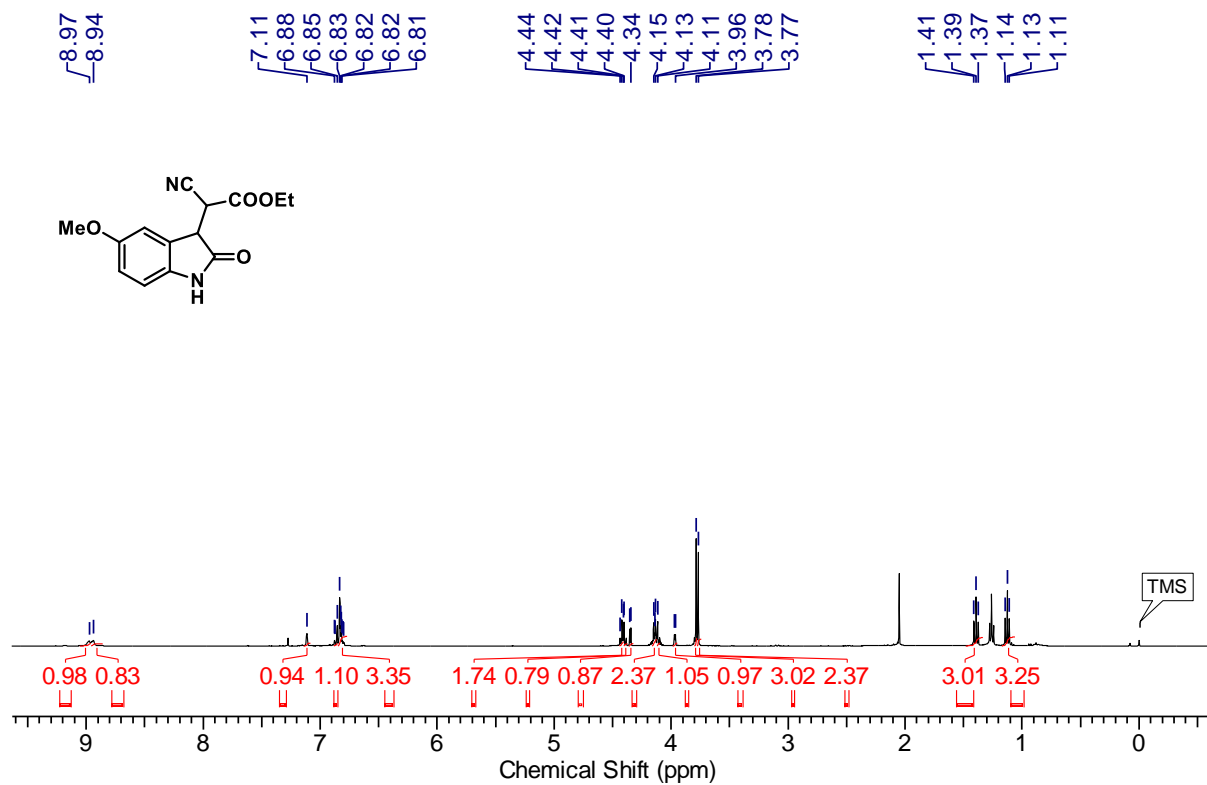

**<sup>13</sup>C NMR spectrum of compound 3Ac (101 MHz, CDCl<sub>3</sub>)**

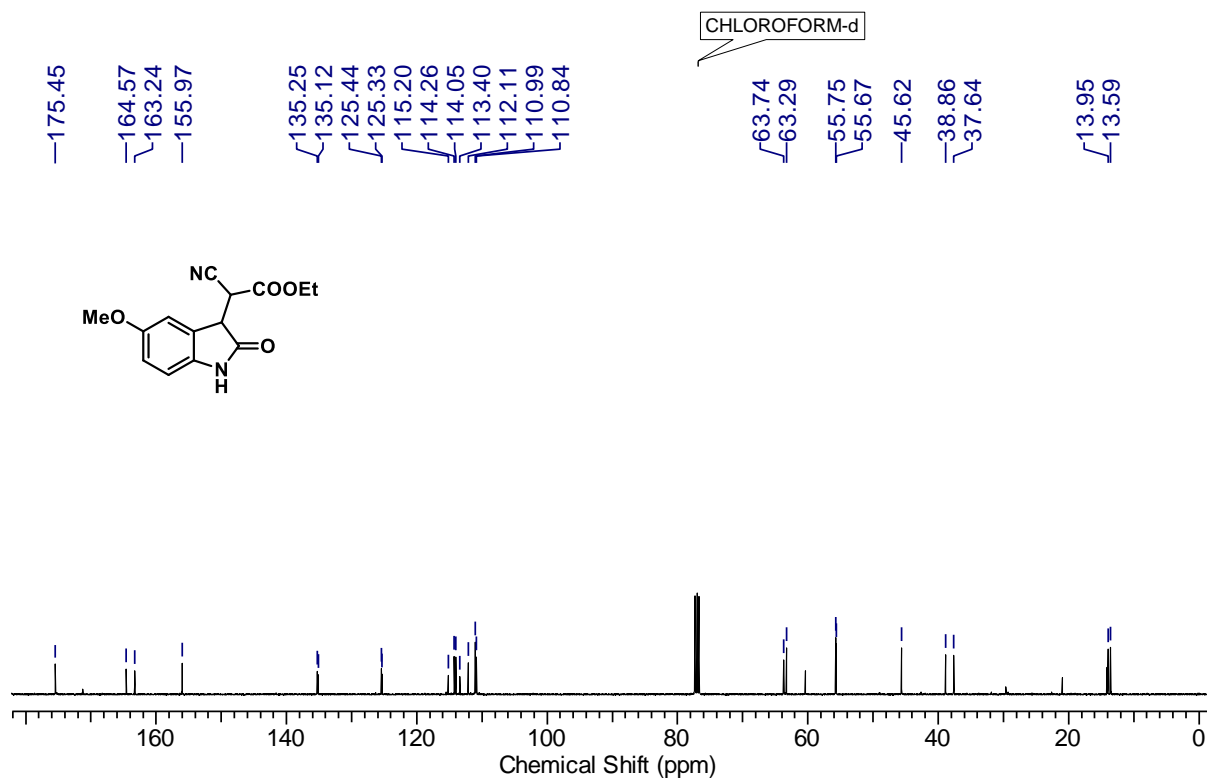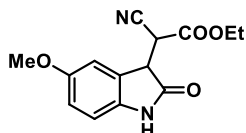

**<sup>135</sup> DEPT NMR spectrum of compound 3Ac**

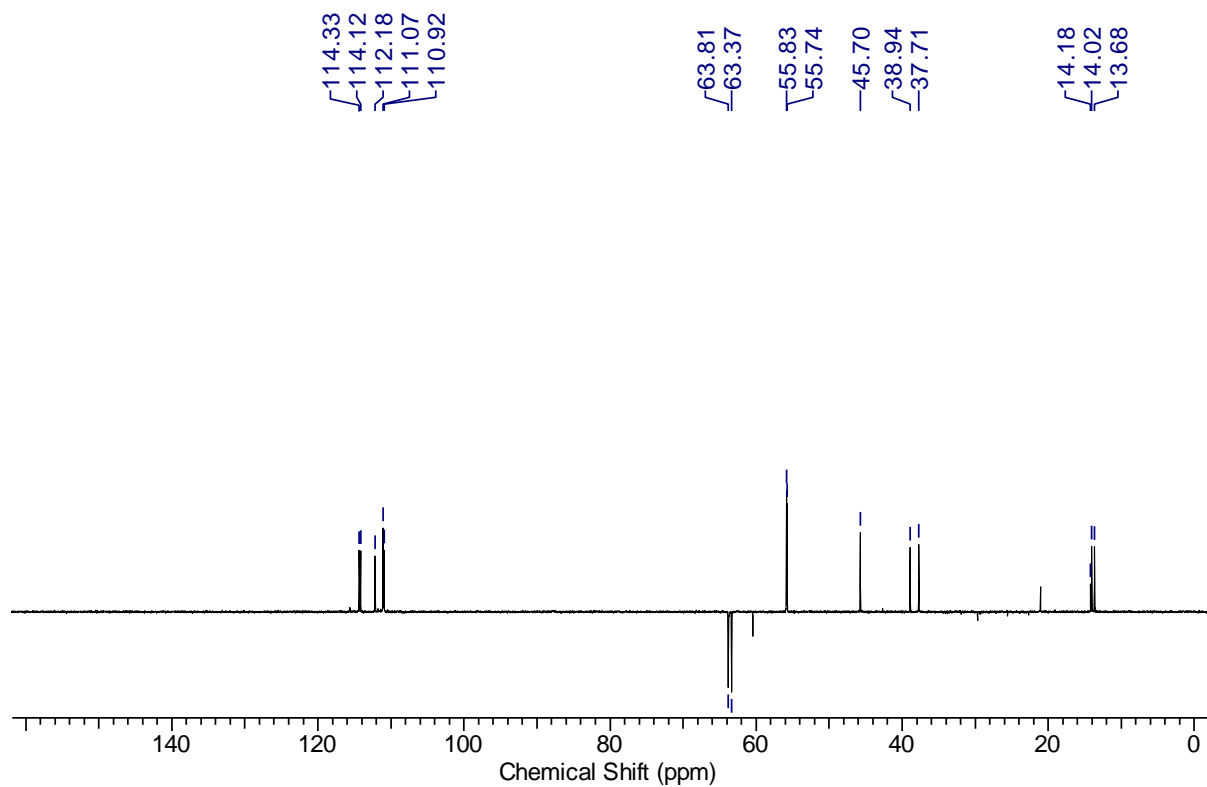

**<sup>1</sup>H NMR spectrum of compound 3Ad (400 MHz, CDCl<sub>3</sub>)**

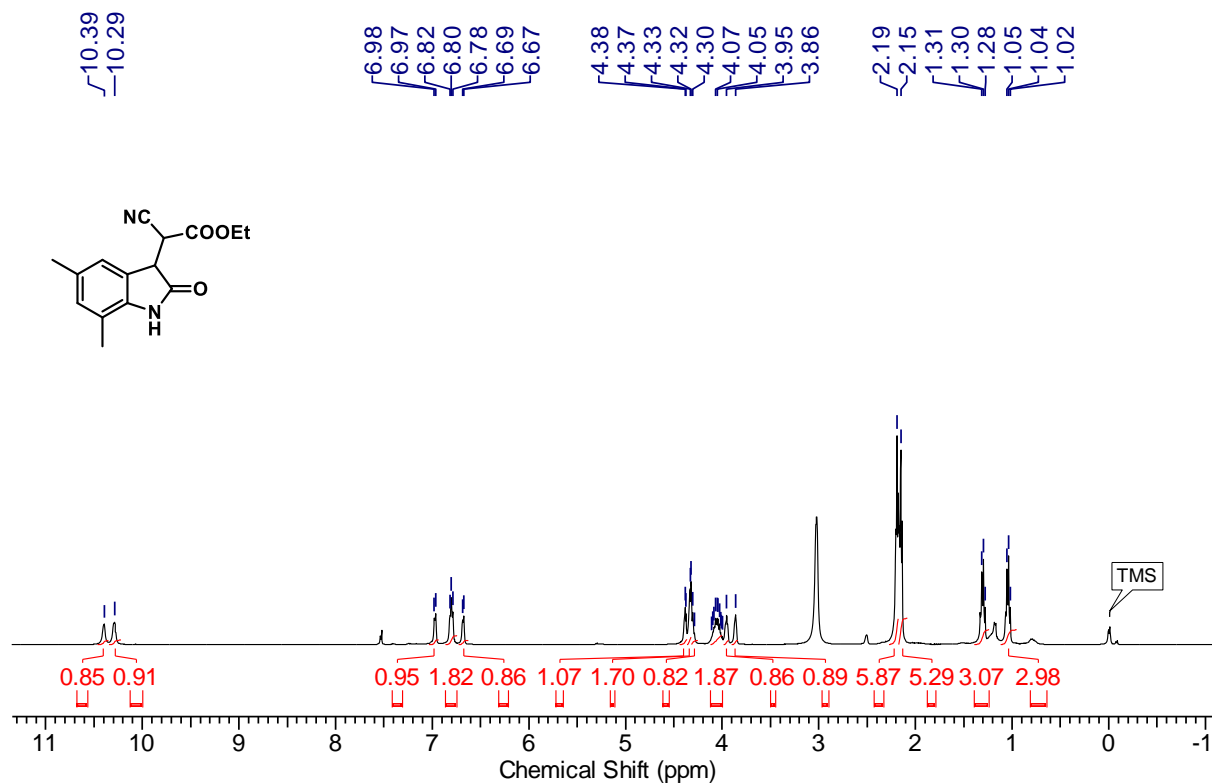

**<sup>13</sup>C NMR spectrum of compound 3Ad (101 MHz, CDCl<sub>3</sub>)**

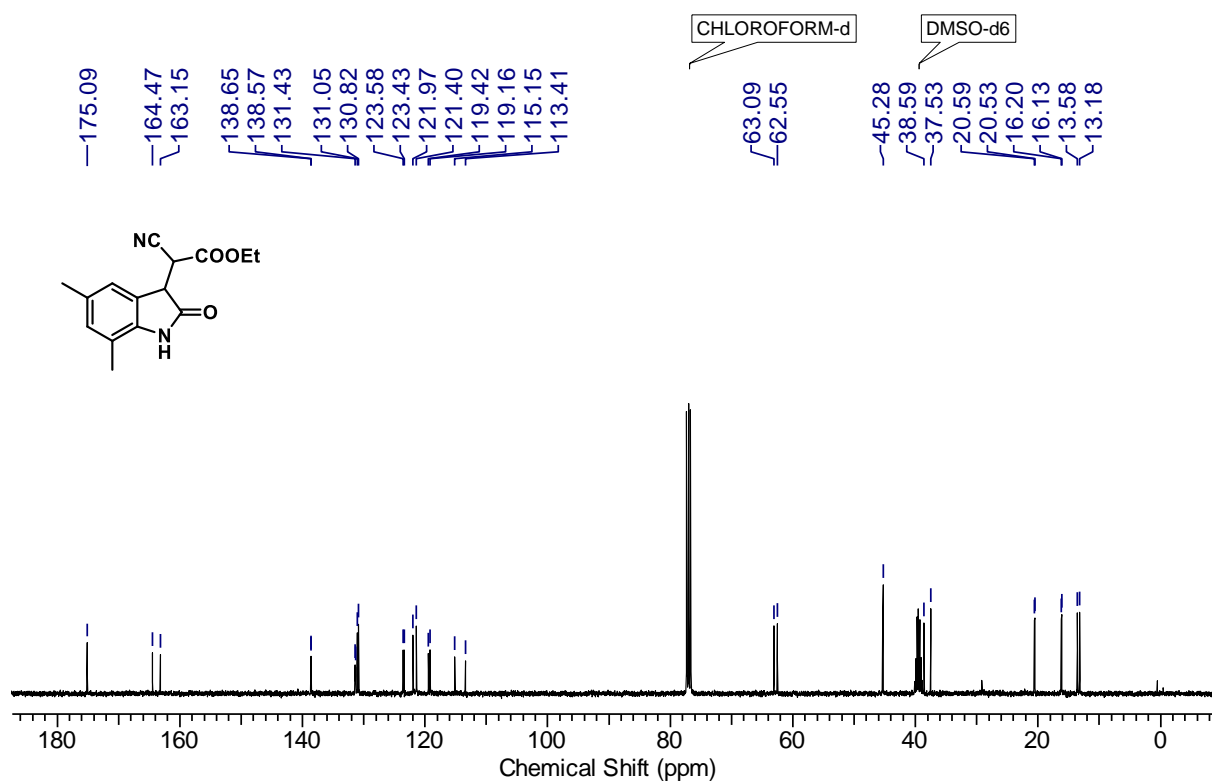

135 DEPT NMR spectrum of compound 3Ad

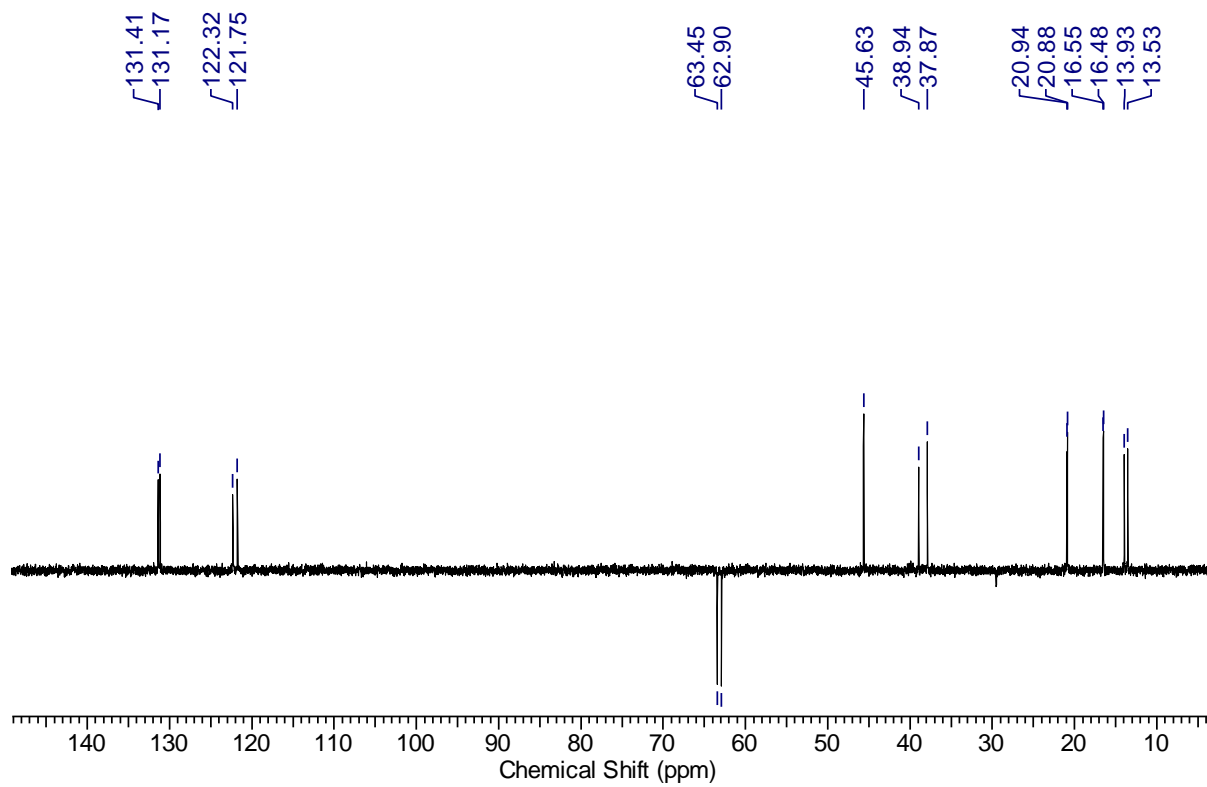

**<sup>1</sup>H NMR spectrum of compound 3Ae (400 MHz, CDCl<sub>3</sub>)**

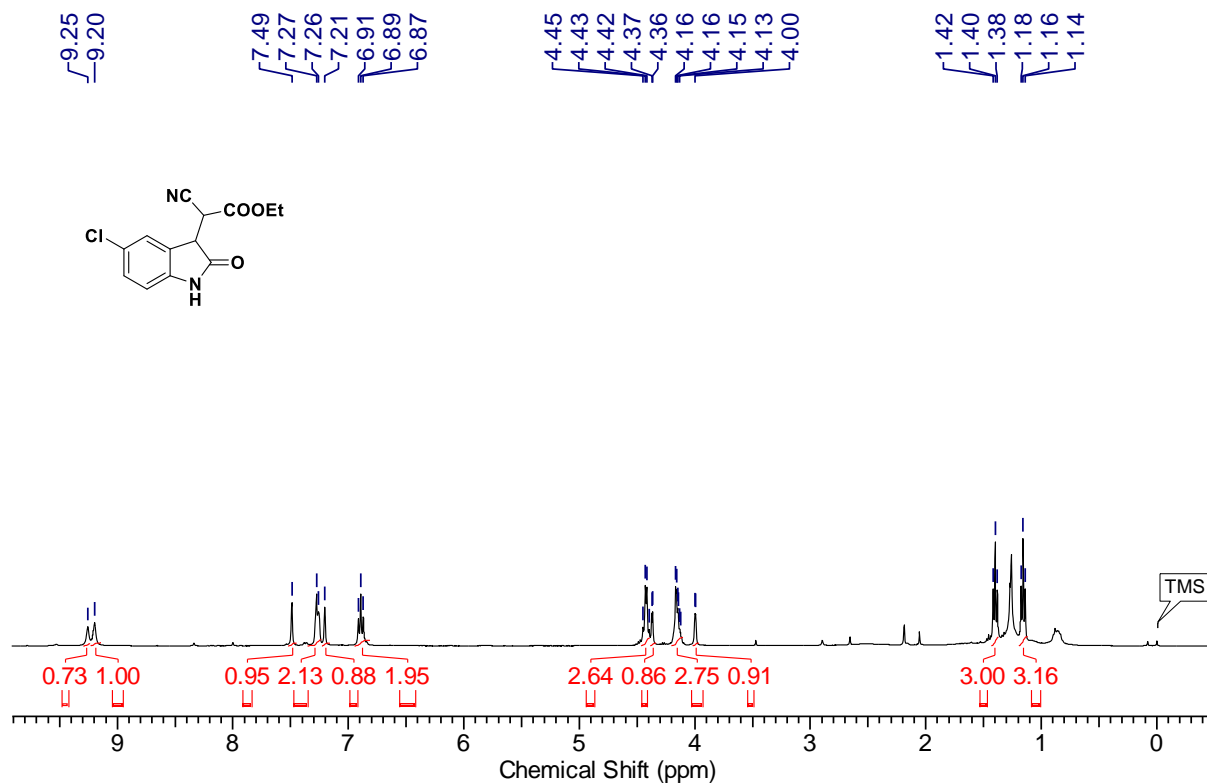

**<sup>13</sup>C NMR spectrum of compound 3Ae (101 MHz, CDCl<sub>3</sub>)**

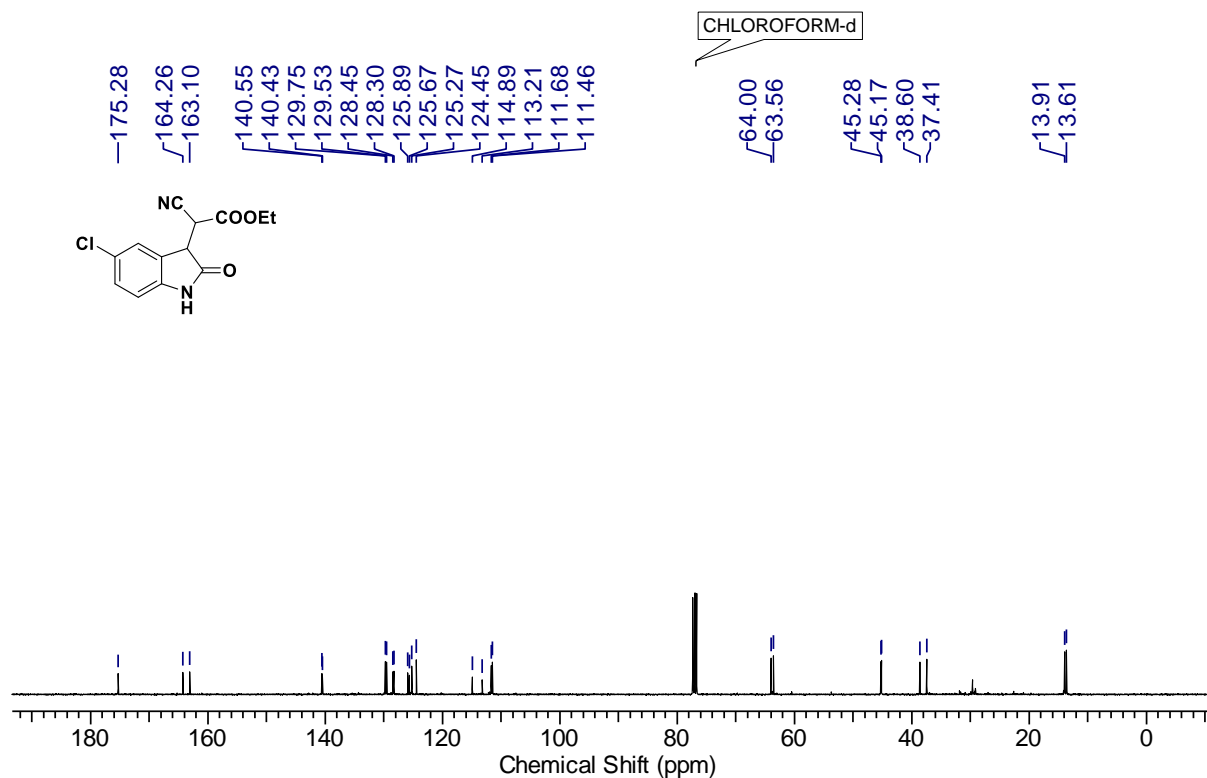

135 DEPT NMR spectrum of compound 3Ae

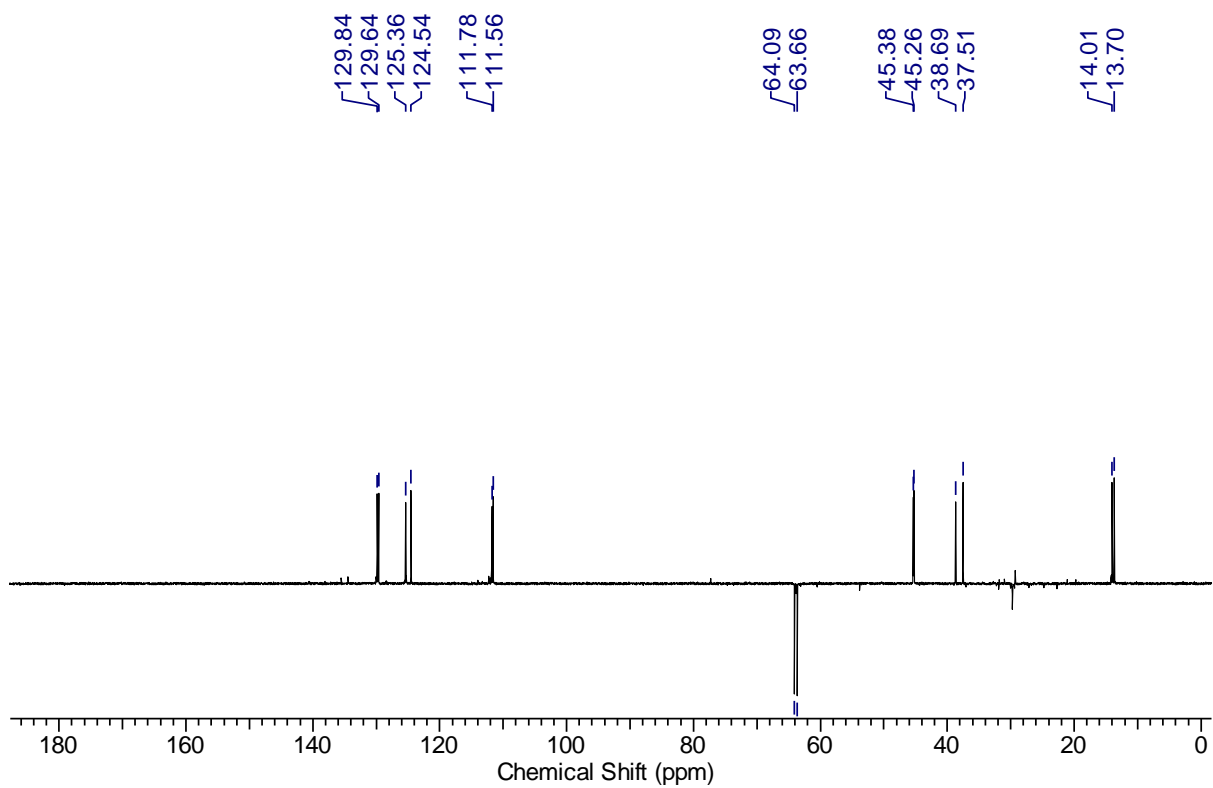

**<sup>1</sup>H NMR spectrum of compound 3Af (400 MHz, CDCl<sub>3</sub>)**

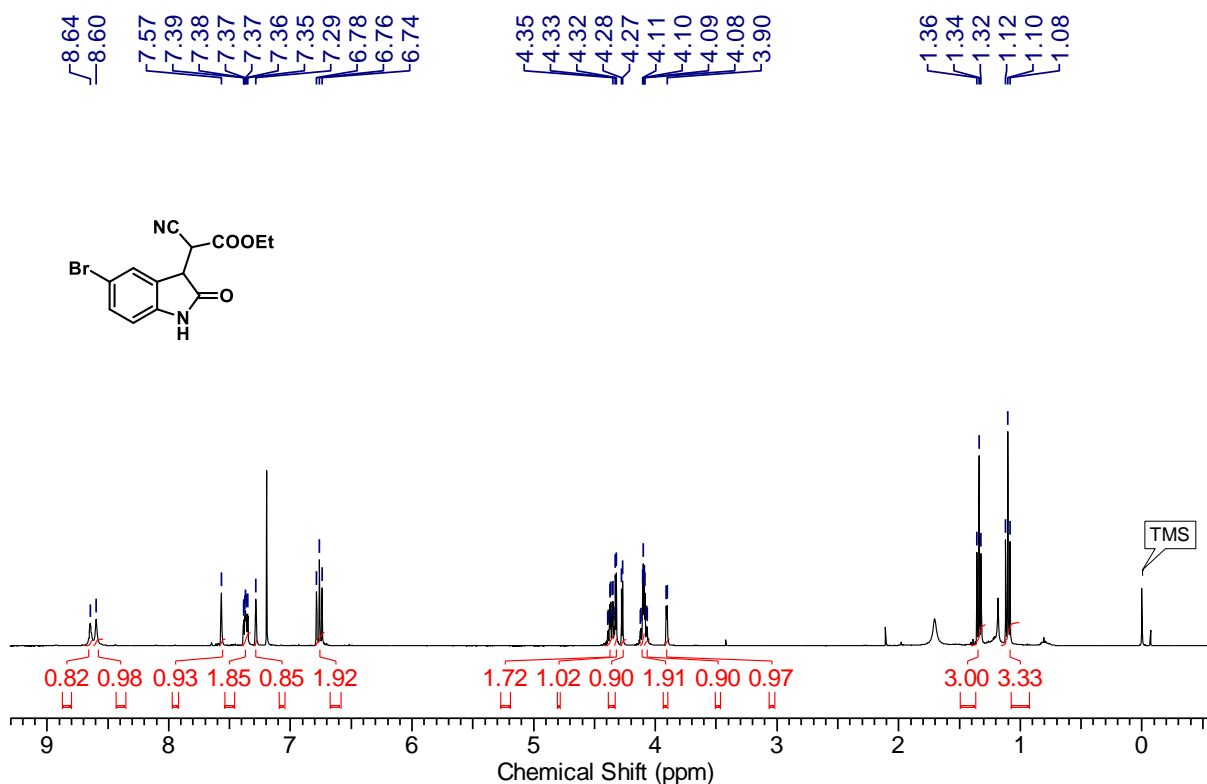

**<sup>13</sup>C NMR spectrum of compound 3Af (101 MHz, CDCl<sub>3</sub>)**

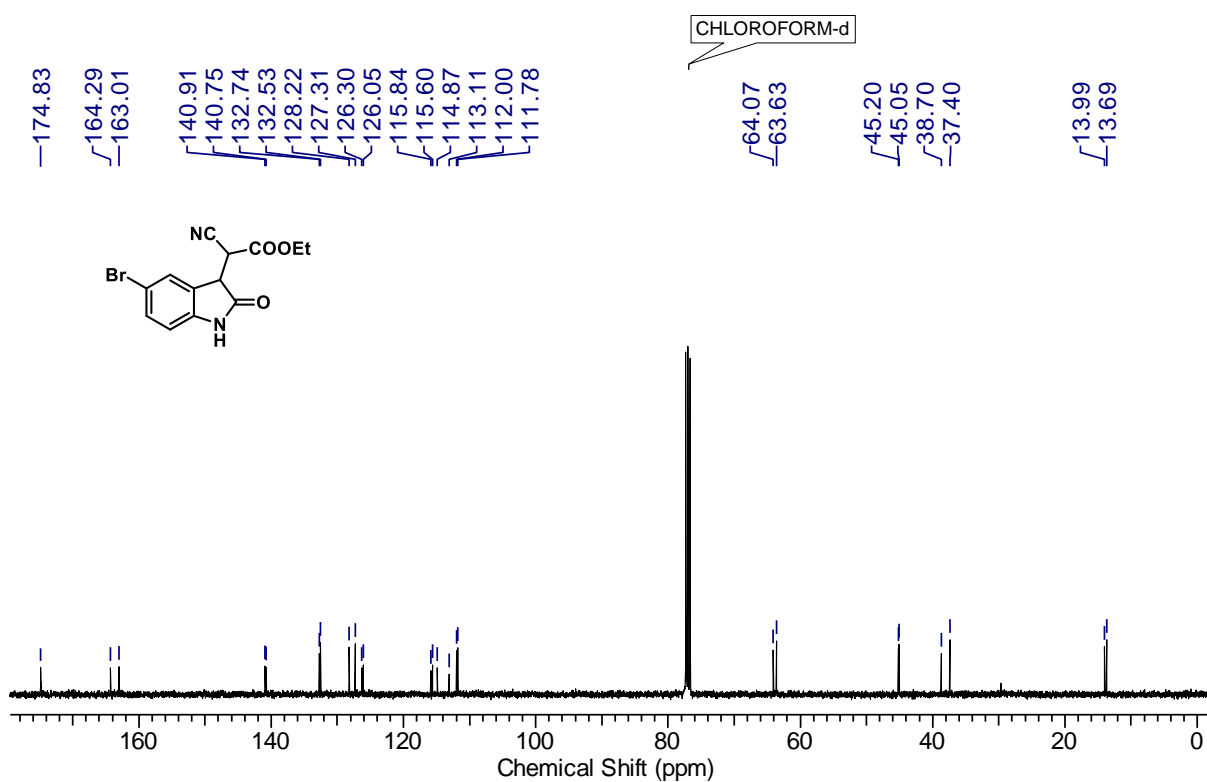

135 DEPT NMR spectrum of compound 3Af

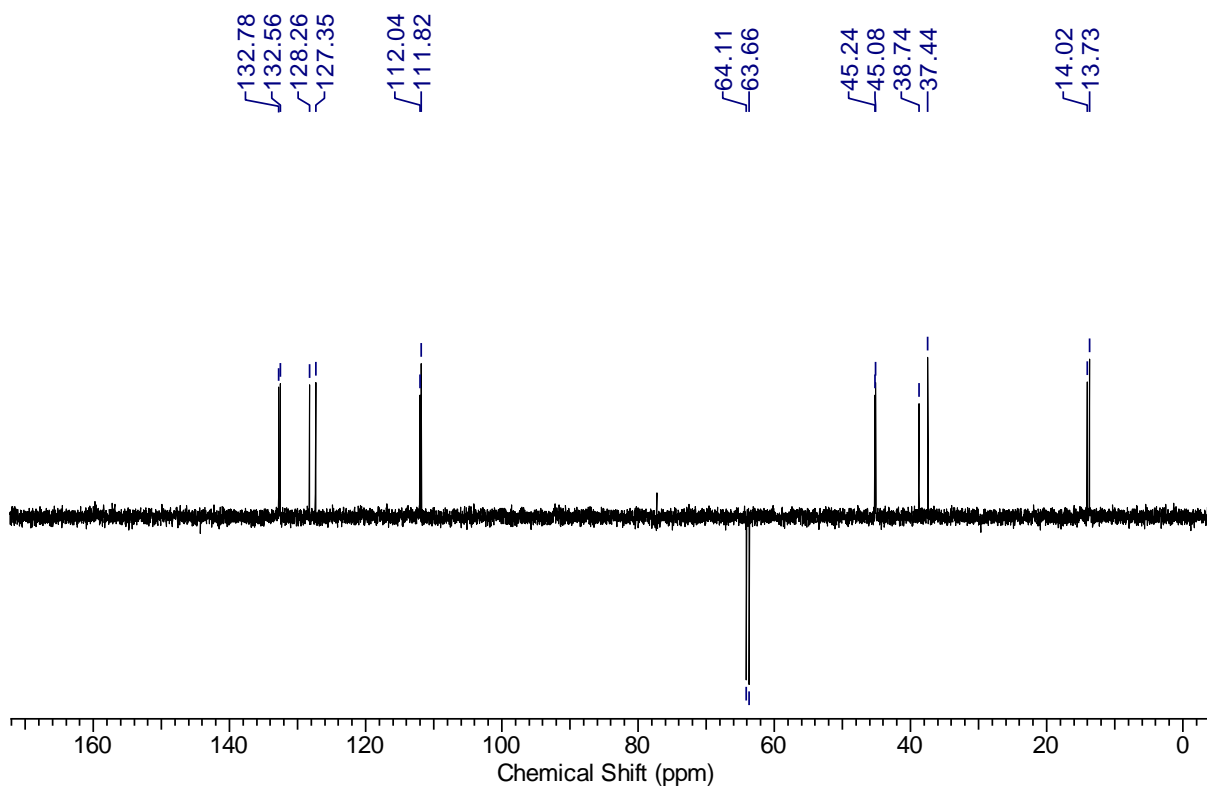

**<sup>1</sup>H NMR spectrum of compound 3Ag (400 MHz, CDCl<sub>3</sub>)**

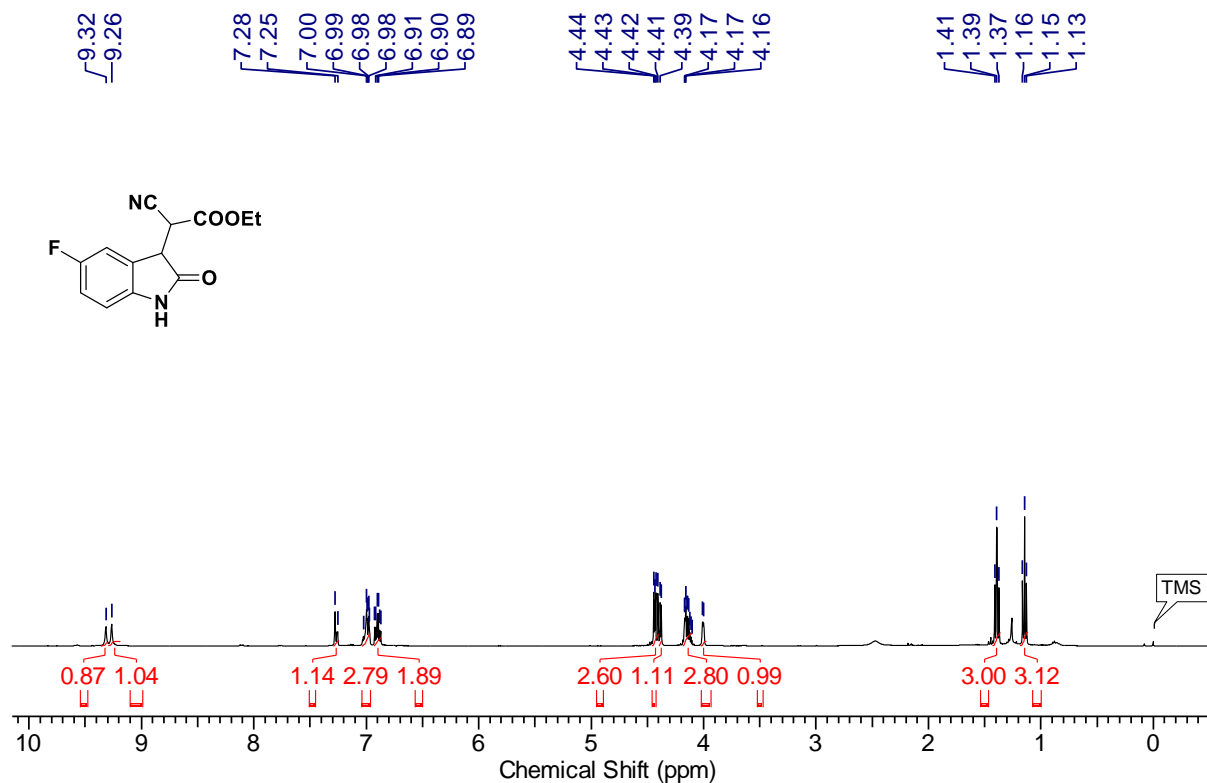

**<sup>13</sup>C NMR spectrum of compound 3Ag (101 MHz, CDCl<sub>3</sub>)**

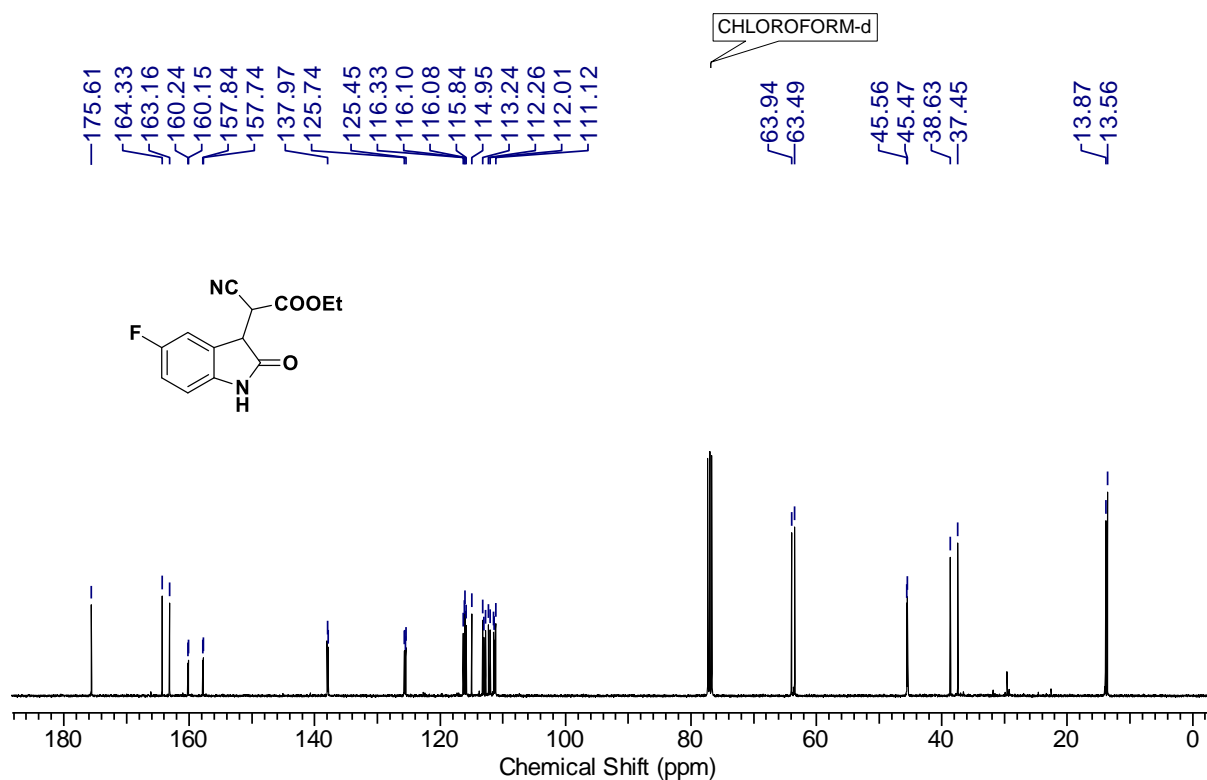

**<sup>13</sup>C DEPT NMR spectrum of compound 3Ag**

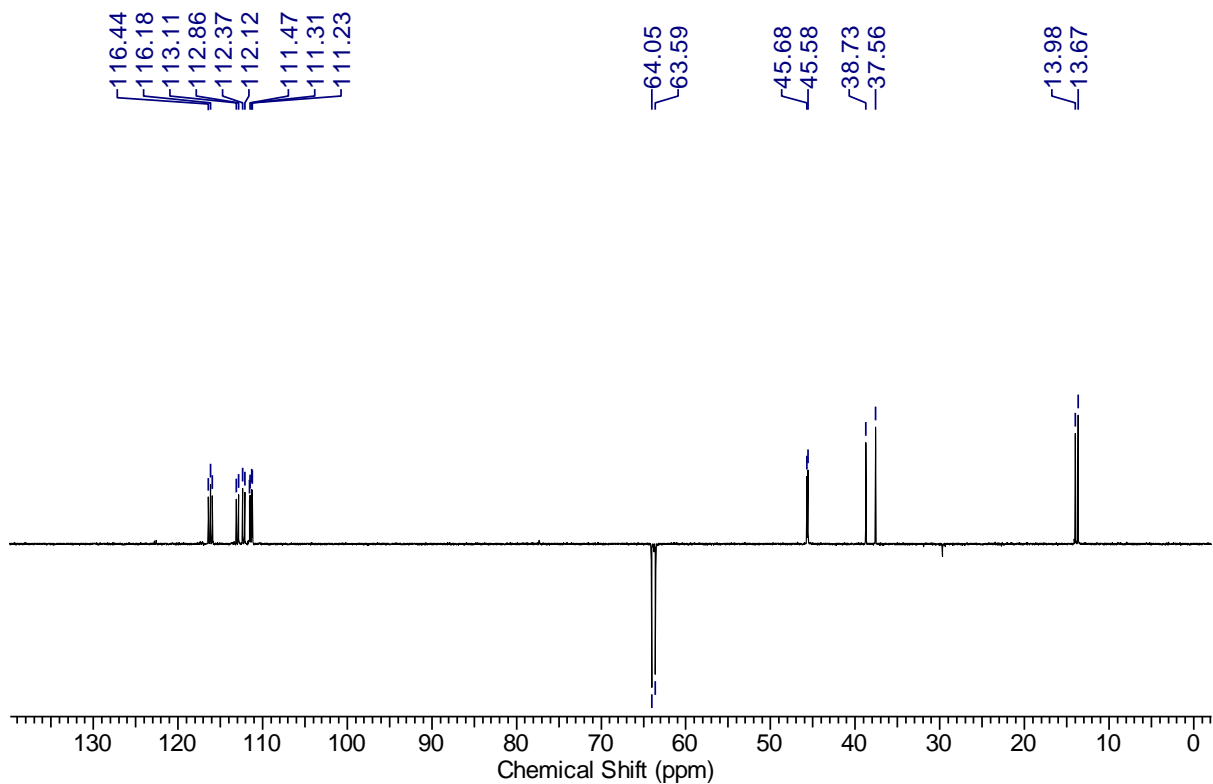

**<sup>19</sup>F spectrum of compound 3Ag**

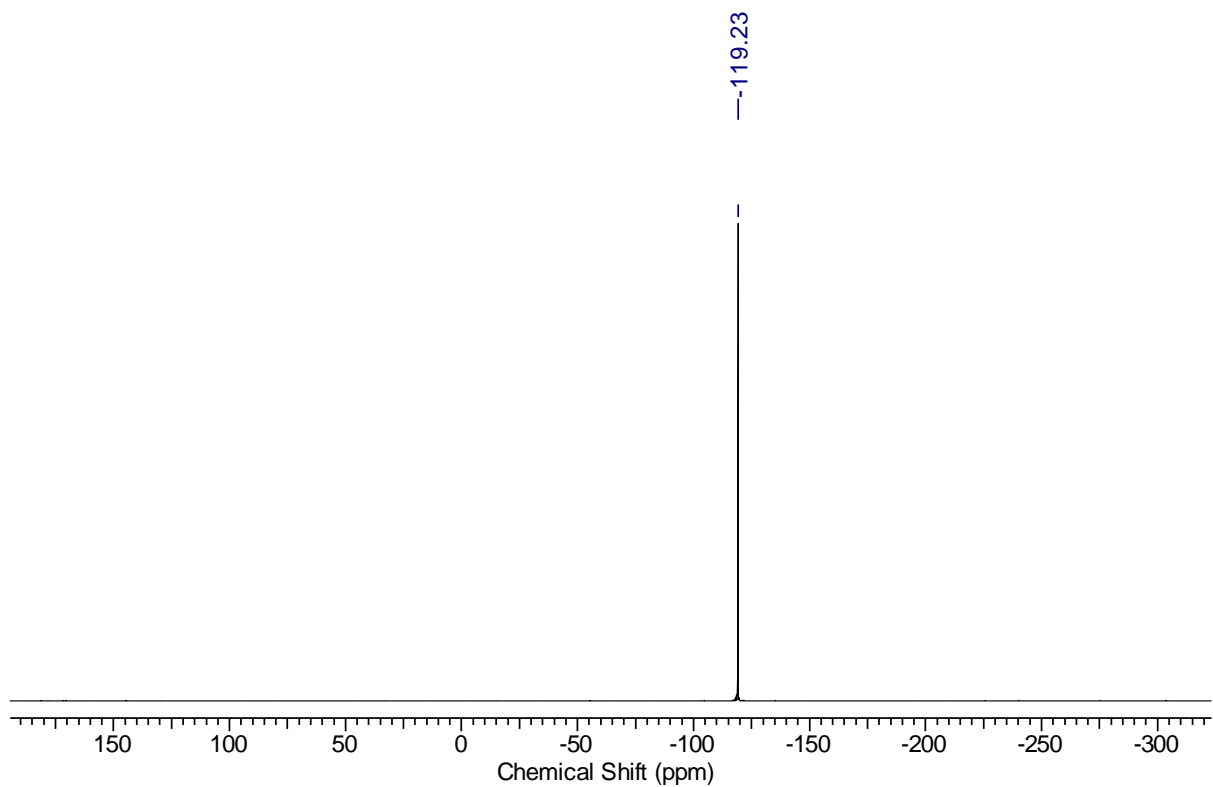

**<sup>1</sup>H NMR spectrum of compound 3Ah (400 MHz, CDCl<sub>3</sub>)**

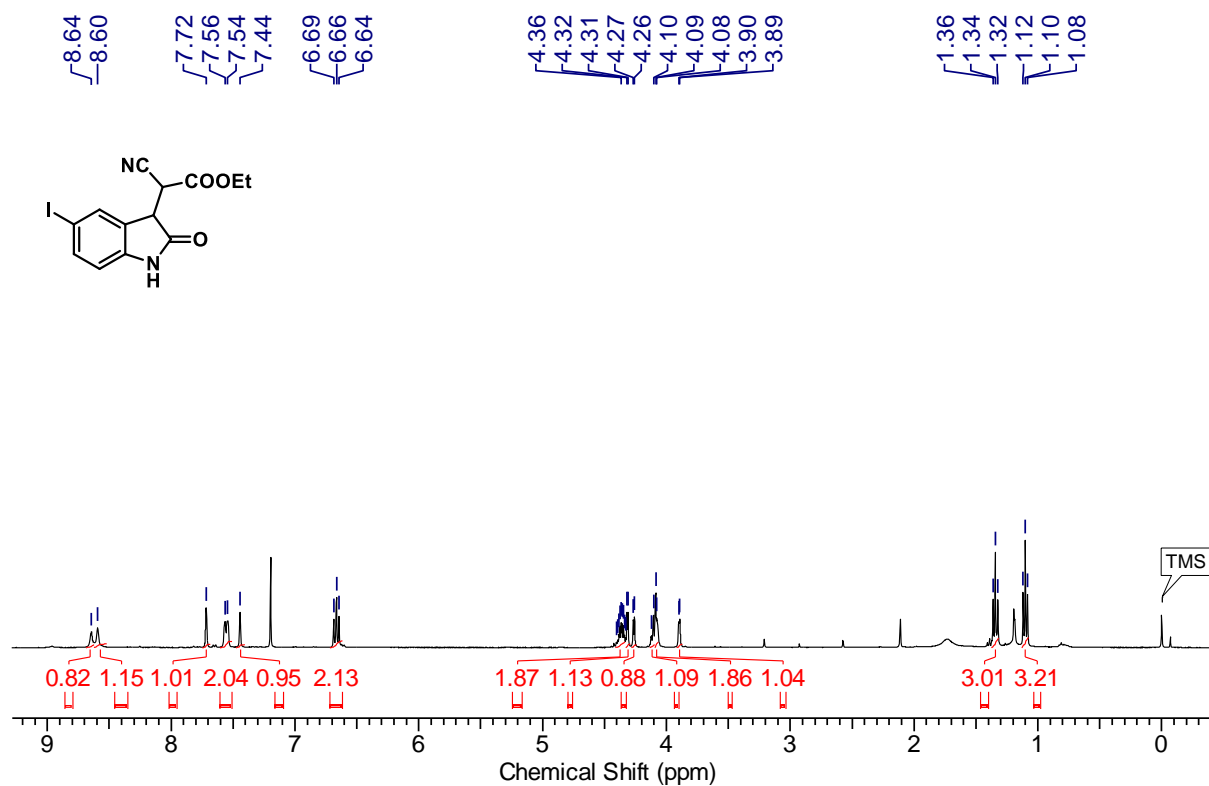

**<sup>13</sup>C NMR spectrum of compound 3Ah (101 MHz, CDCl<sub>3</sub>)**

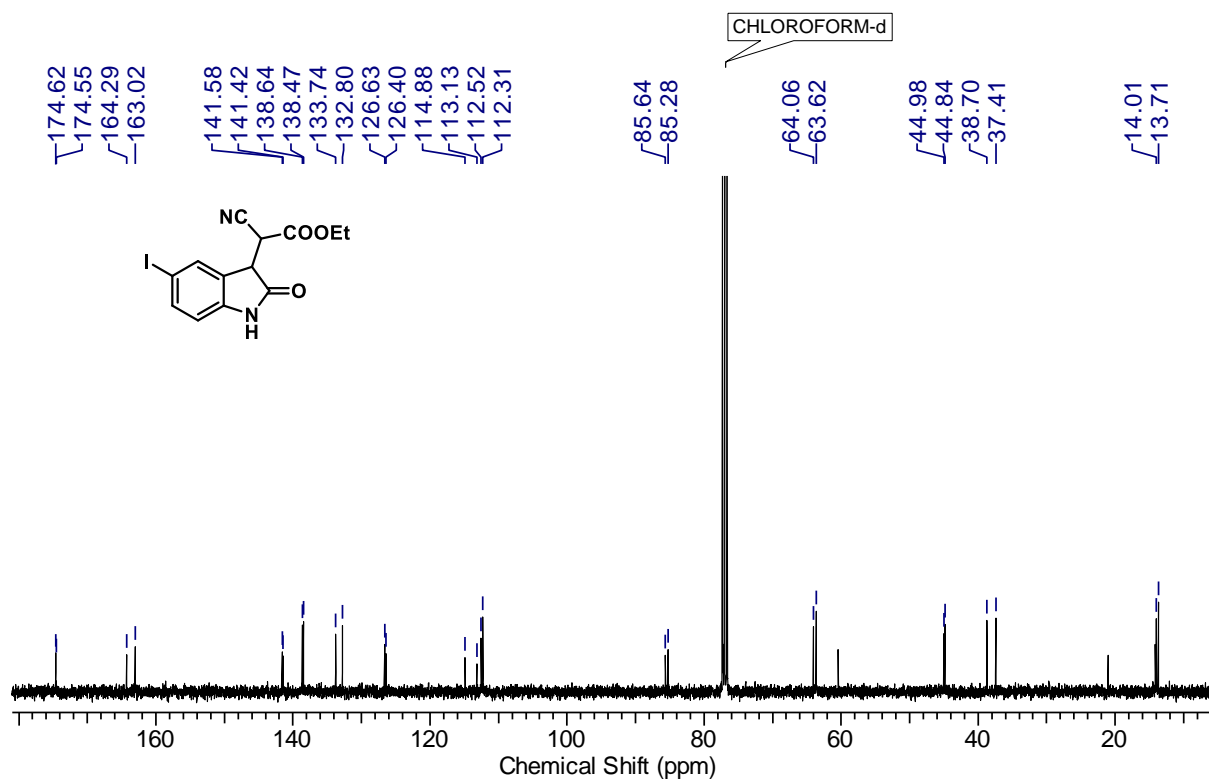

135 DEPT NMR spectrum of compound 3Ah

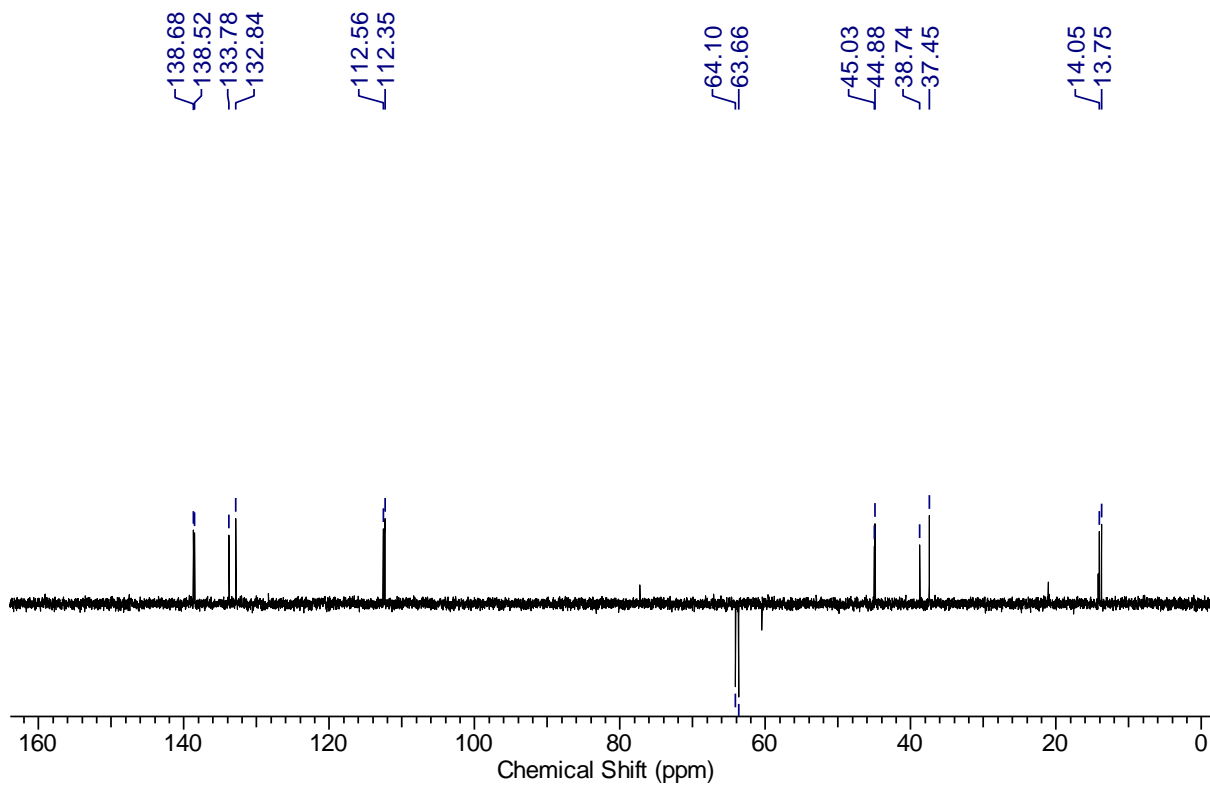

**<sup>1</sup>H NMR spectrum of compound 3Ai (400 MHz, CDCl<sub>3</sub>)**

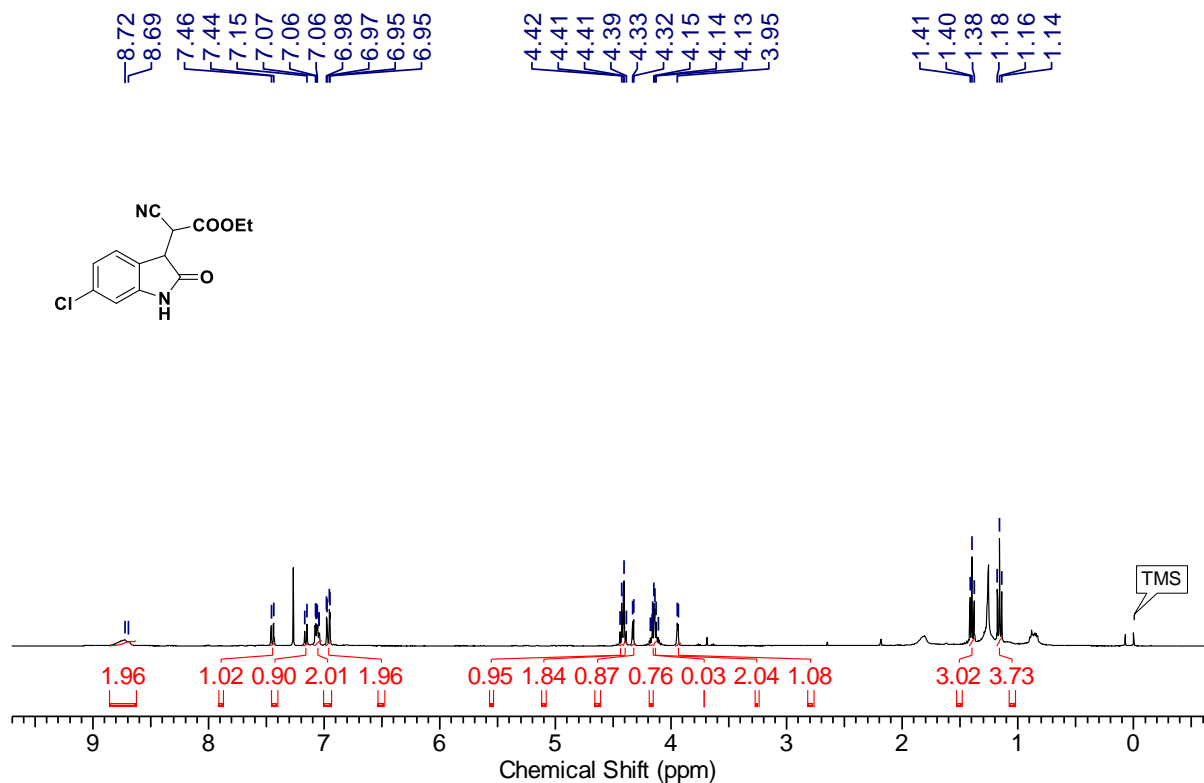

**<sup>13</sup>C NMR spectrum of compound 3Ai (101 MHz, CDCl<sub>3</sub>)**

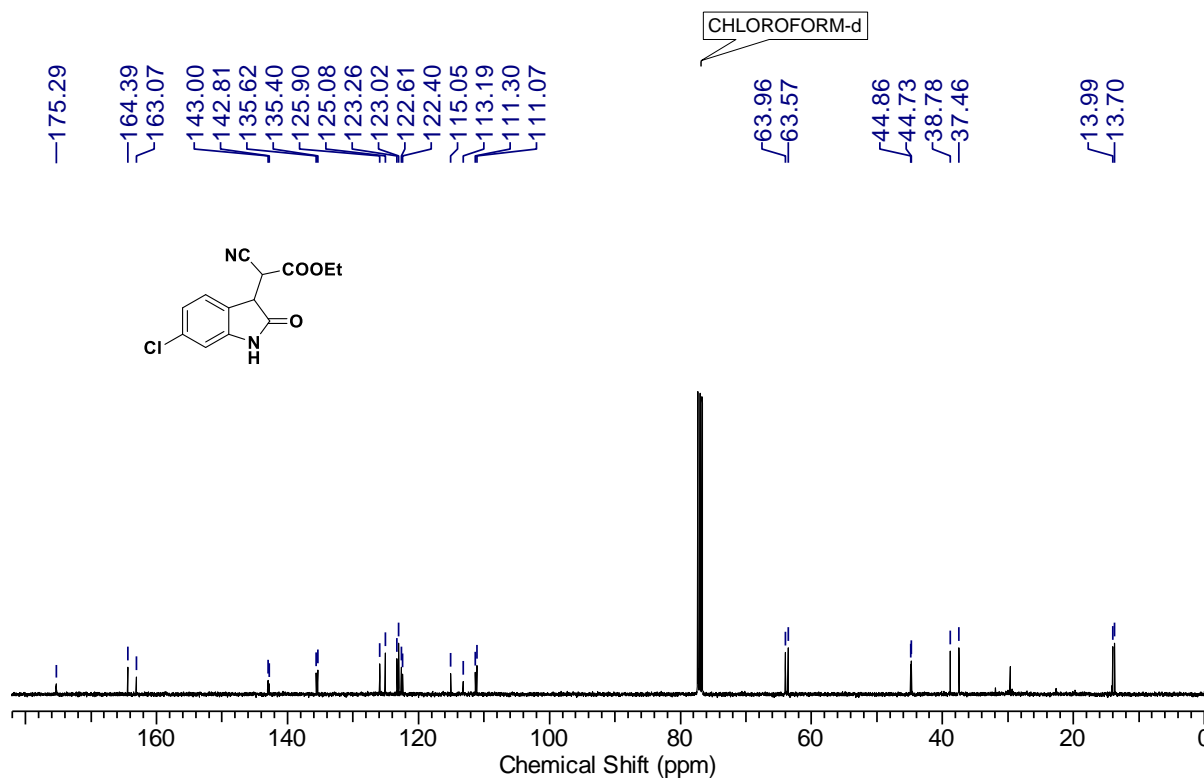

135 DEPT NMR spectrum of compound 3Ai

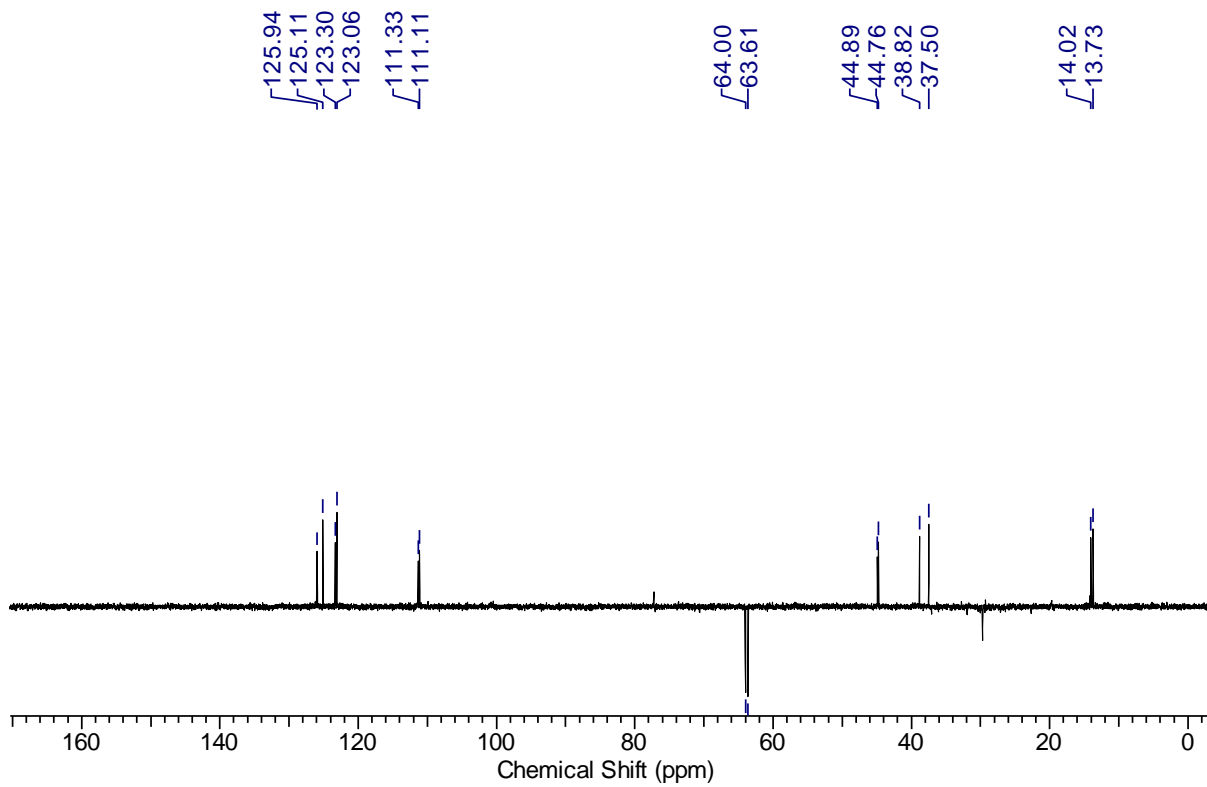

**<sup>1</sup>H NMR spectrum of compound 3Aj (400 MHz, CDCl<sub>3</sub>)**

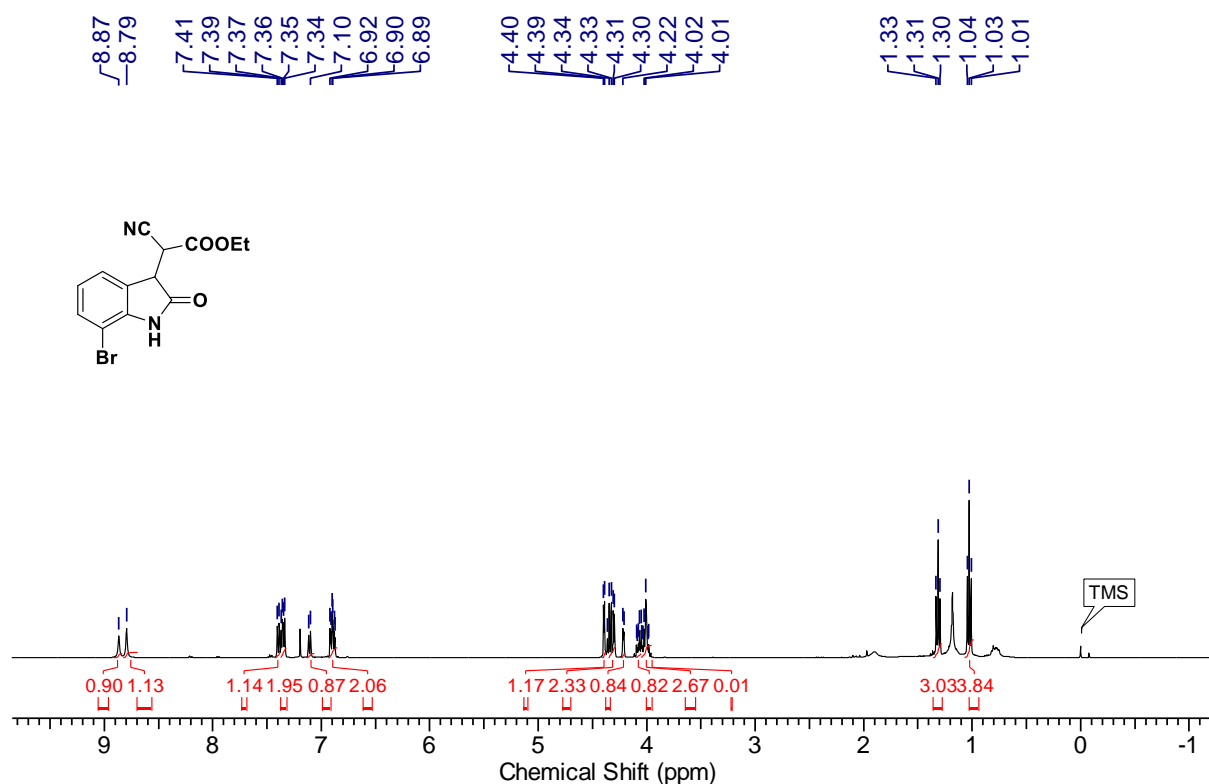

**<sup>13</sup>C NMR spectrum of compound 3Aj (101 MHz, CDCl<sub>3</sub>)**

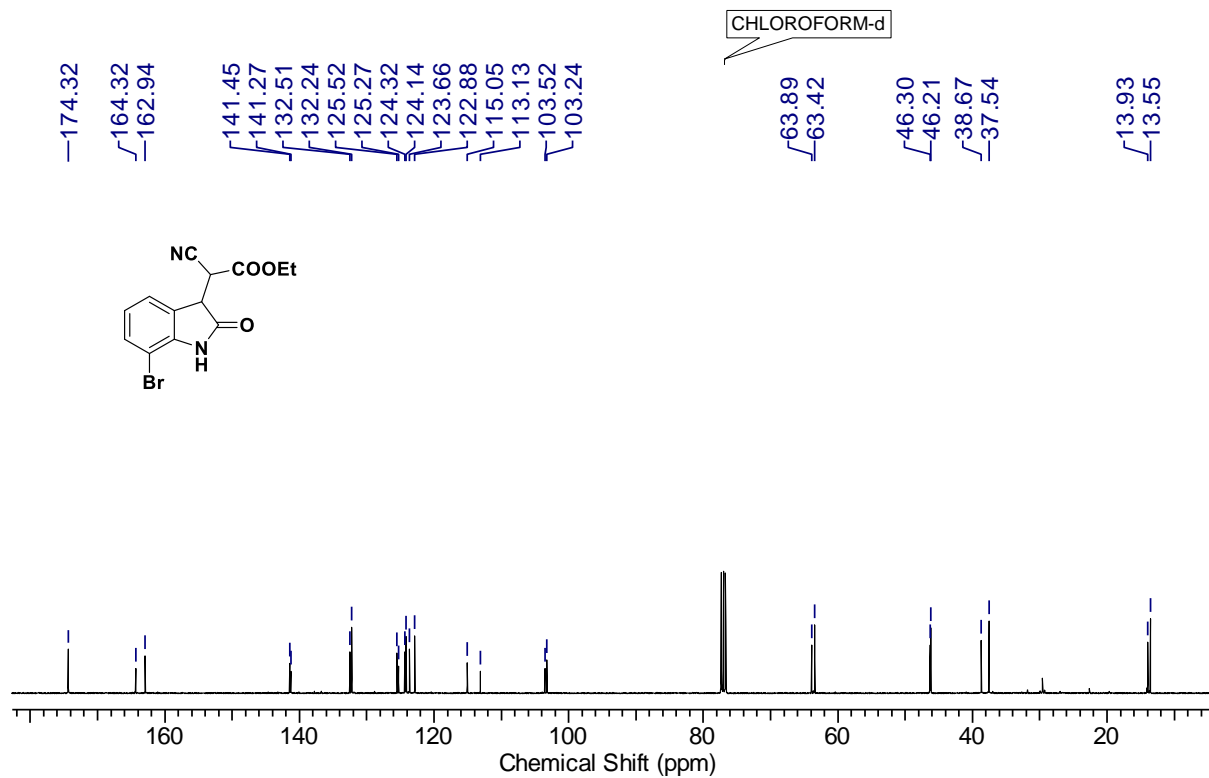

### 135 DEPT NMR spectrum of compound 3Aj

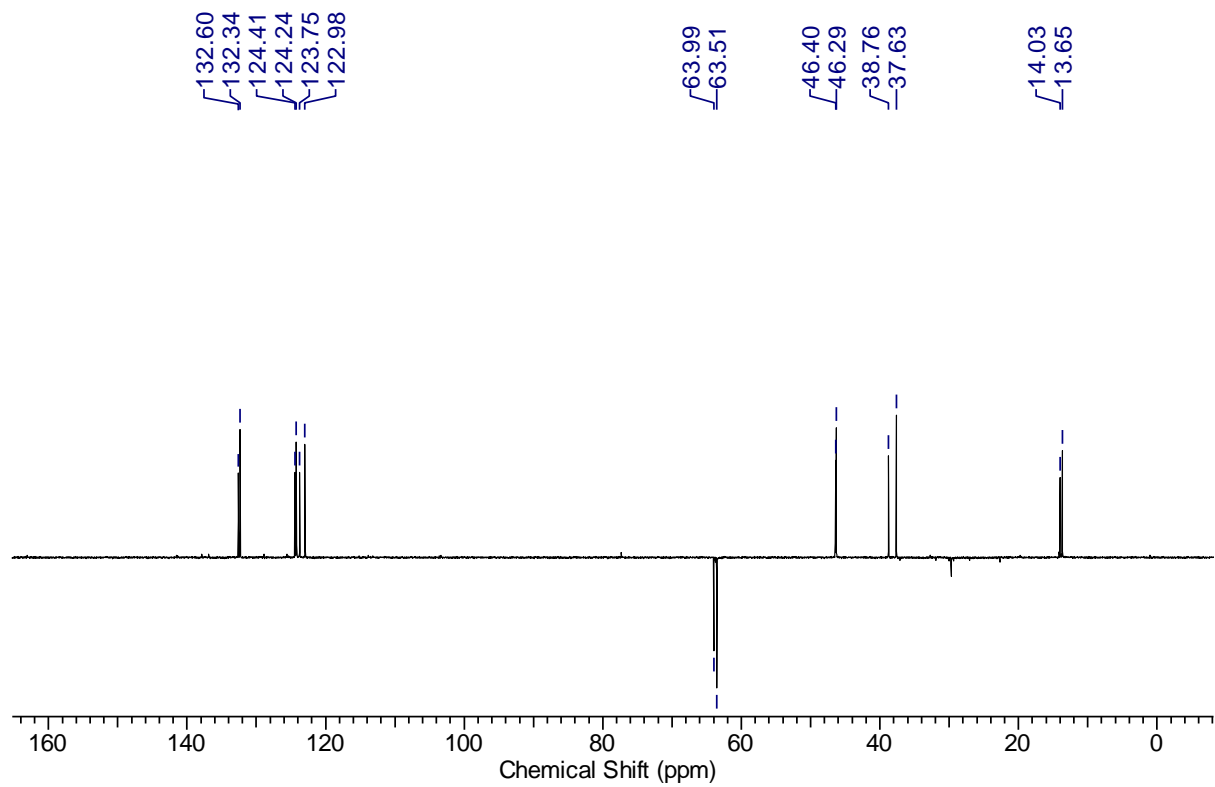

**<sup>1</sup>H NMR spectrum of compound 3Ak (400 MHz, CDCl<sub>3</sub>)**

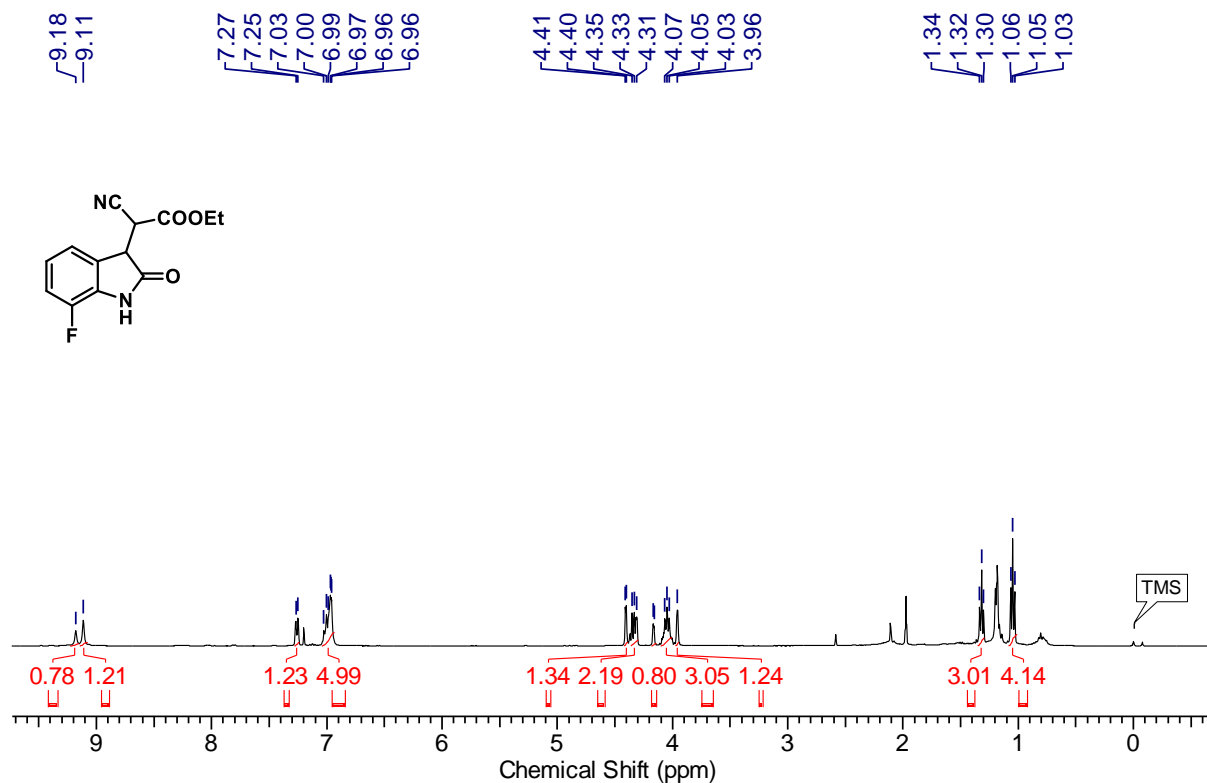

**<sup>13</sup>C NMR spectrum of compound 3Ak (101 MHz, CDCl<sub>3</sub>)**

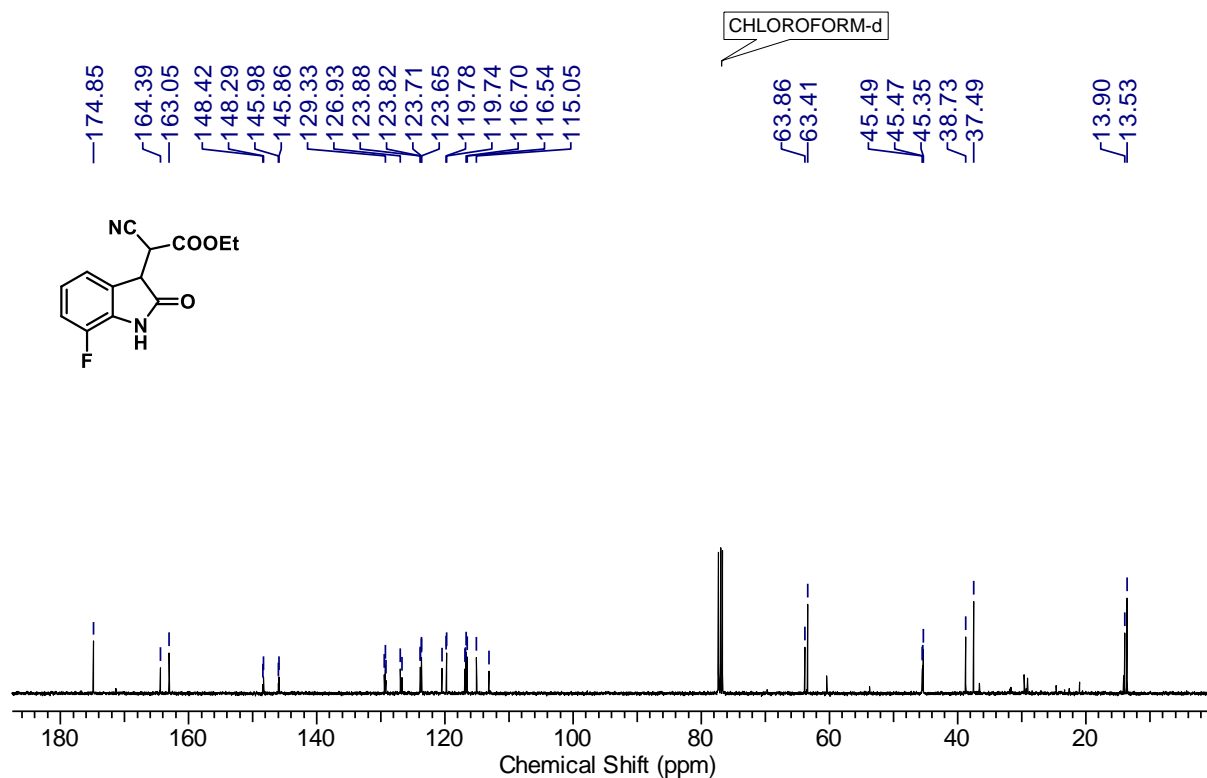

### 135 DEPT NMR spectrum of compound 3Ak

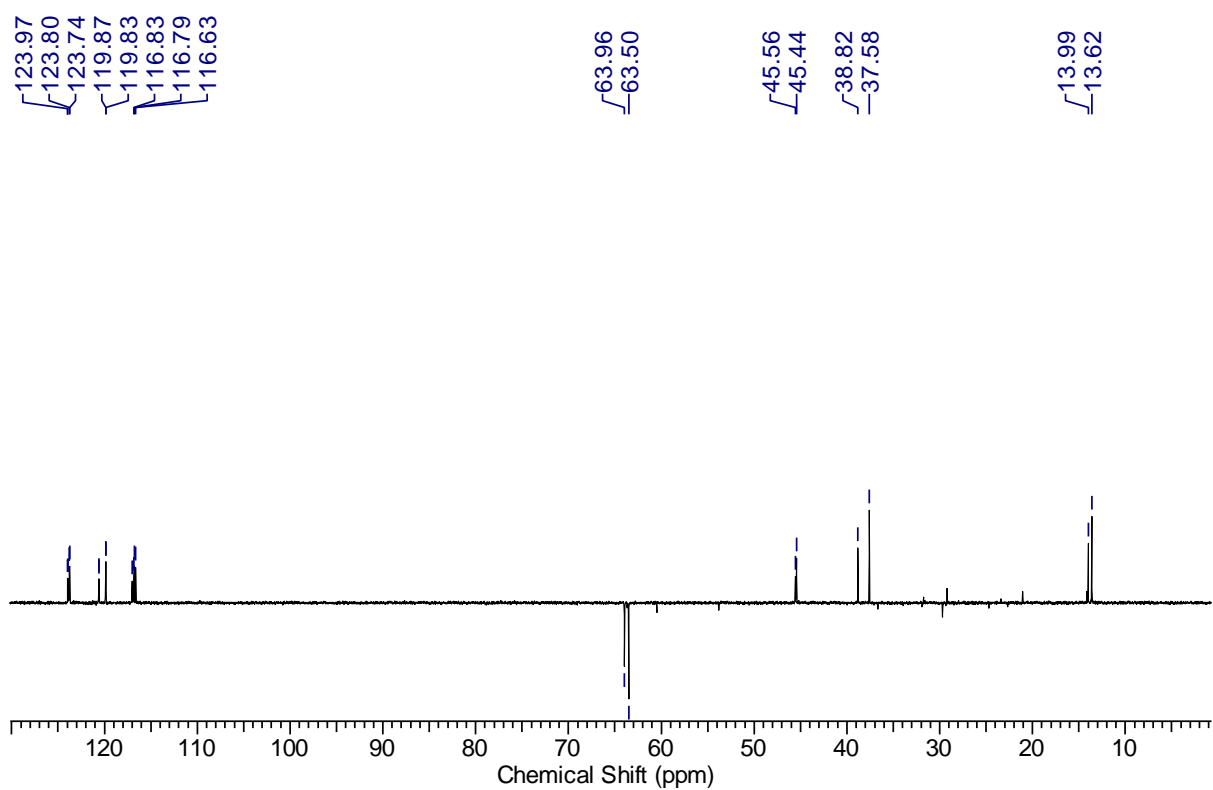

### <sup>19</sup>F spectrum of compound 3Ak

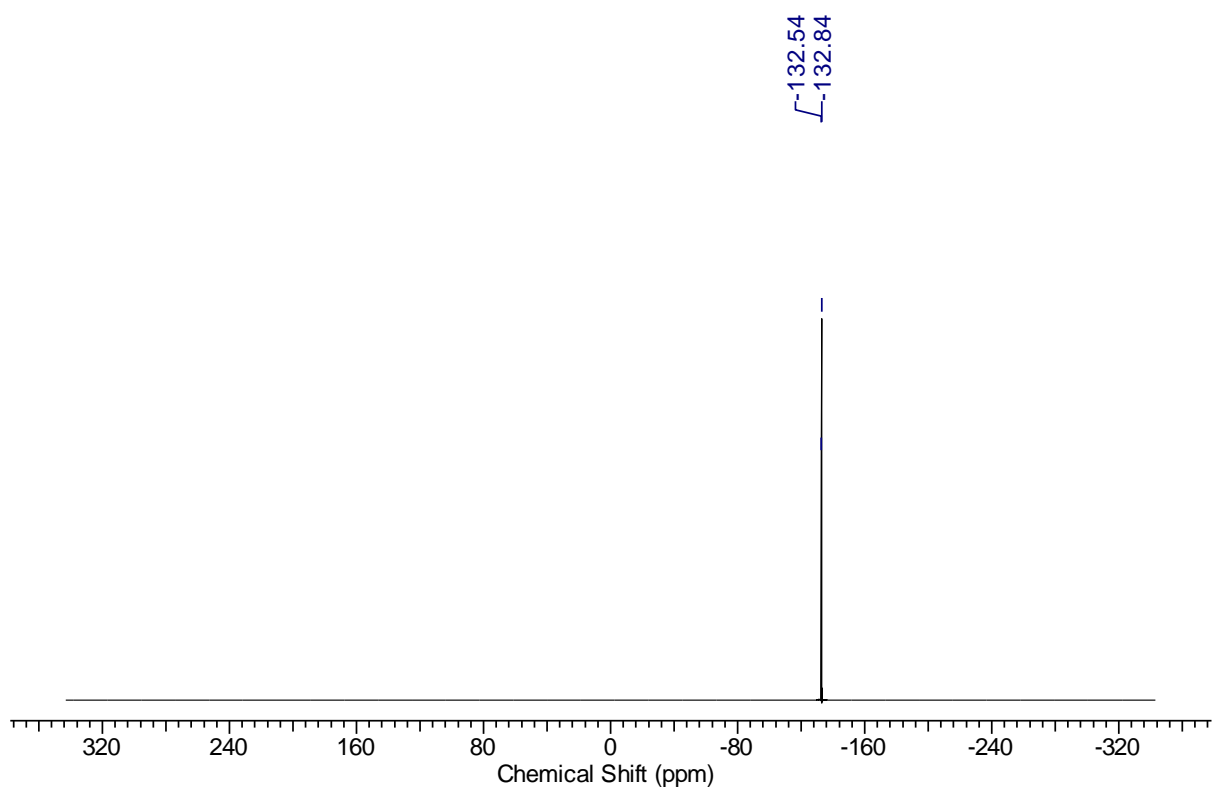

**<sup>1</sup>H NMR spectrum of compound 3AI (400 MHz, CDCl<sub>3</sub>)**

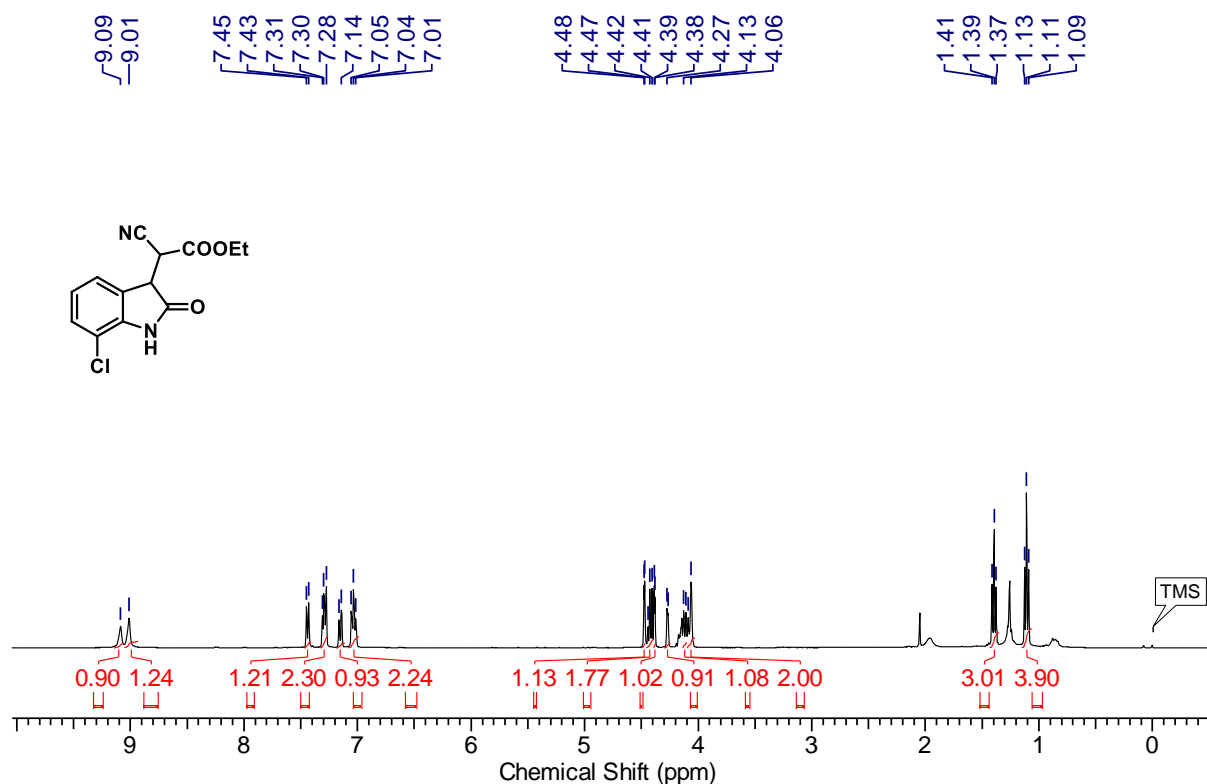

**<sup>13</sup>C NMR spectrum of compound 3AI (101 MHz, CDCl<sub>3</sub>)**

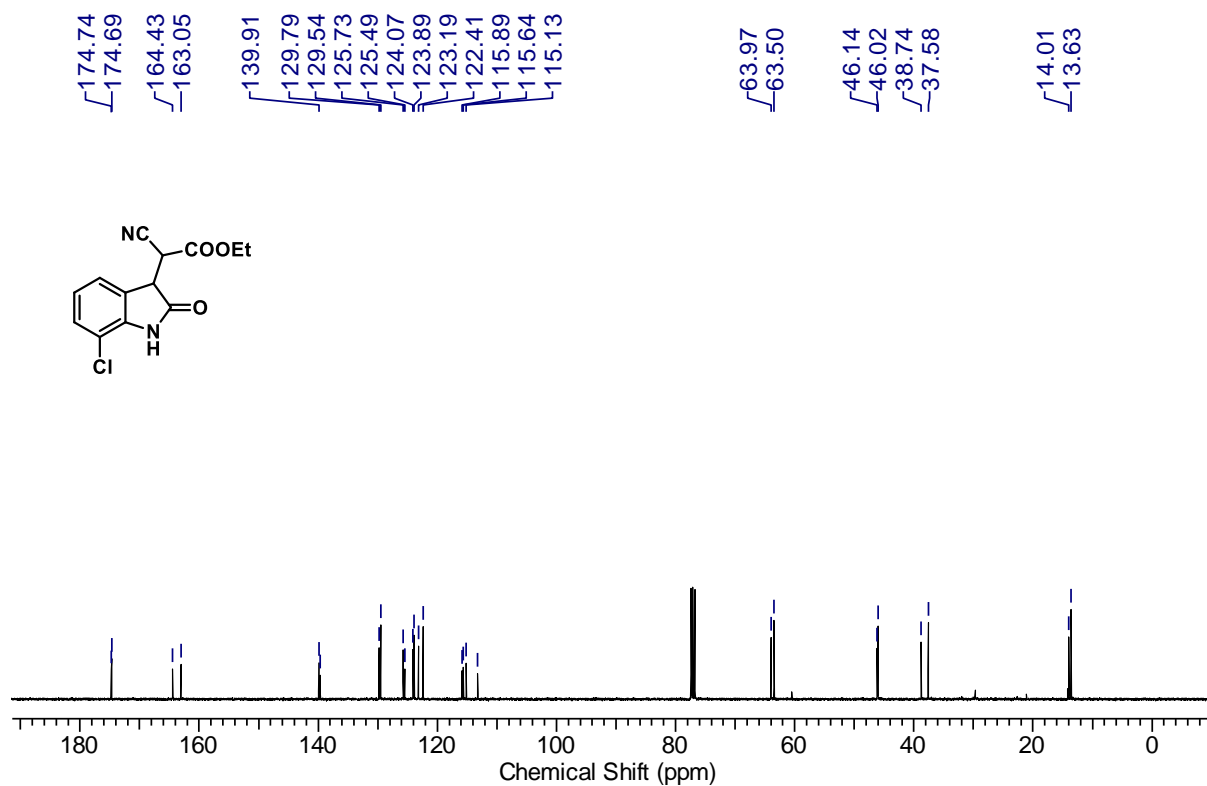

135 DEPT NMR spectrum of compound 3AI

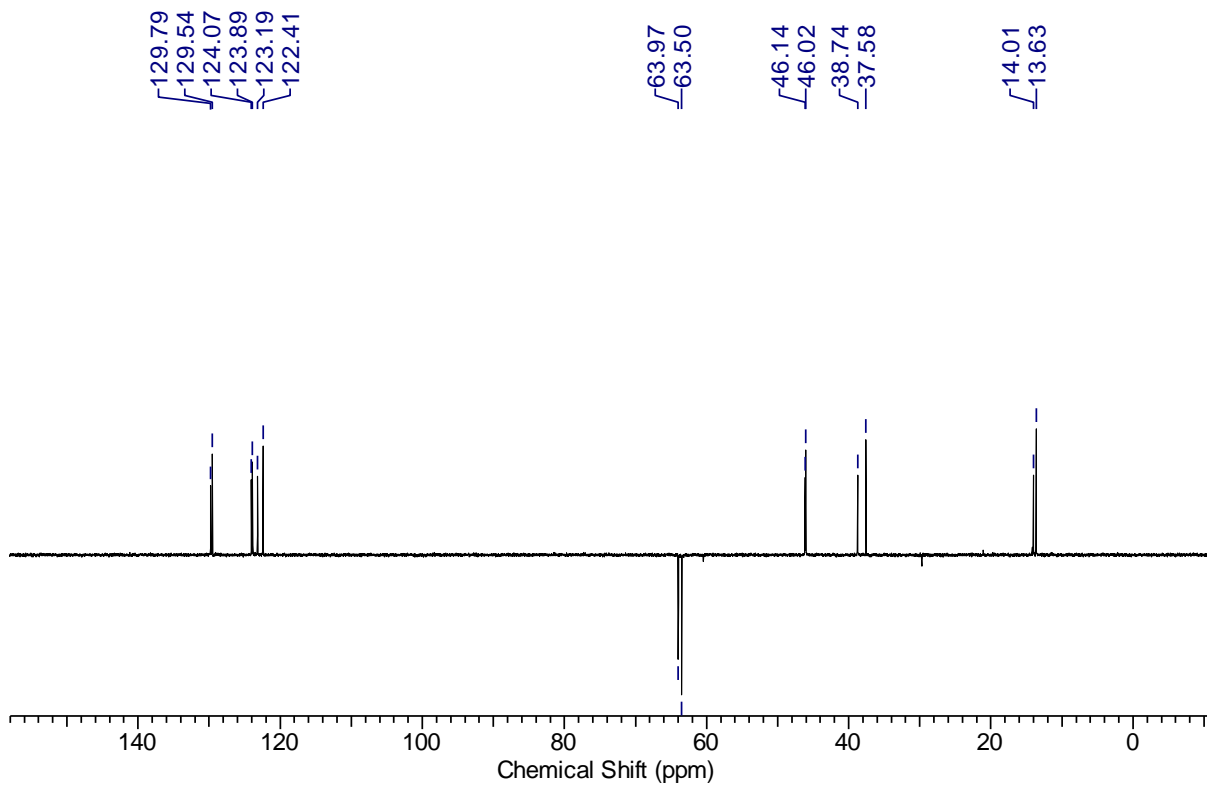

**<sup>1</sup>H NMR spectrum of compound 3Am (400 MHz, CDCl<sub>3</sub>)**

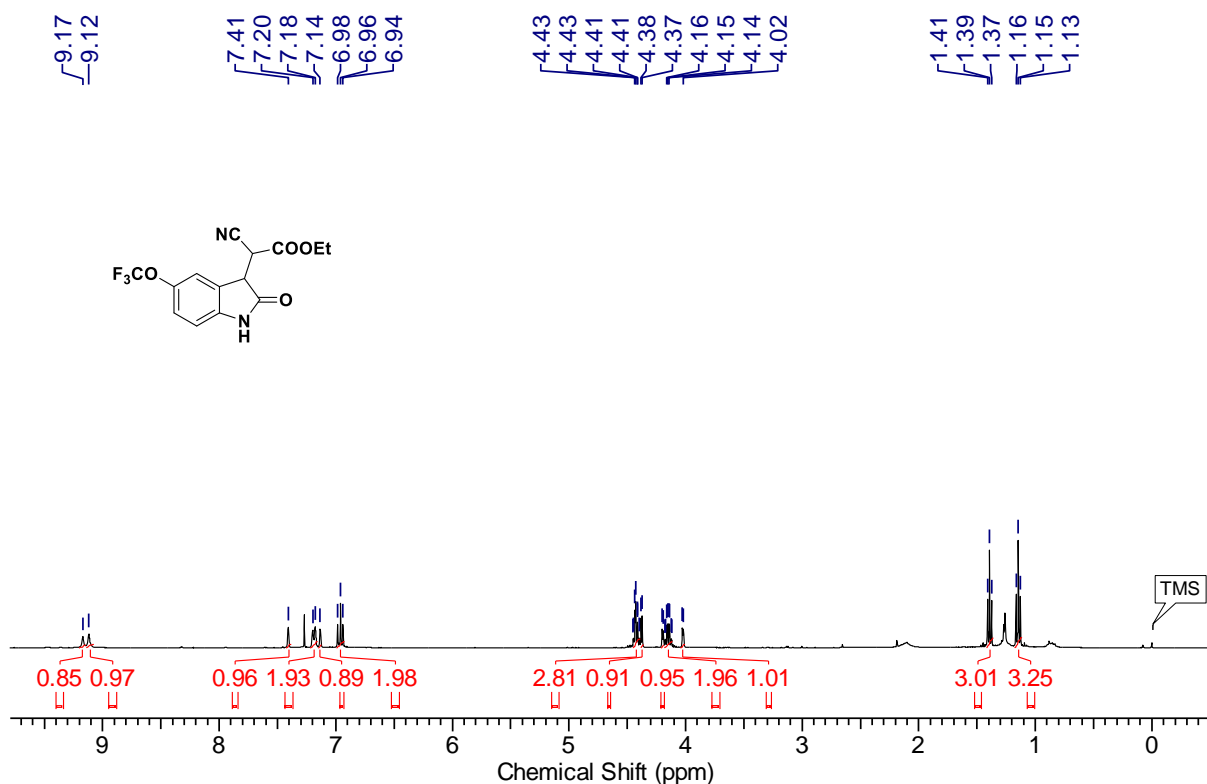

**<sup>13</sup>C NMR spectrum of compound 3Am (101 MHz, CDCl<sub>3</sub>)**

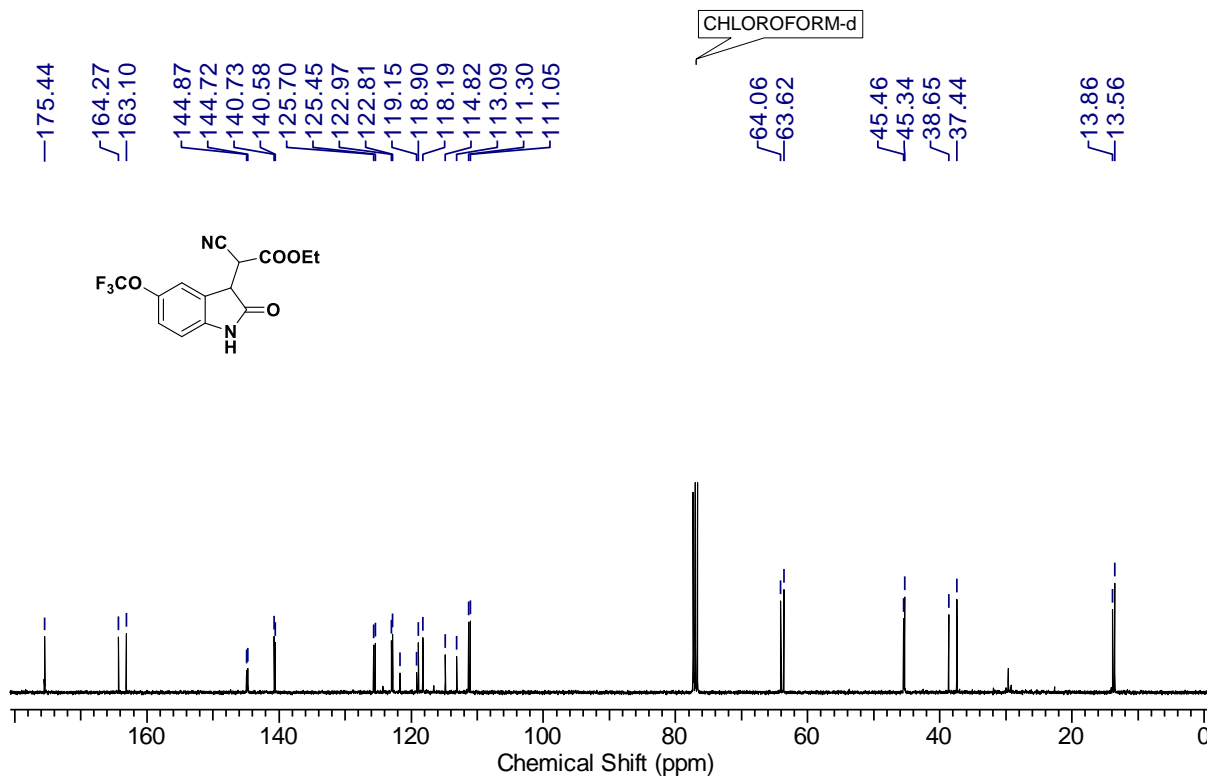

**135 DEPT NMR spectrum of compound 3Am**

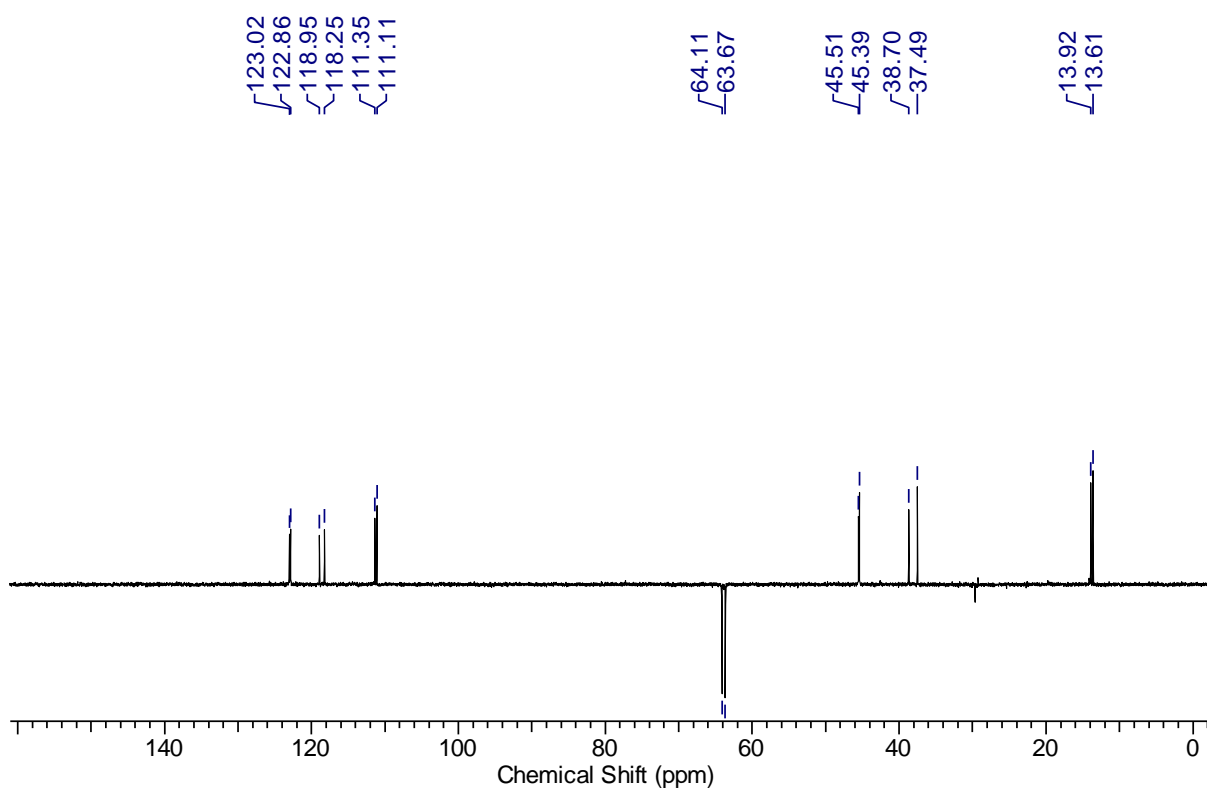

**<sup>19</sup>F spectrum of compound 3Am**

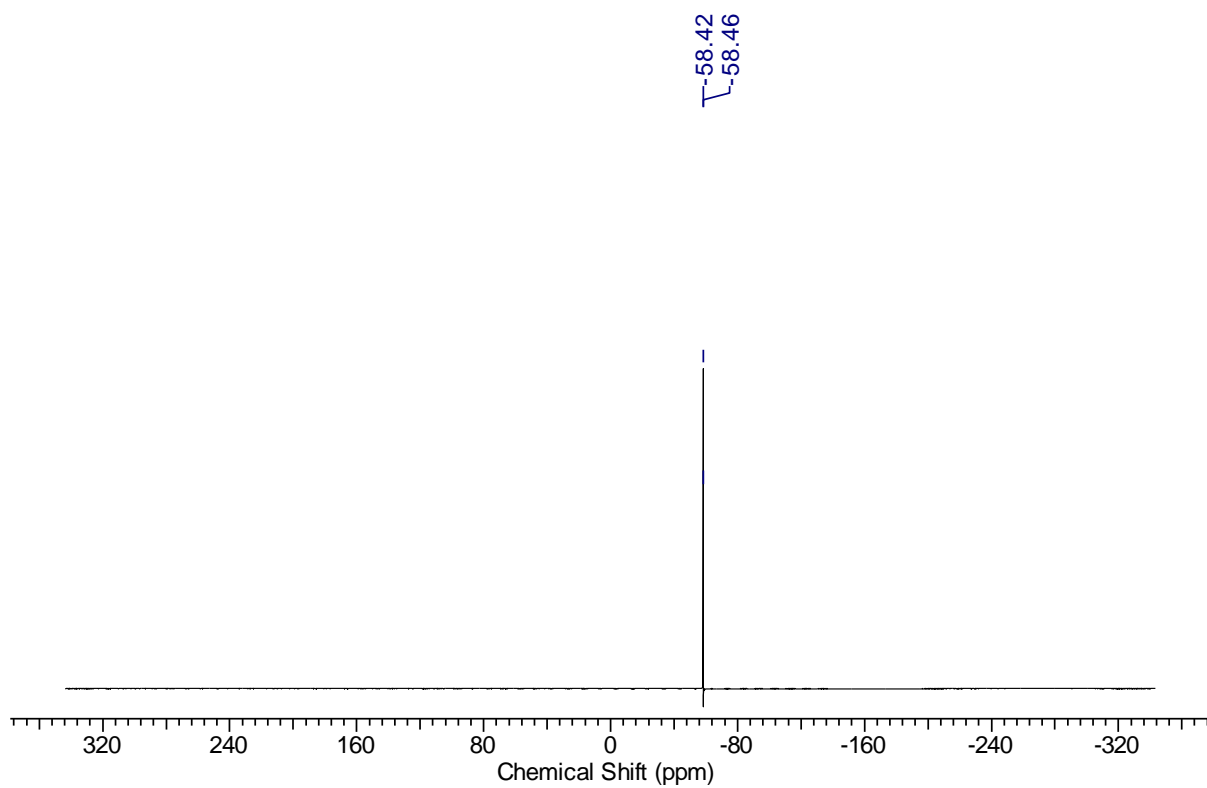

### <sup>1</sup>H NMR spectrum of compound 3An (400 MHz, CDCl<sub>3</sub>)

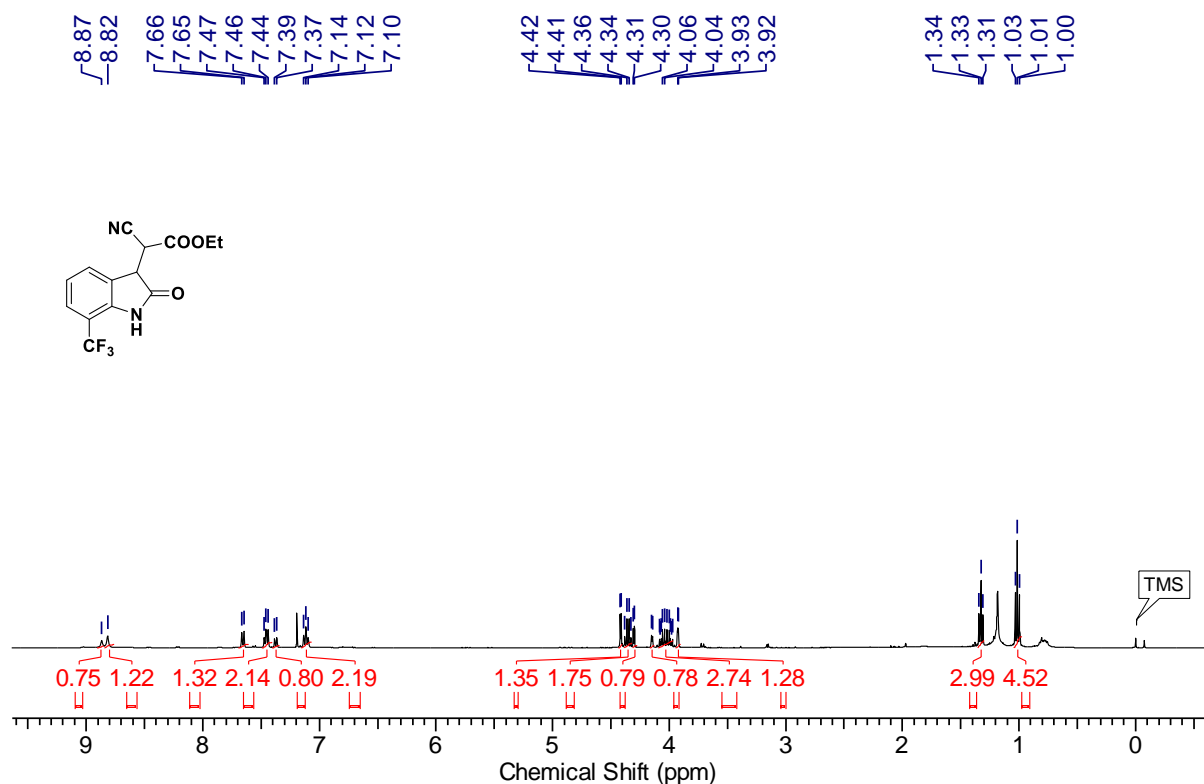

### <sup>13</sup>C NMR spectrum of compound 3An (101 MHz, CDCl<sub>3</sub>)

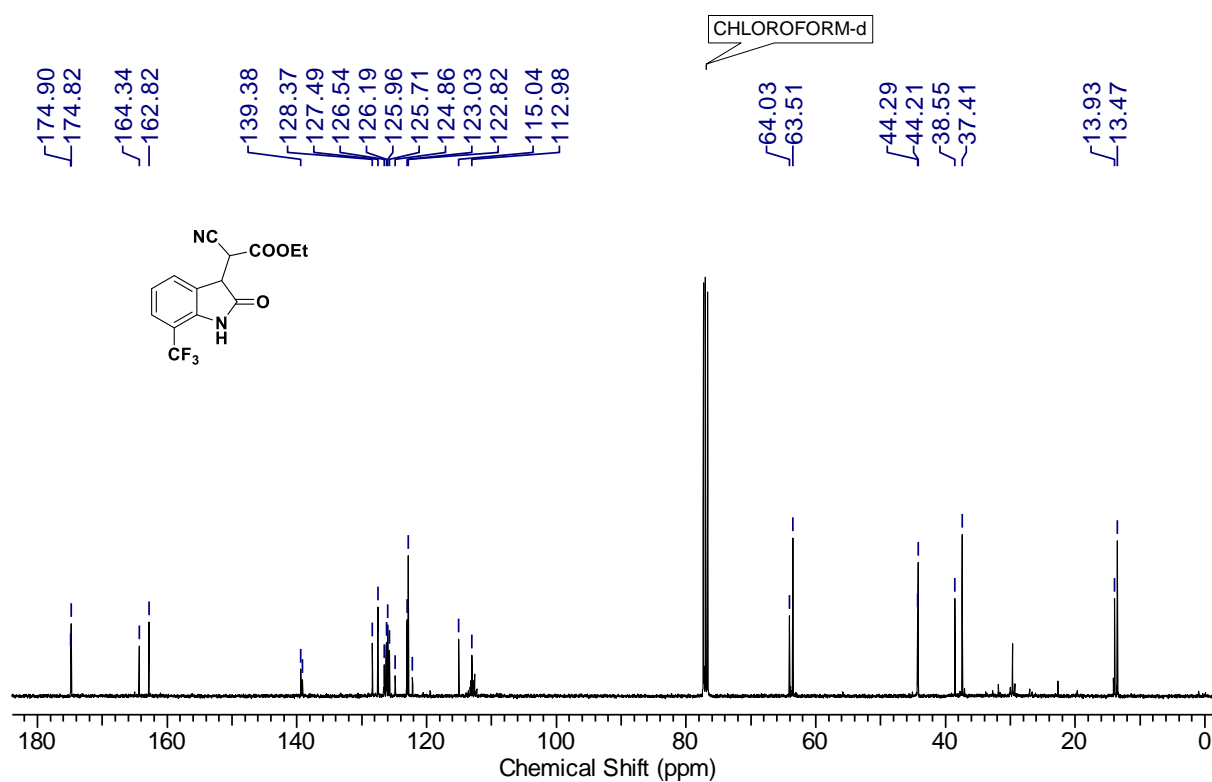

**135 DEPT NMR spectrum of compound 3An**

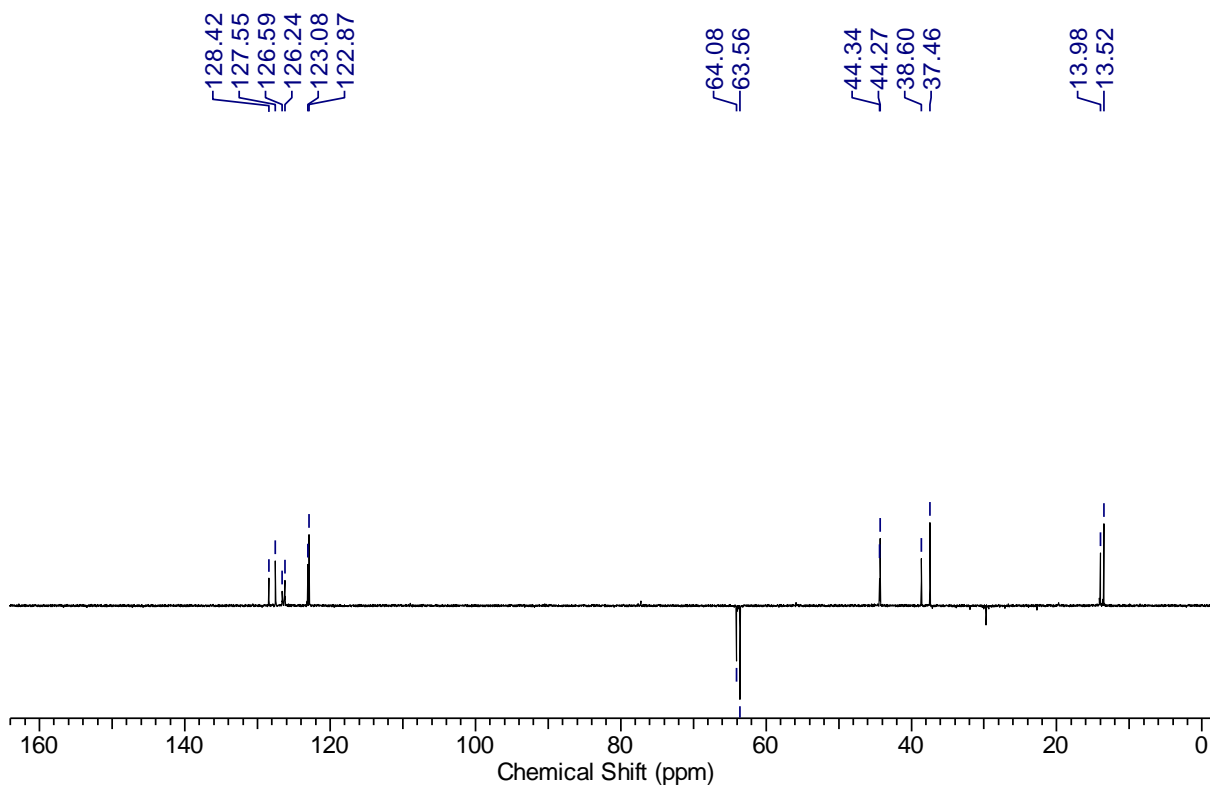

**<sup>19</sup>F spectrum of compound 3An**

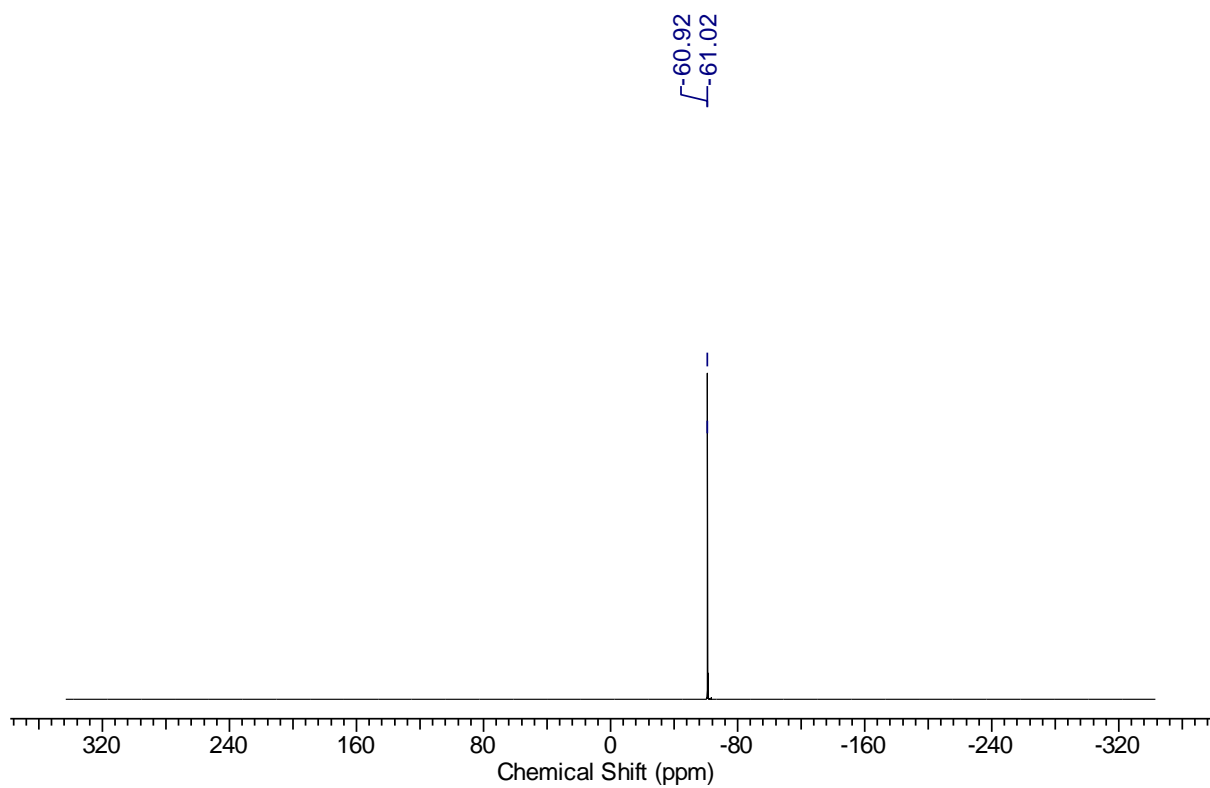

**<sup>1</sup>H NMR spectrum of compound 3Ao (400 MHz, CDCl<sub>3</sub>)**

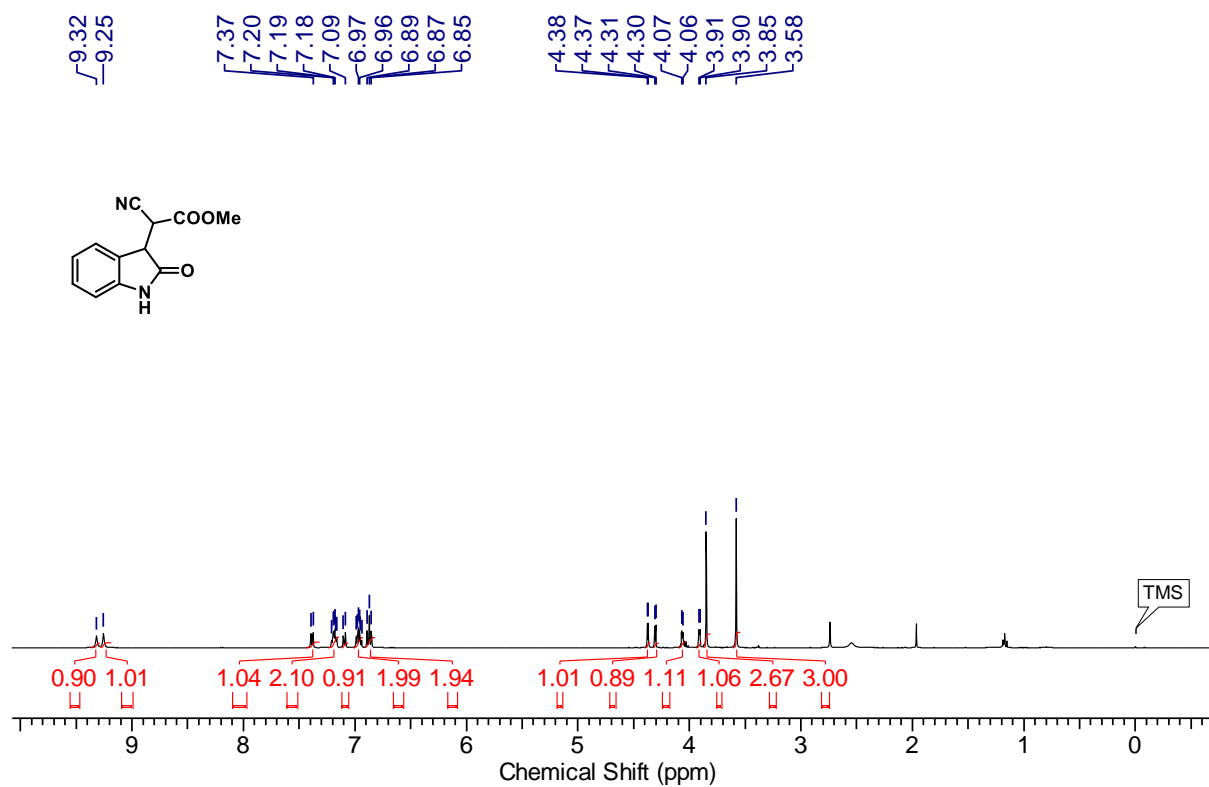

**<sup>13</sup>C NMR spectrum of compound 3Ao (101 MHz, CDCl<sub>3</sub>)**

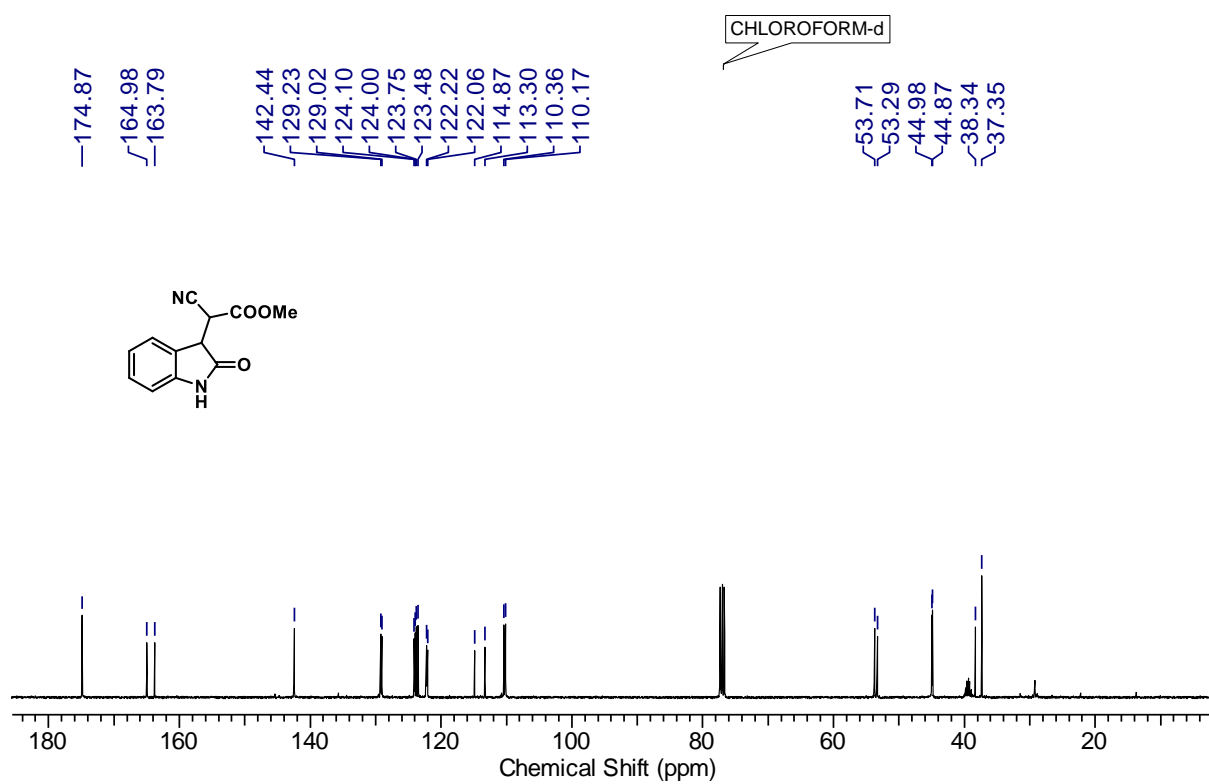

135 DEPT NMR spectrum of compound 3Ao

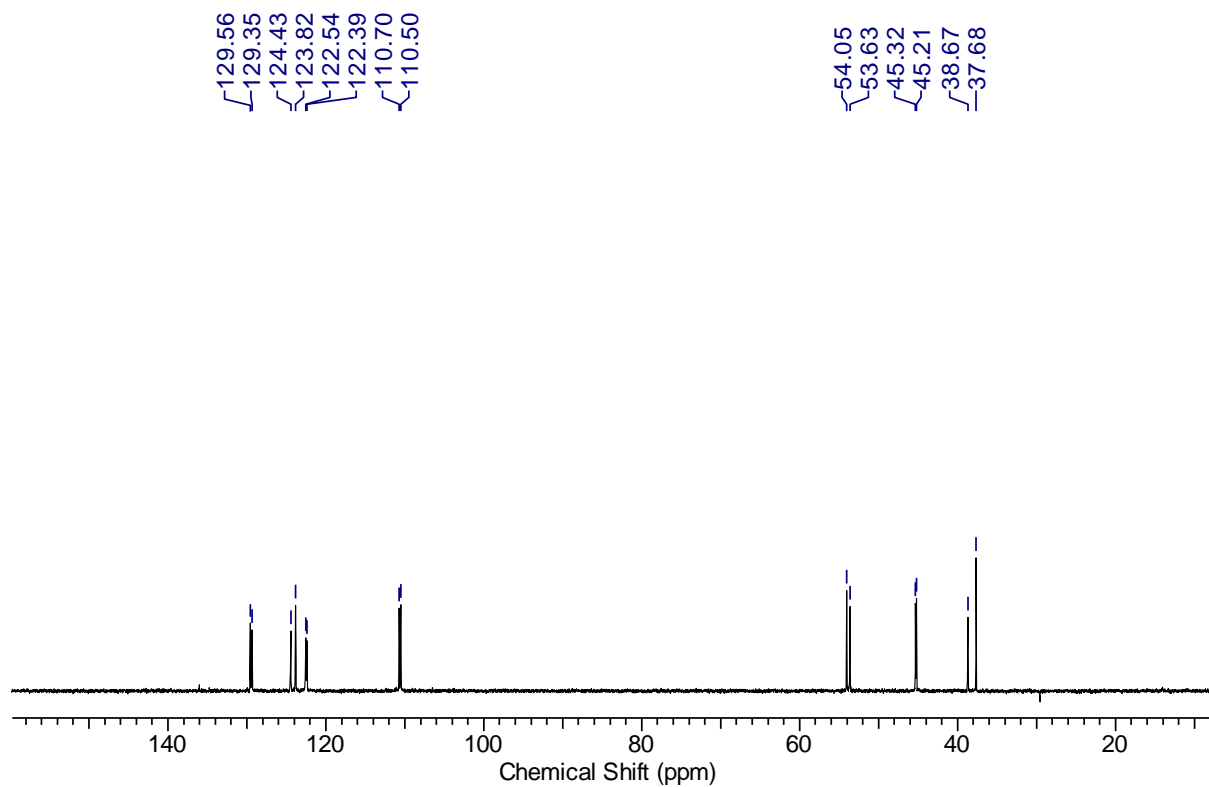

**<sup>1</sup>H NMR spectrum of compound 3Ap (400 MHz, CDCl<sub>3</sub>)**

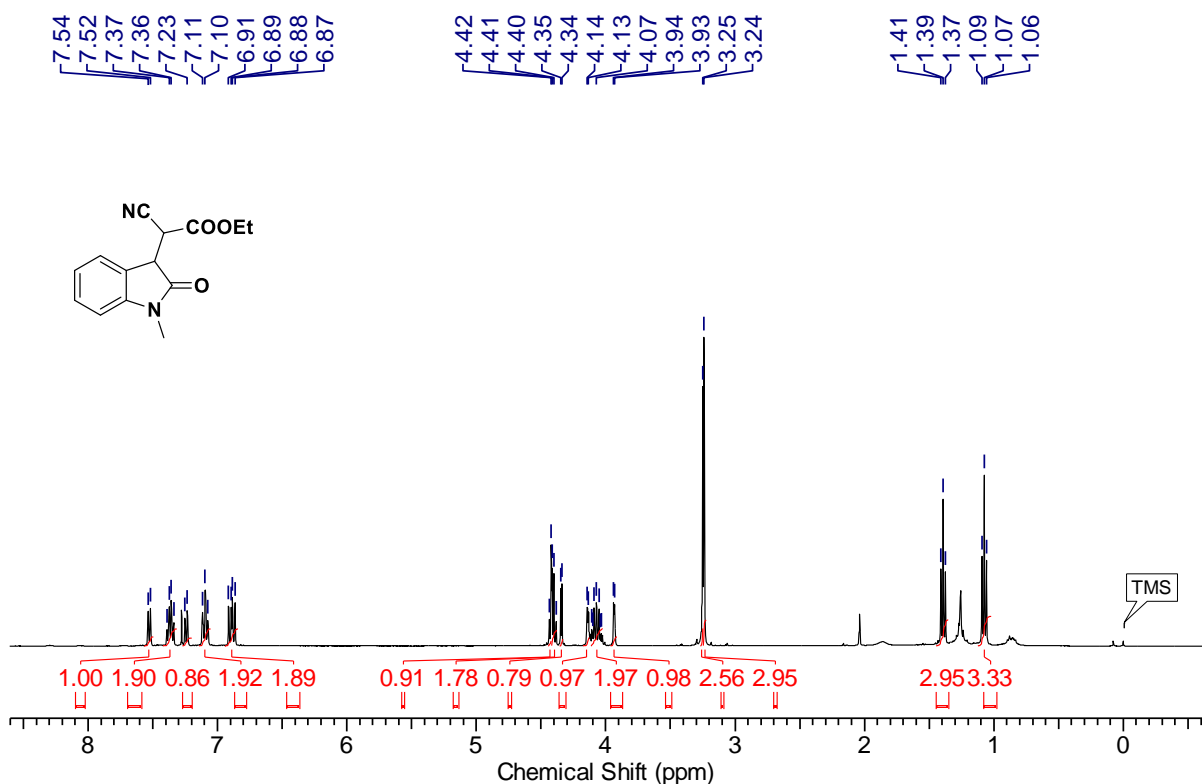

**<sup>13</sup>C NMR spectrum of compound 3Ap (101 MHz, CDCl<sub>3</sub>)**

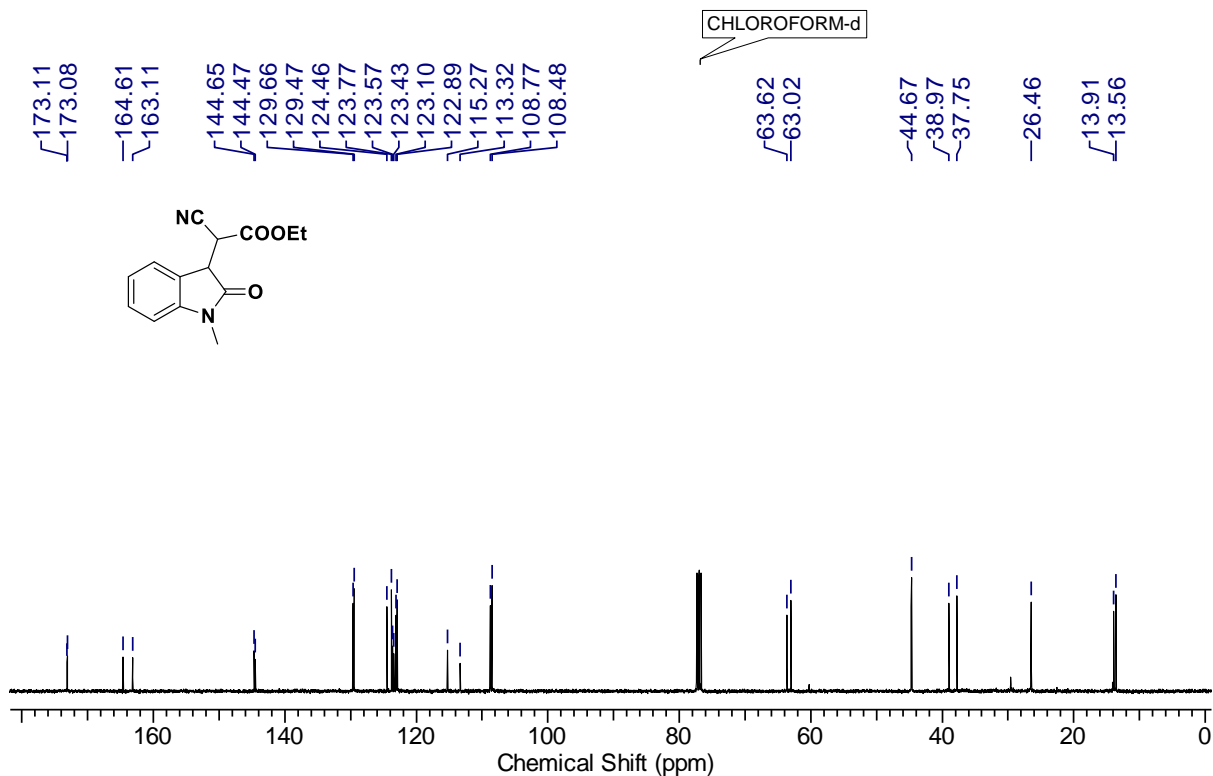

135 DEPT NMR spectrum of compound 3Ap

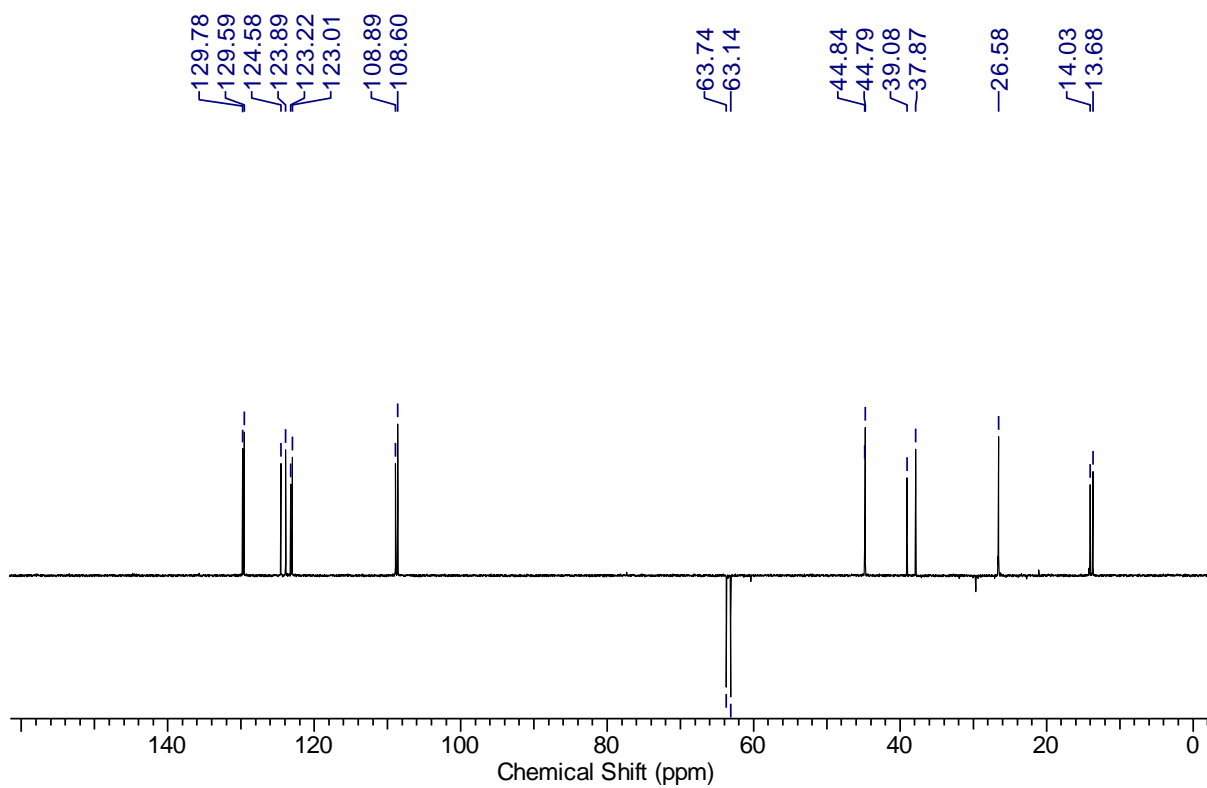

**<sup>1</sup>H NMR spectrum of compound 3Aq (400 MHz, CDCl<sub>3</sub>)**

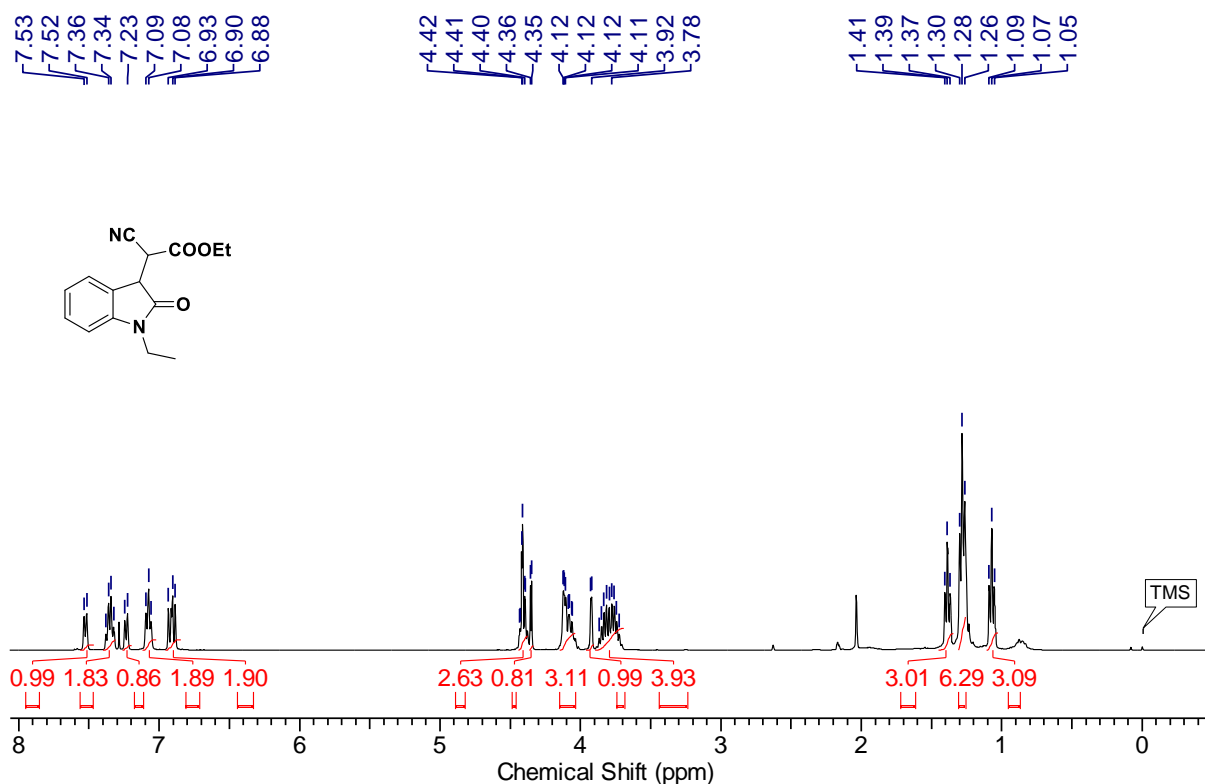

**<sup>13</sup>C NMR spectrum of compound 3Aq (101 MHz, CDCl<sub>3</sub>)**

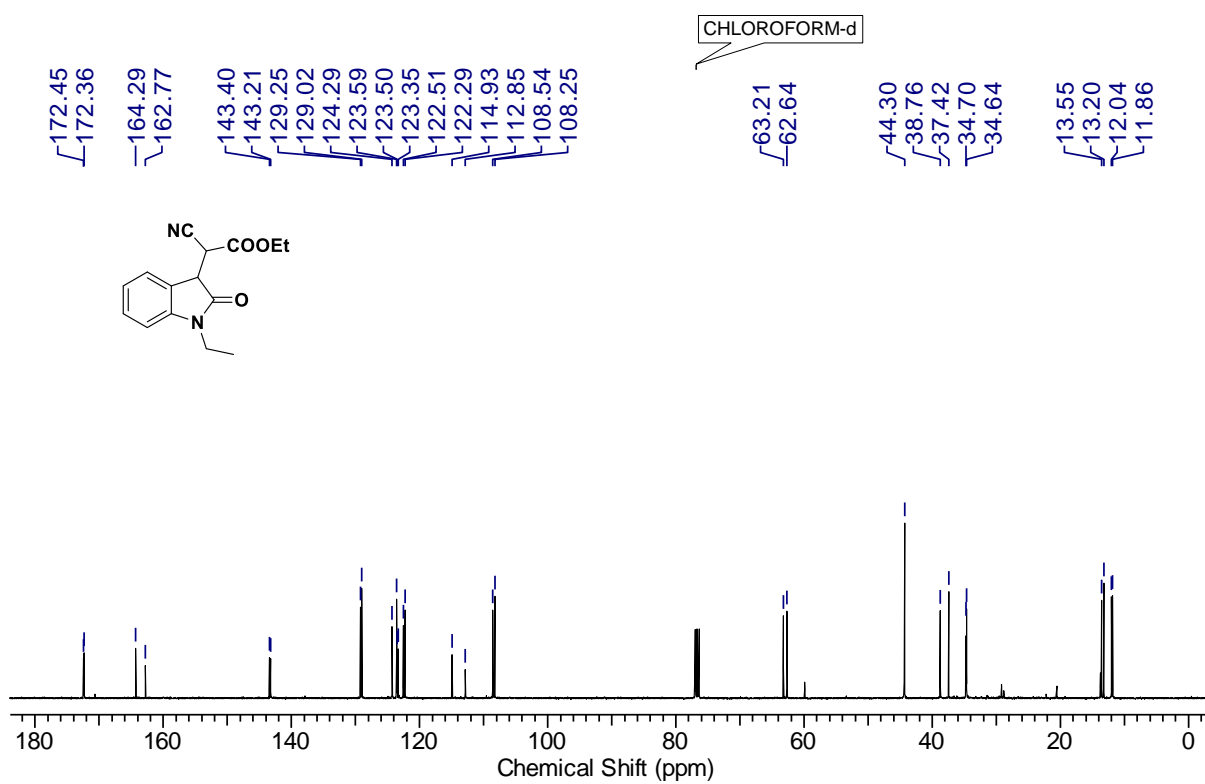

135 DEPT NMR spectrum of compound 3Aq

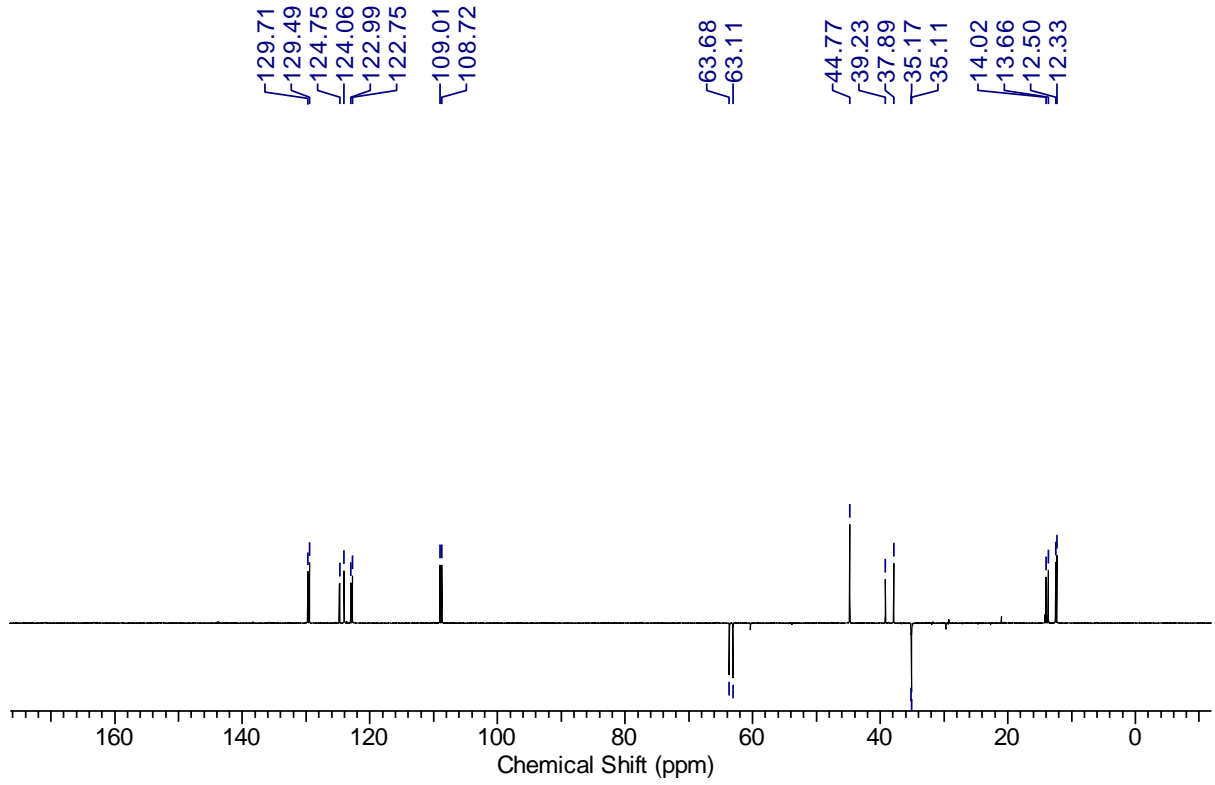

**<sup>1</sup>H NMR spectrum of compound 3Ar (400 MHz, CDCl<sub>3</sub>)**

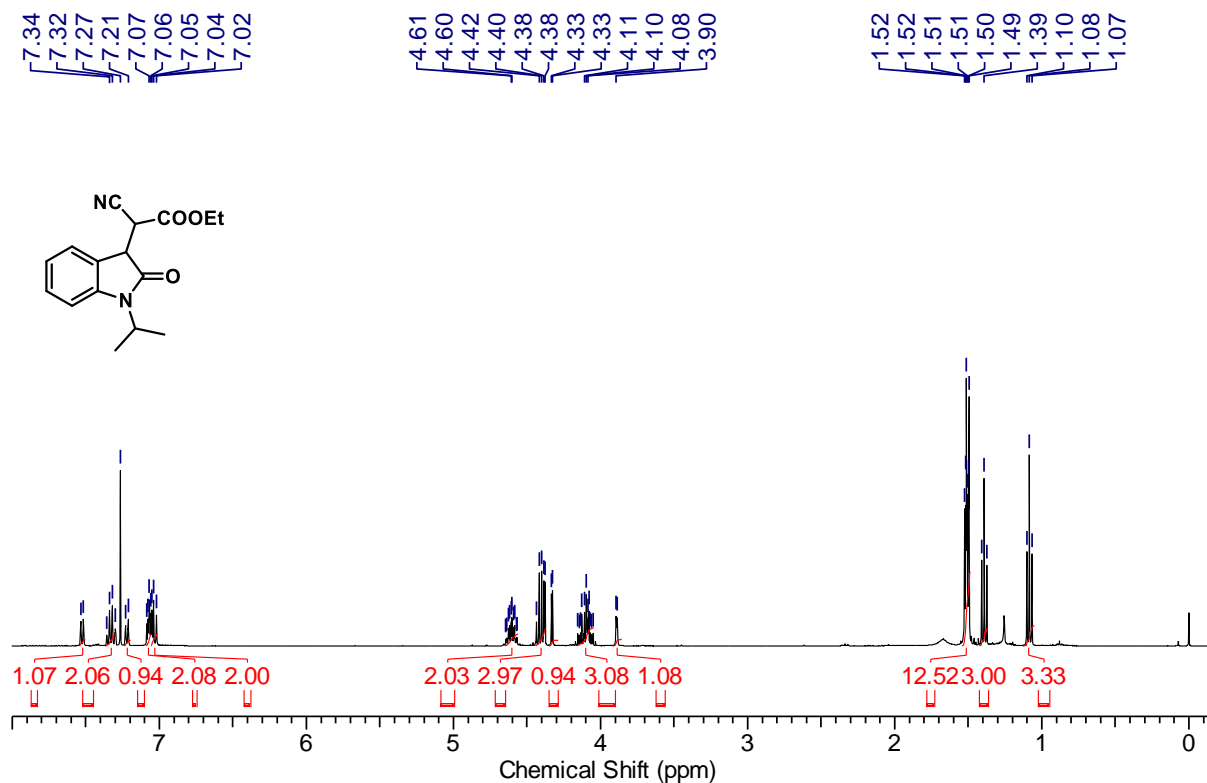

**<sup>13</sup>C NMR spectrum of compound 3Ar (101 MHz, CDCl<sub>3</sub>)**

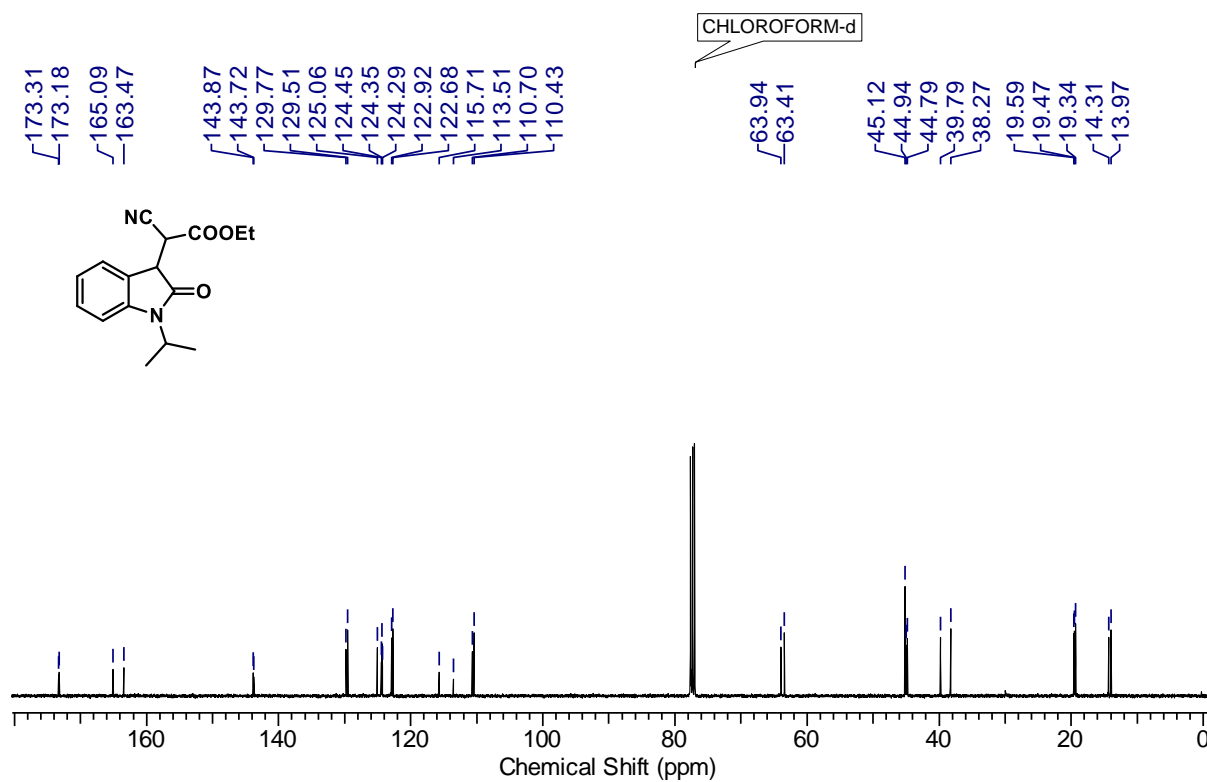

135 DEPT NMR spectrum of compound 3Ar

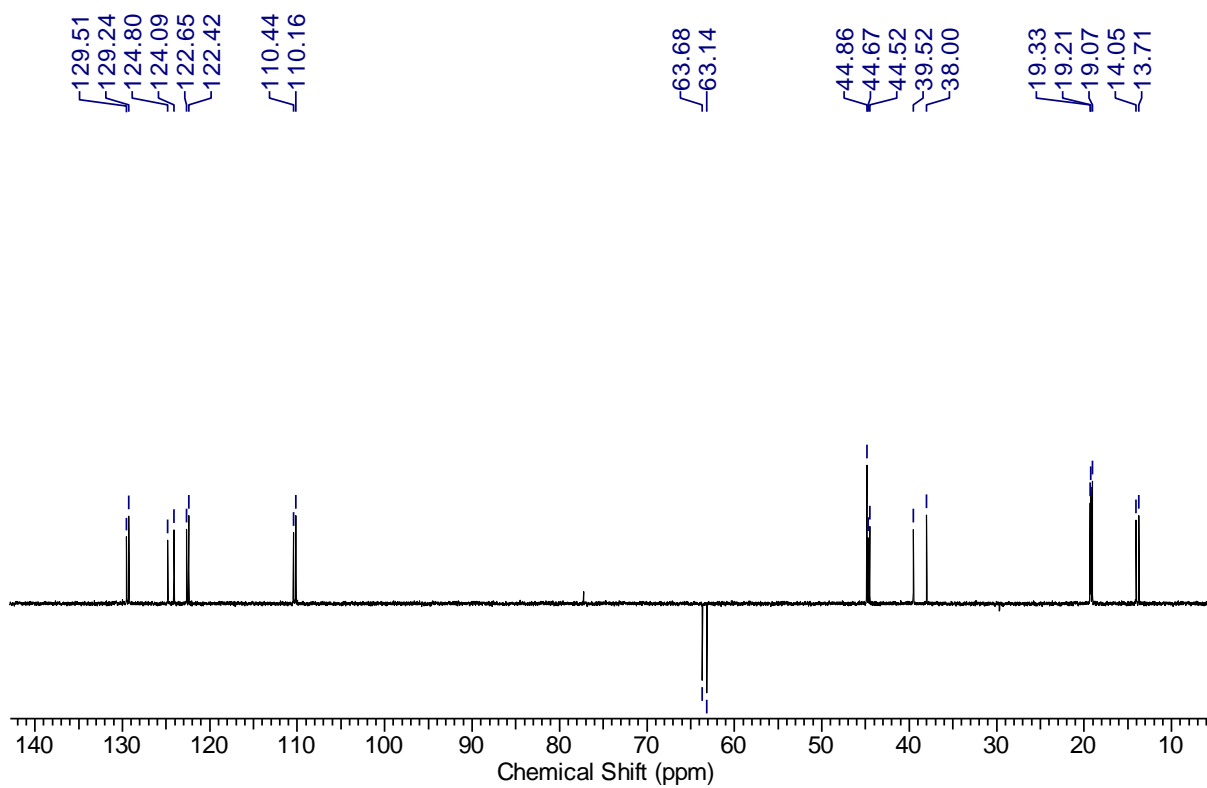

### <sup>1</sup>H NMR spectrum of compound 3As (400 MHz, CDCl<sub>3</sub>)

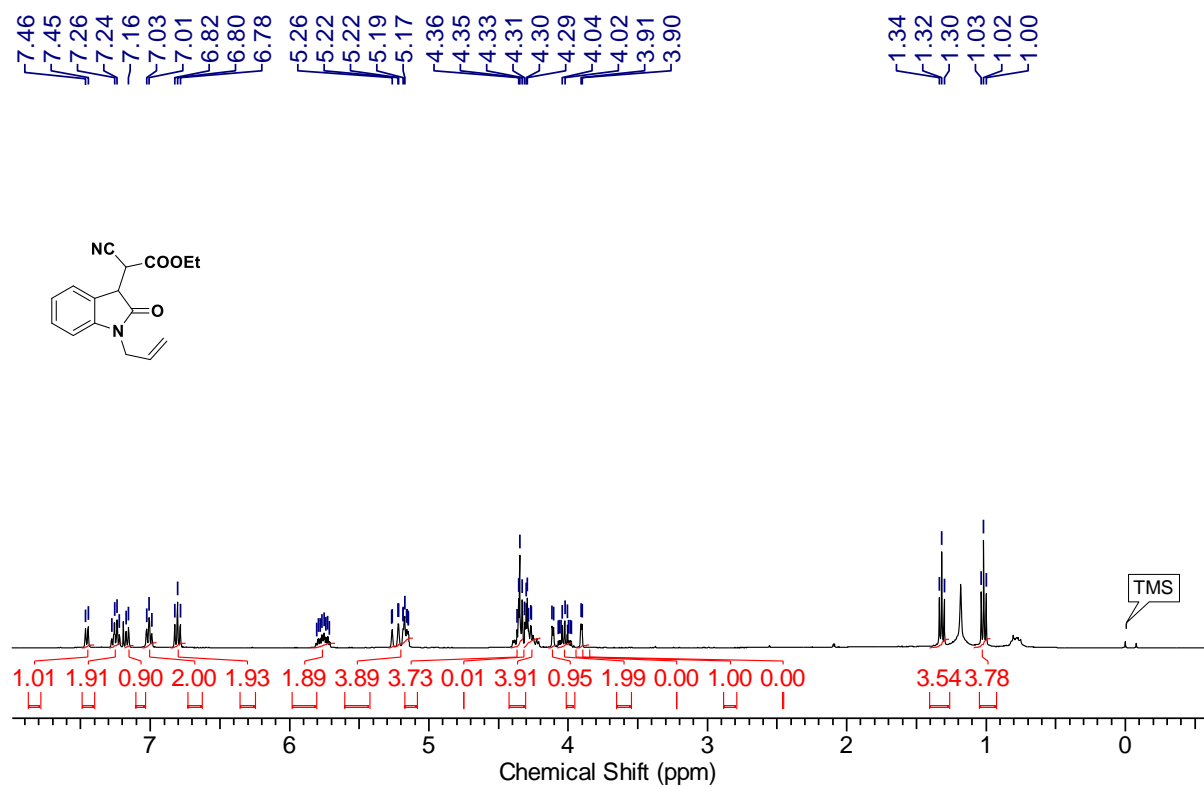

### <sup>13</sup>C NMR spectrum of compound 3As (101 MHz, CDCl<sub>3</sub>)

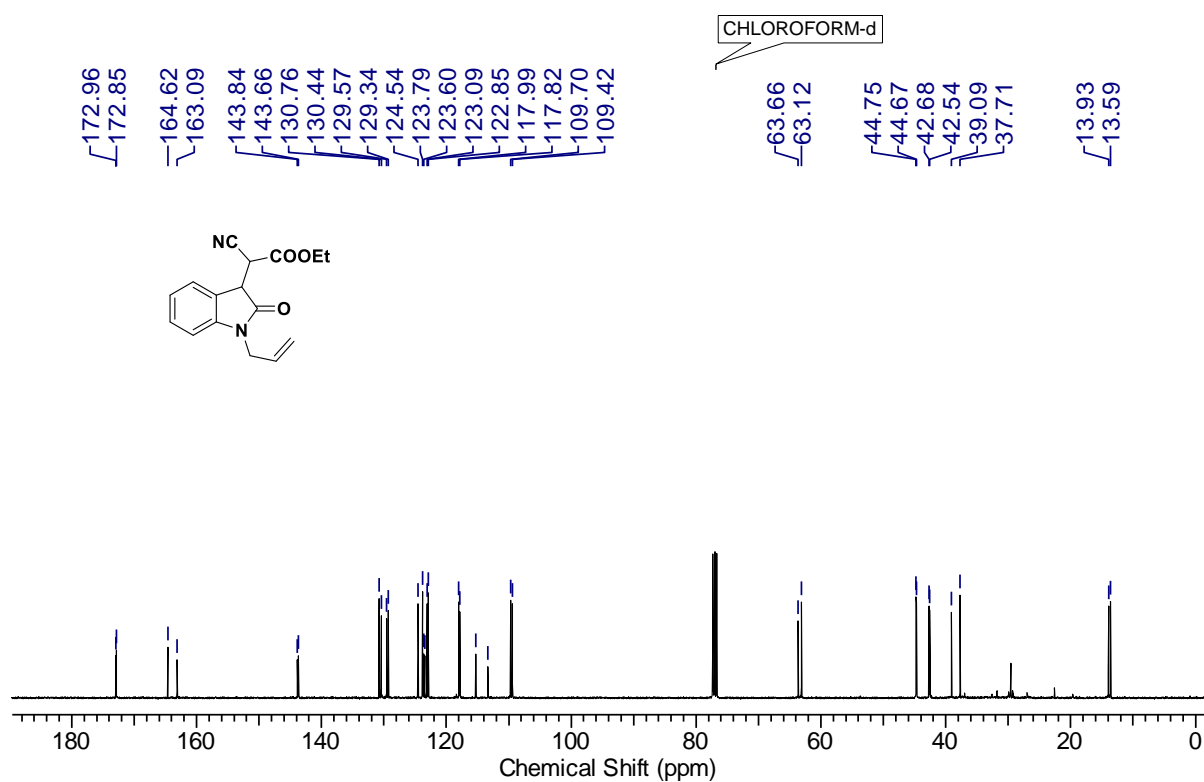

**135 DEPT NMR spectrum of compound 3As**

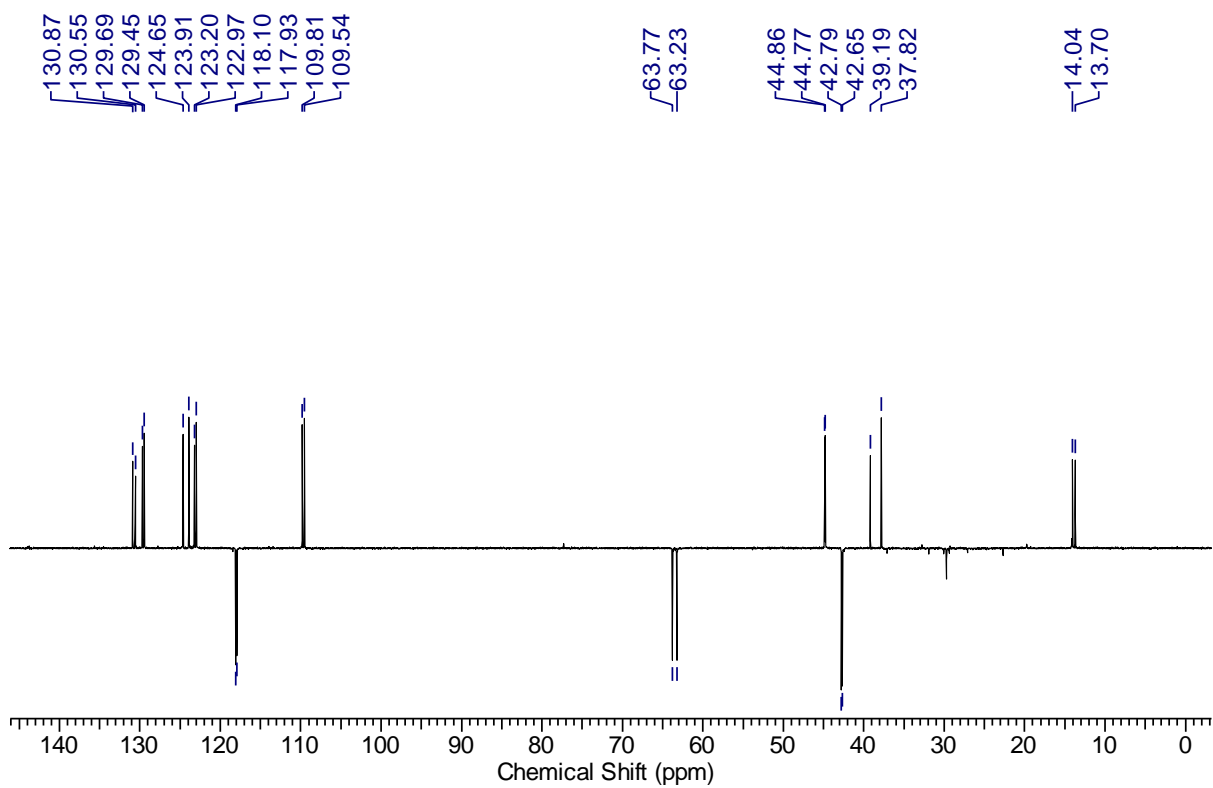

**<sup>1</sup>H NMR spectrum of compound 3At (400 MHz, CDCl<sub>3</sub>)**

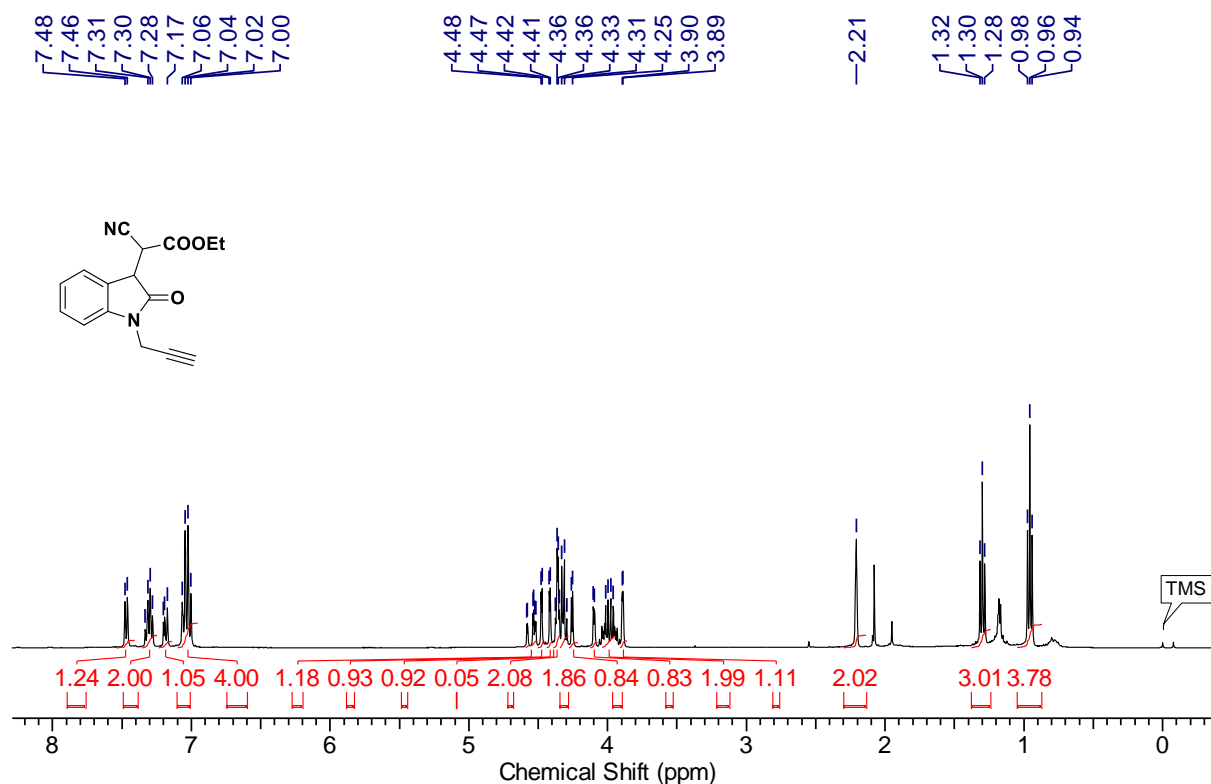

**<sup>13</sup>C NMR spectrum of compound 3At (101 MHz, CDCl<sub>3</sub>)**

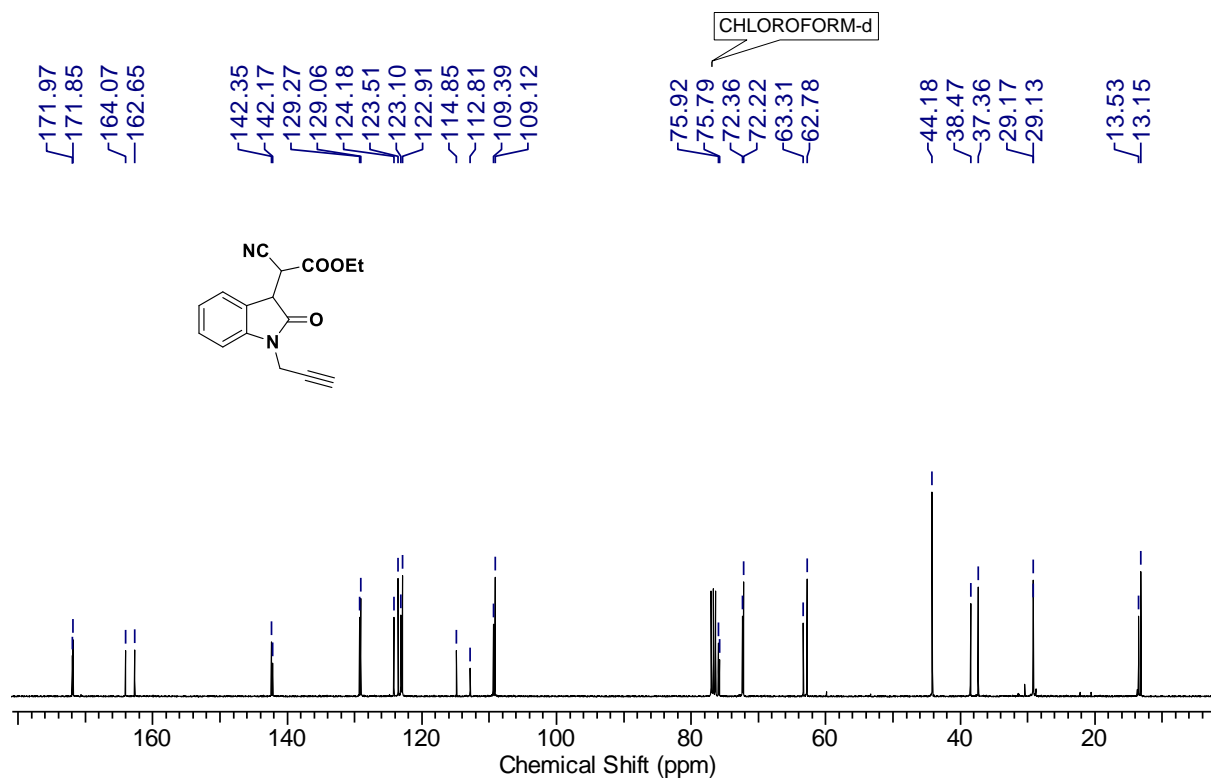

135 DEPT NMR spectrum of compound 3At

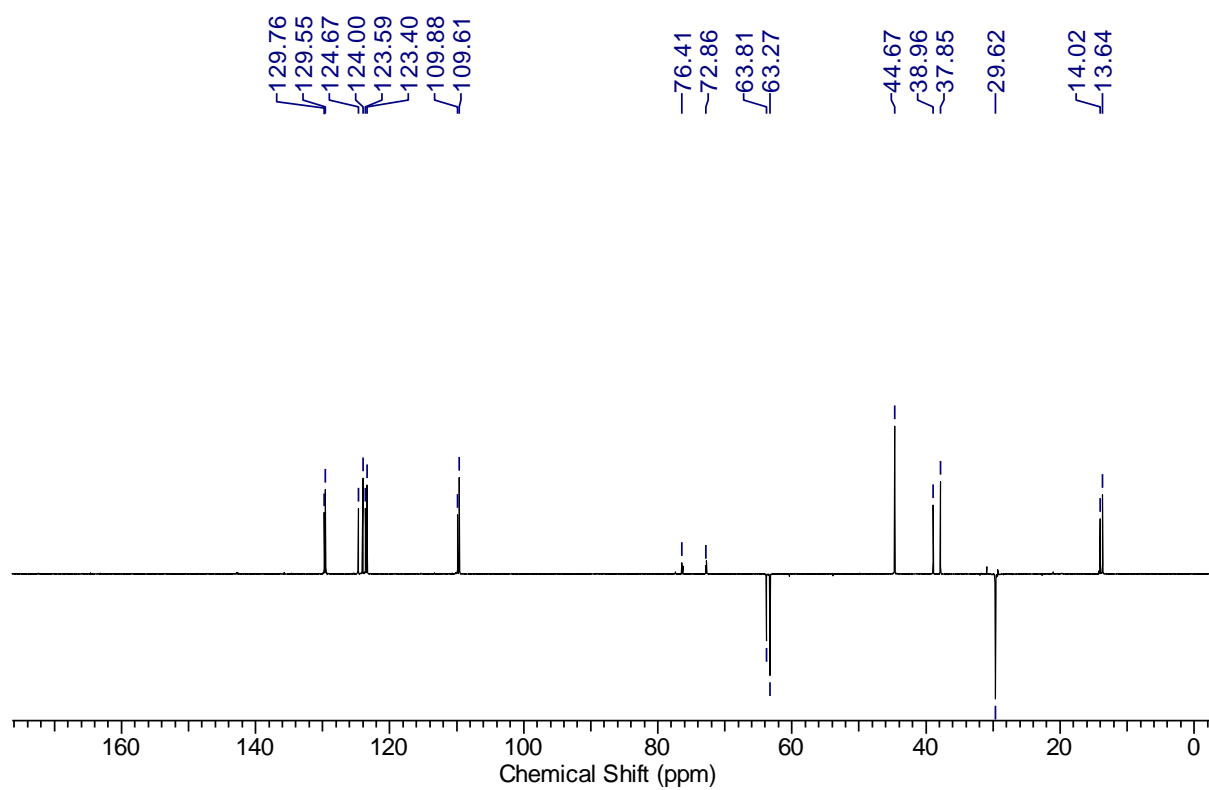

**<sup>1</sup>H NMR spectrum of compound 3Au (400 MHz, CDCl<sub>3</sub>)**

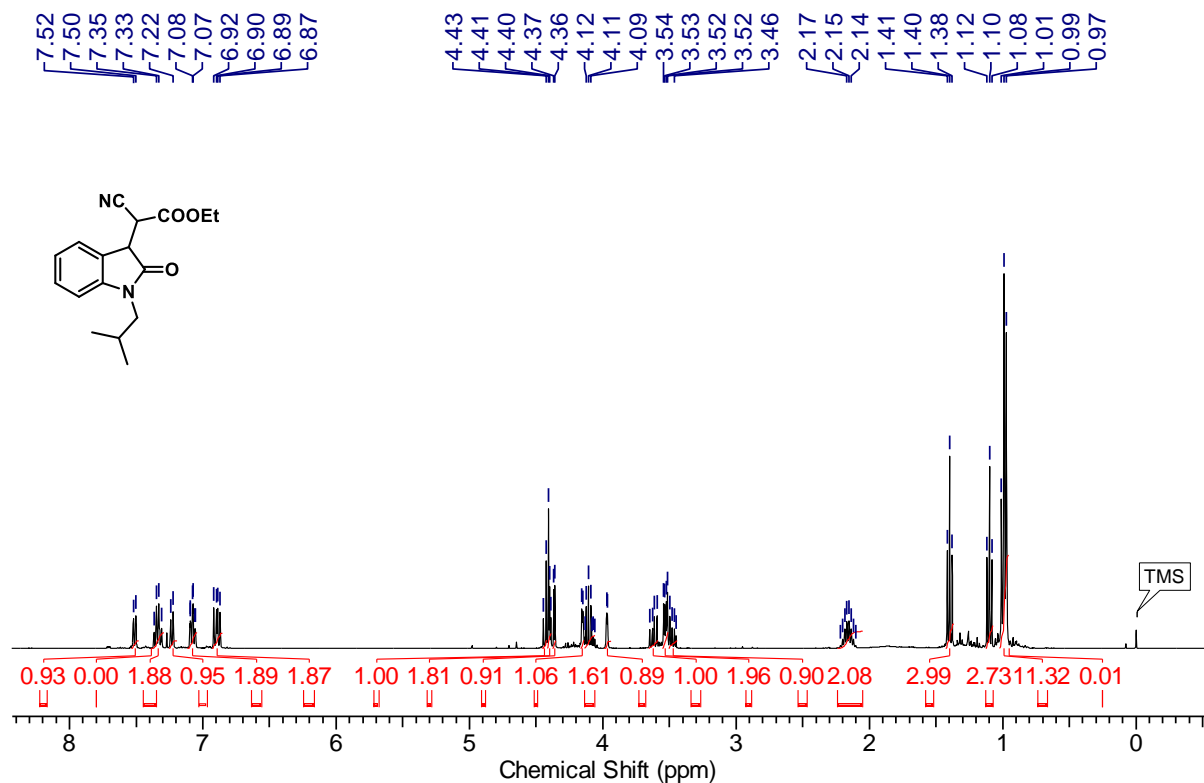

**<sup>13</sup>C NMR spectrum of compound 3Au (101 MHz, CDCl<sub>3</sub>)**

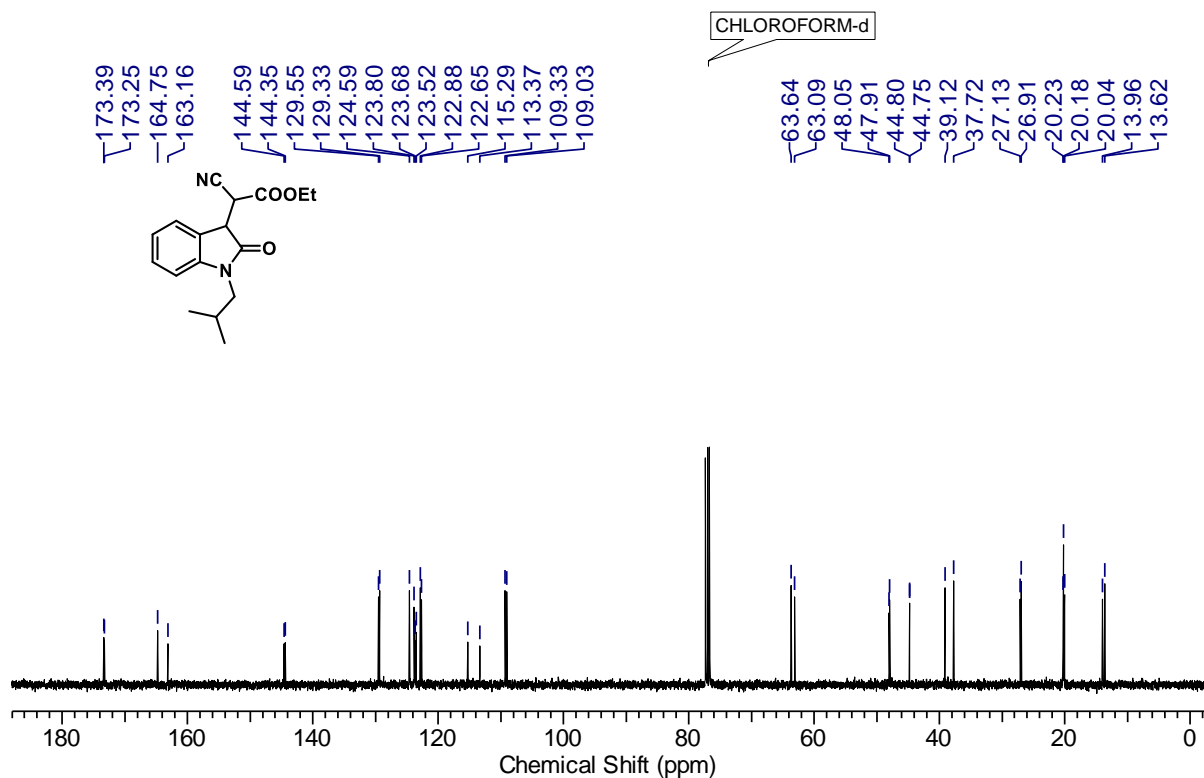

135 DEPT NMR spectrum of compound 3Au

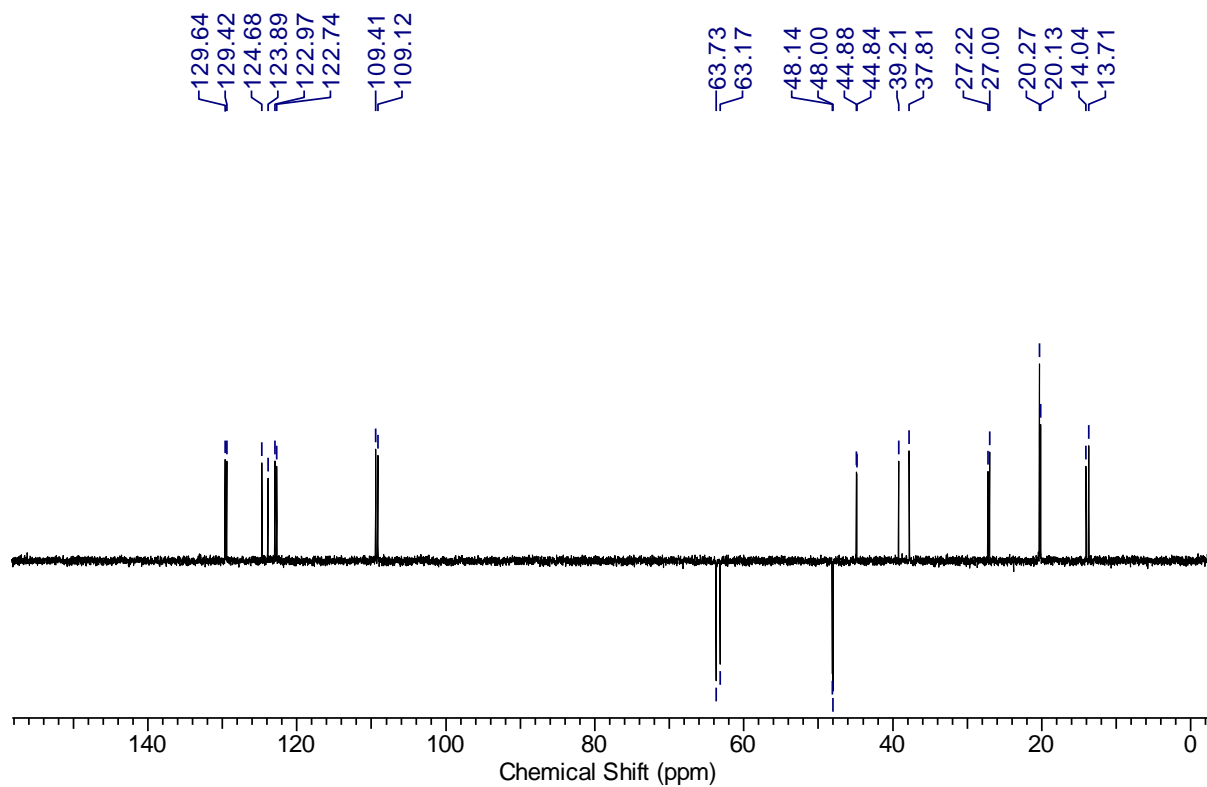

**<sup>1</sup>H NMR spectrum of compound 3Av (400 MHz, CDCl<sub>3</sub>)**

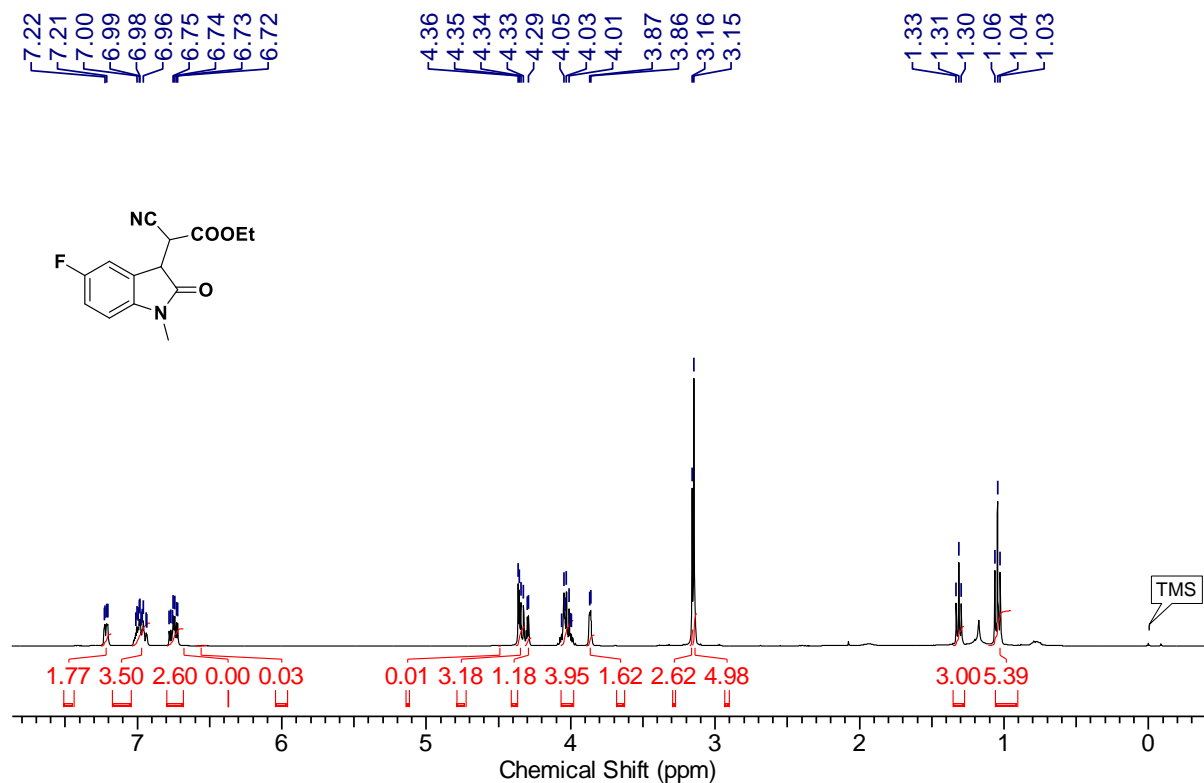

**<sup>13</sup>C NMR spectrum of compound 3Av (101 MHz, CDCl<sub>3</sub>)**

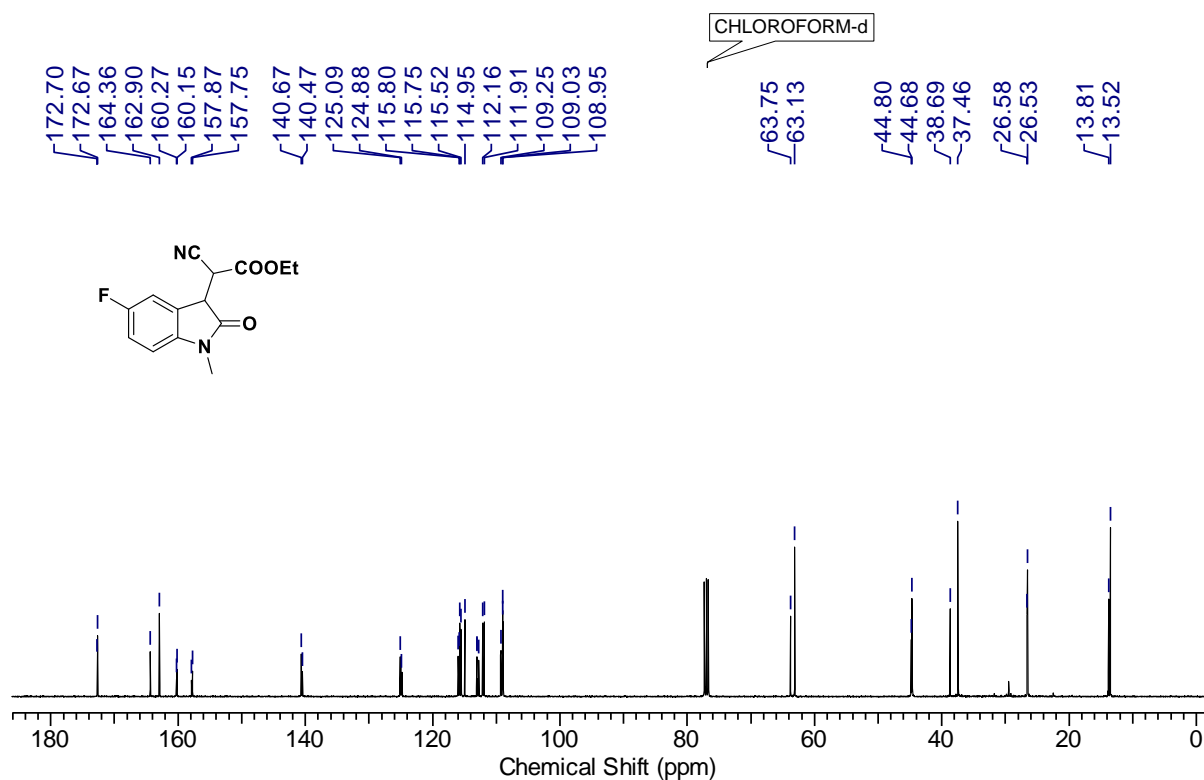

**<sup>13</sup>C DEPT NMR spectrum of compound 3Av**

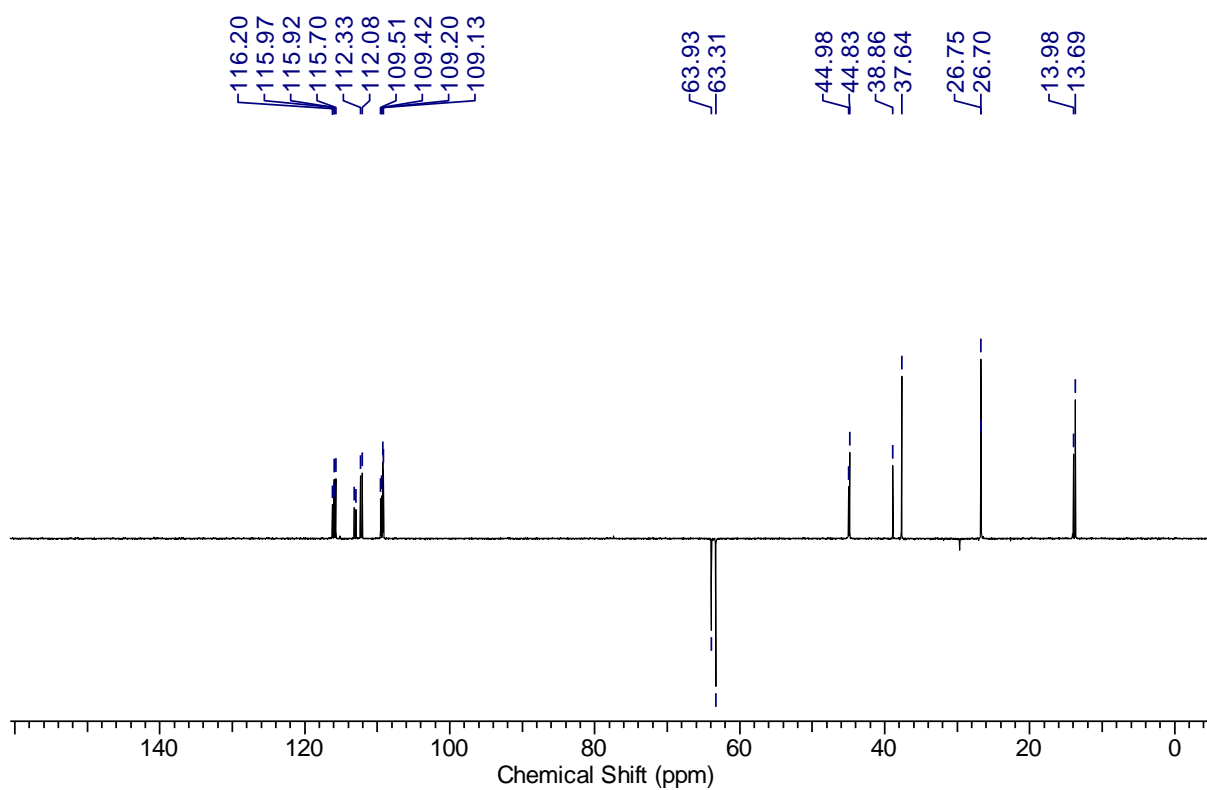

**<sup>19</sup>F spectrum of compound 3Av**

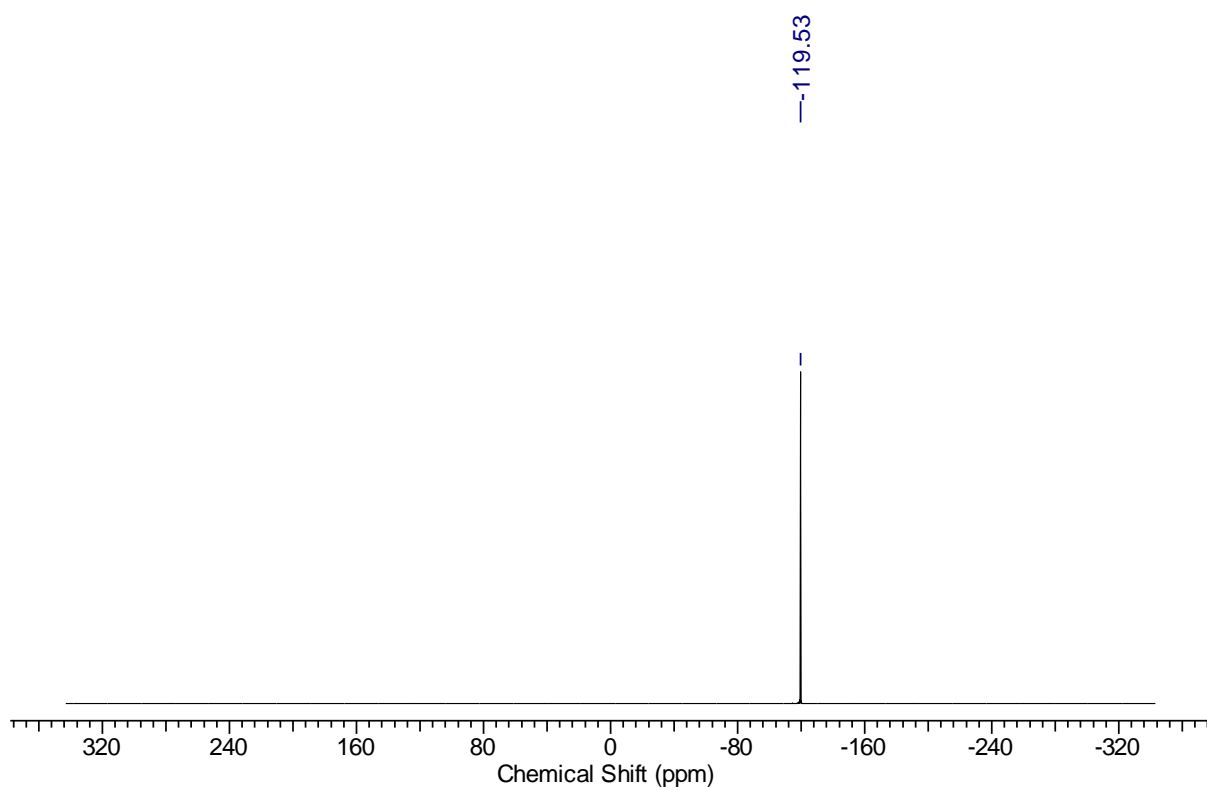

**<sup>1</sup>H NMR spectrum of compound 3Aw (400 MHz, CDCl<sub>3</sub>)**

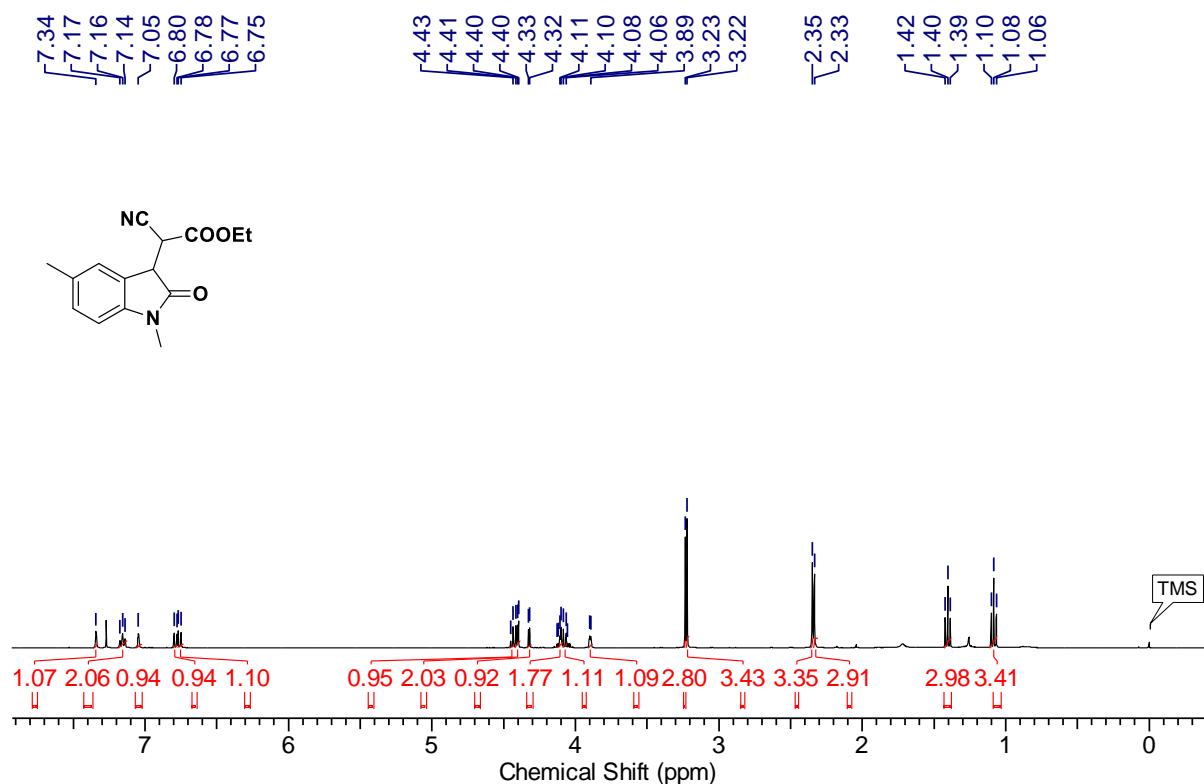

**<sup>13</sup>C NMR spectrum of compound 3Aw (101 MHz, CDCl<sub>3</sub>)**

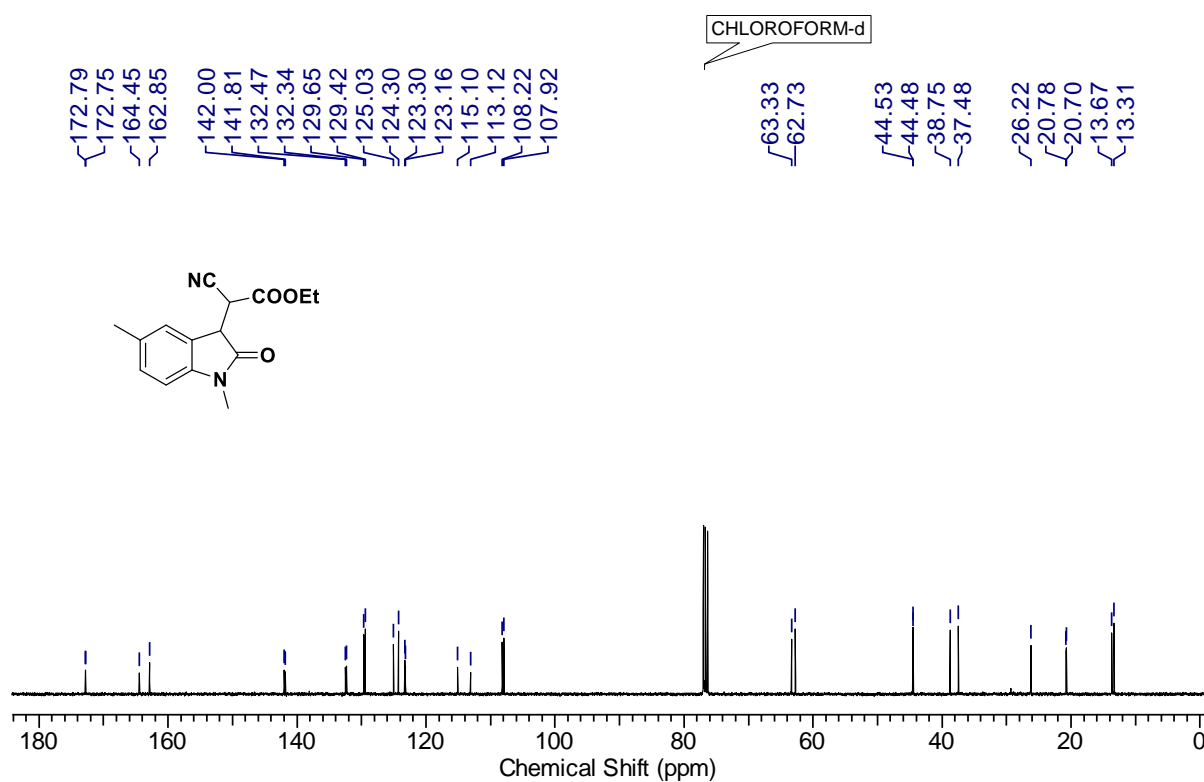

135 DEPT NMR spectrum of compound 3Aw

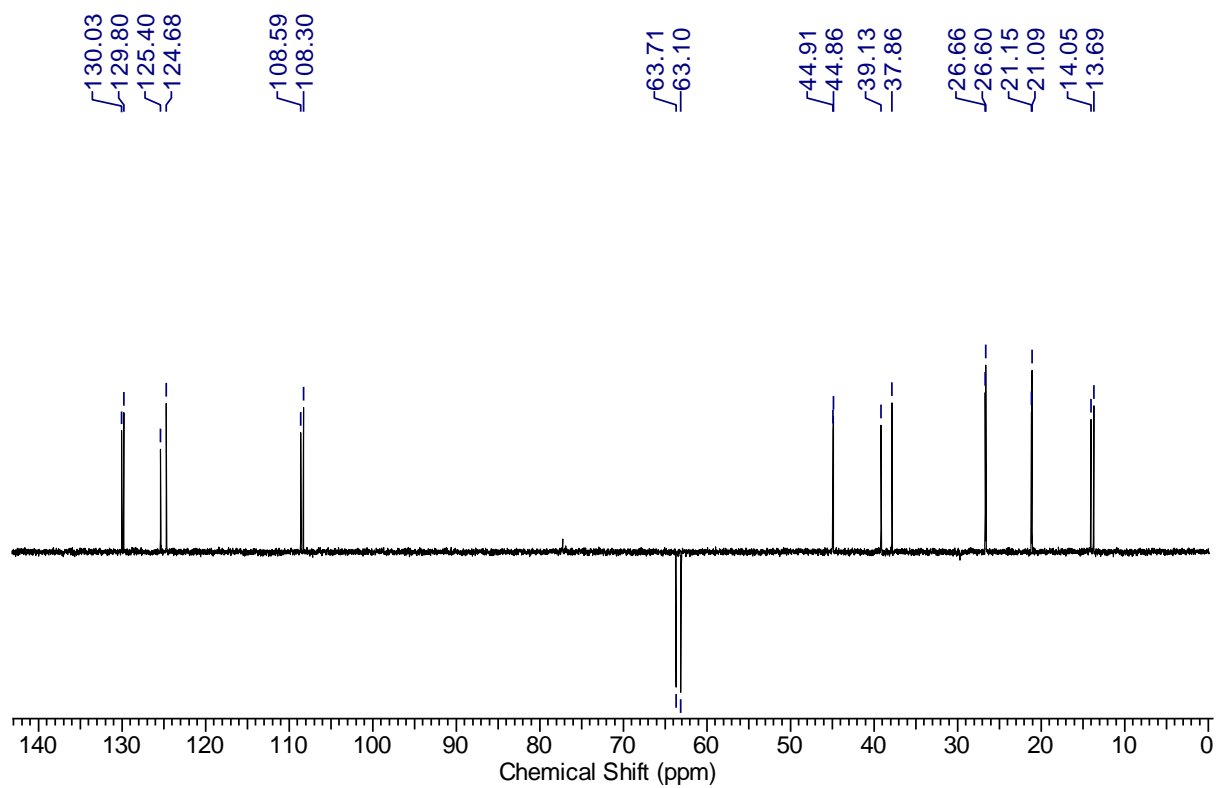

**<sup>1</sup>H NMR spectrum of compound 3Ax (400 MHz, CDCl<sub>3</sub>)**

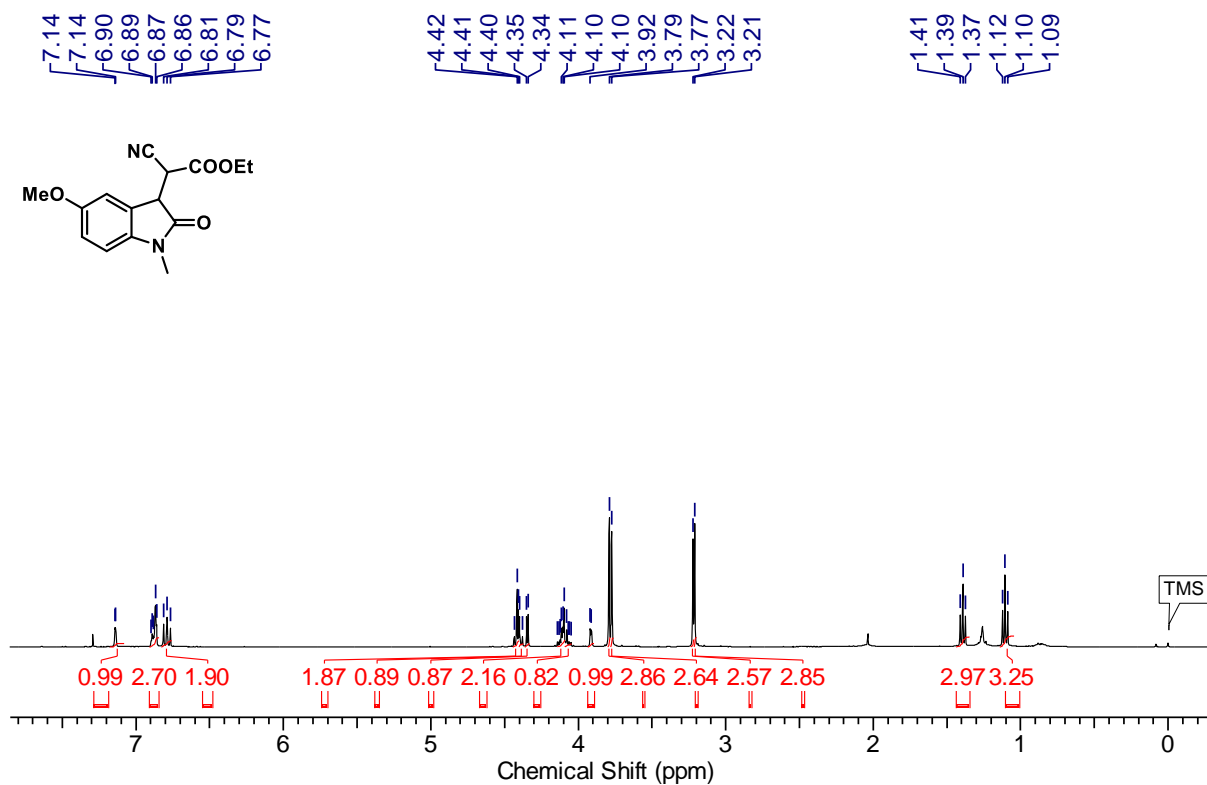

**<sup>13</sup>C NMR spectrum of compound 3Ax (101 MHz, CDCl<sub>3</sub>)**

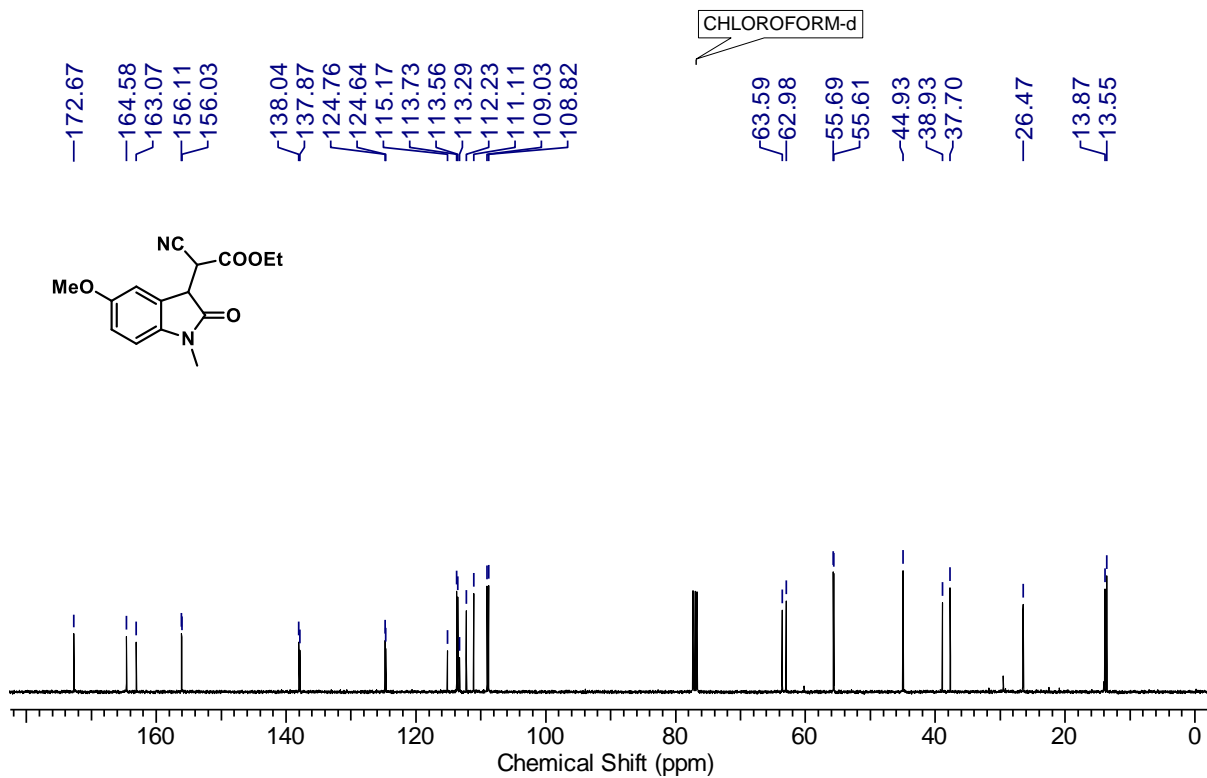

135 DEPT NMR spectrum of compound 3Ax

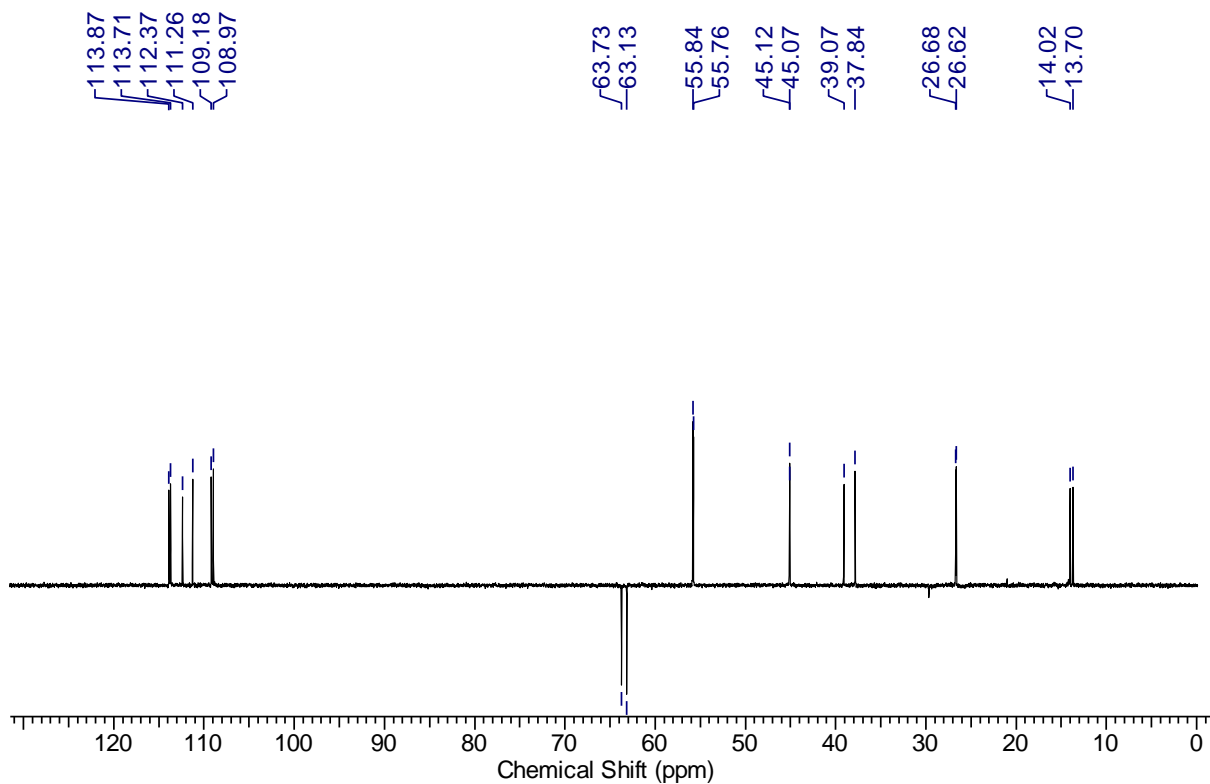

**<sup>1</sup>H NMR spectrum of compound 3Ay (400 MHz, CDCl<sub>3</sub>)**

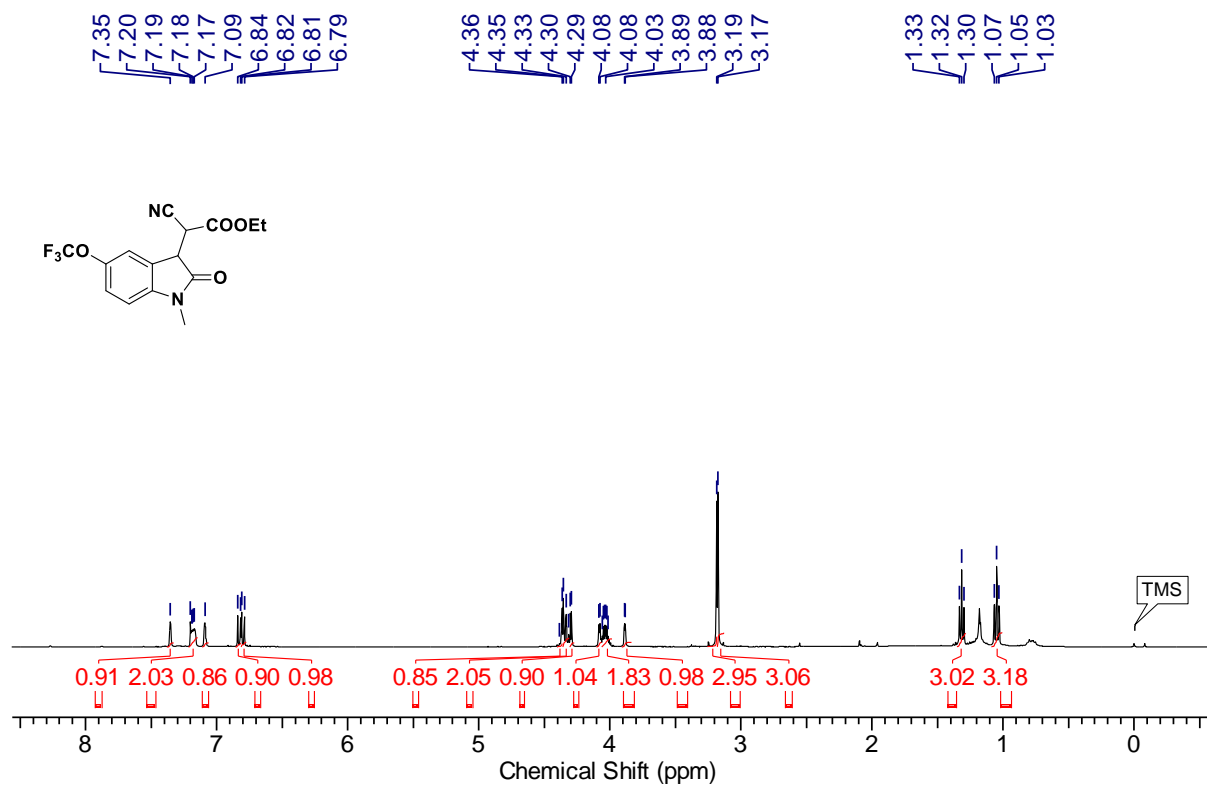

**<sup>13</sup>C NMR spectrum of compound 3Ay (101 MHz, CDCl<sub>3</sub>)**

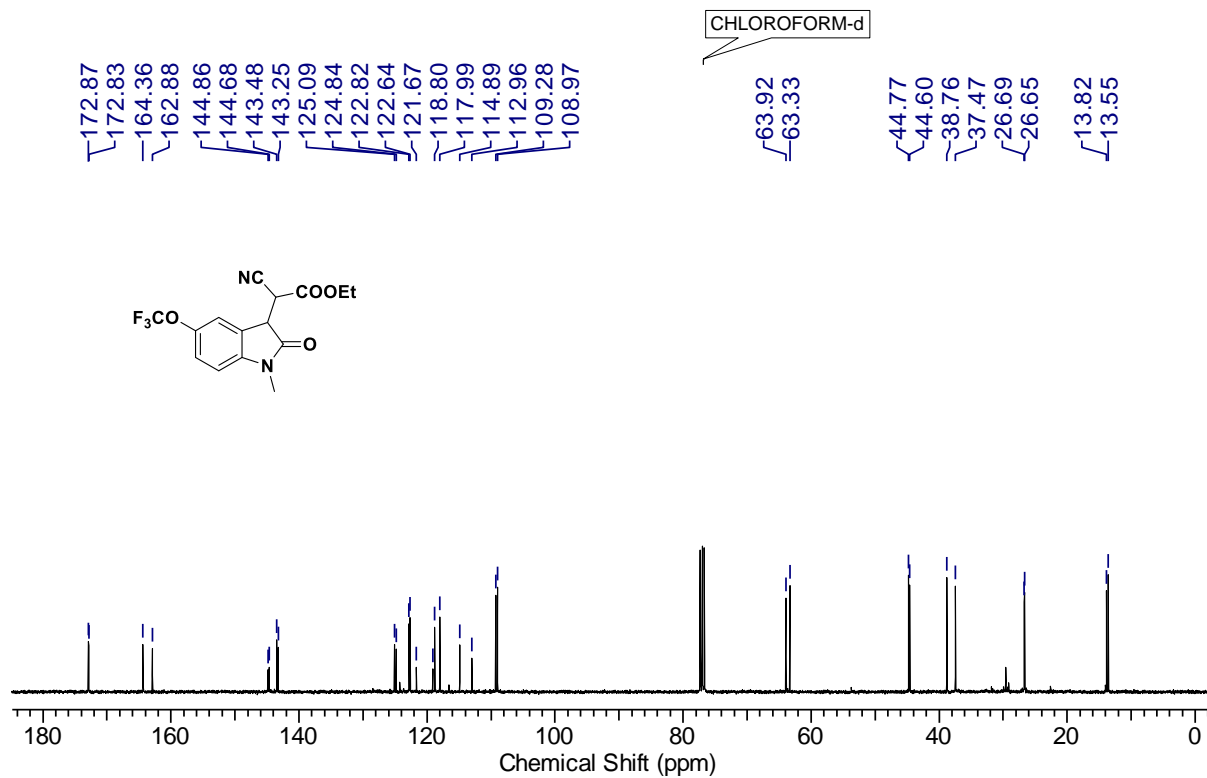

### 135 DEPT NMR spectrum of compound 3Ay

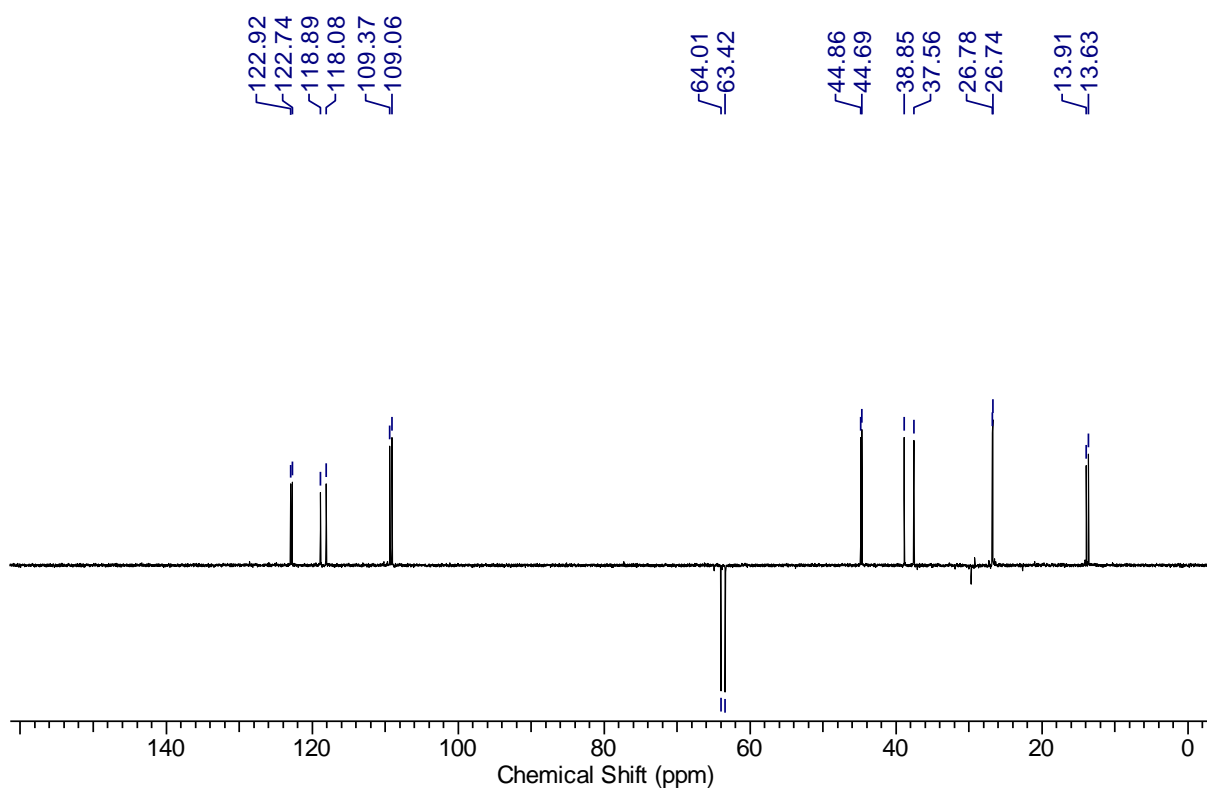

### <sup>19</sup>F spectrum of compound 3Ay

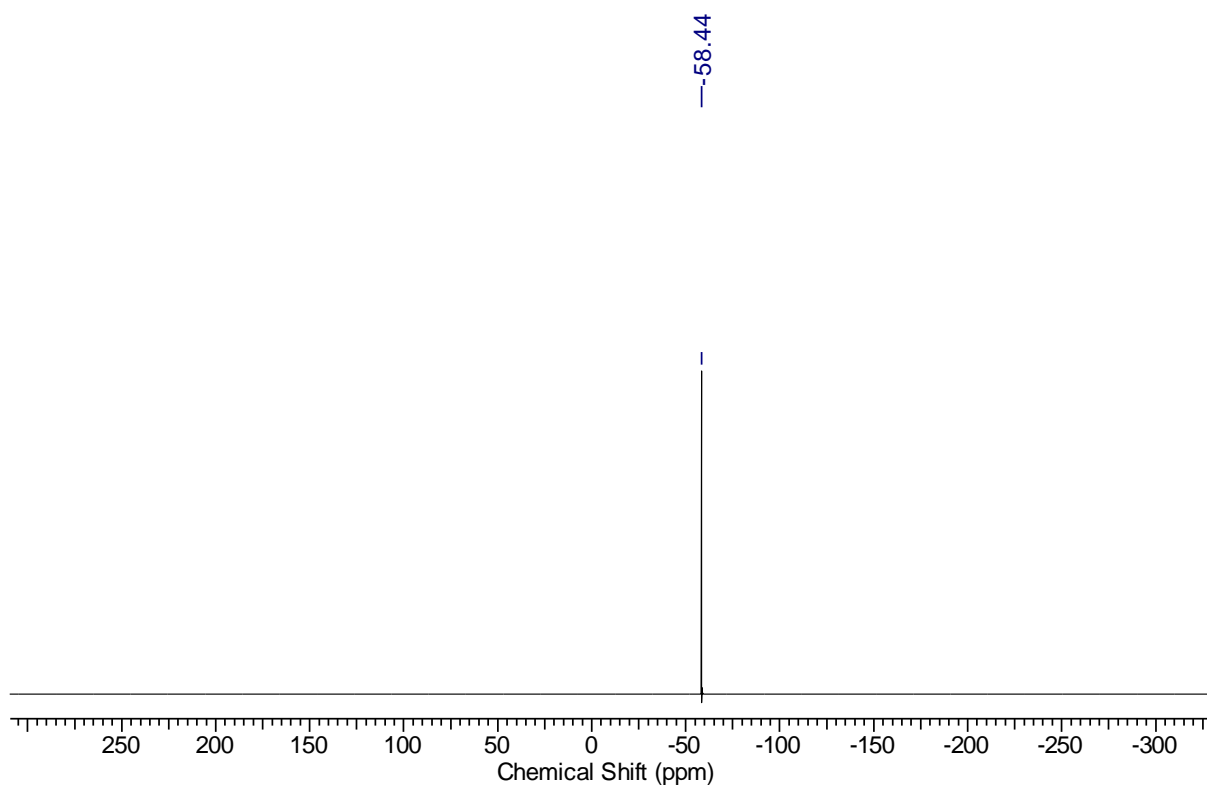

**<sup>1</sup>H NMR spectrum of compound 3B (400 MHz, DMSO-d<sup>6</sup>)**

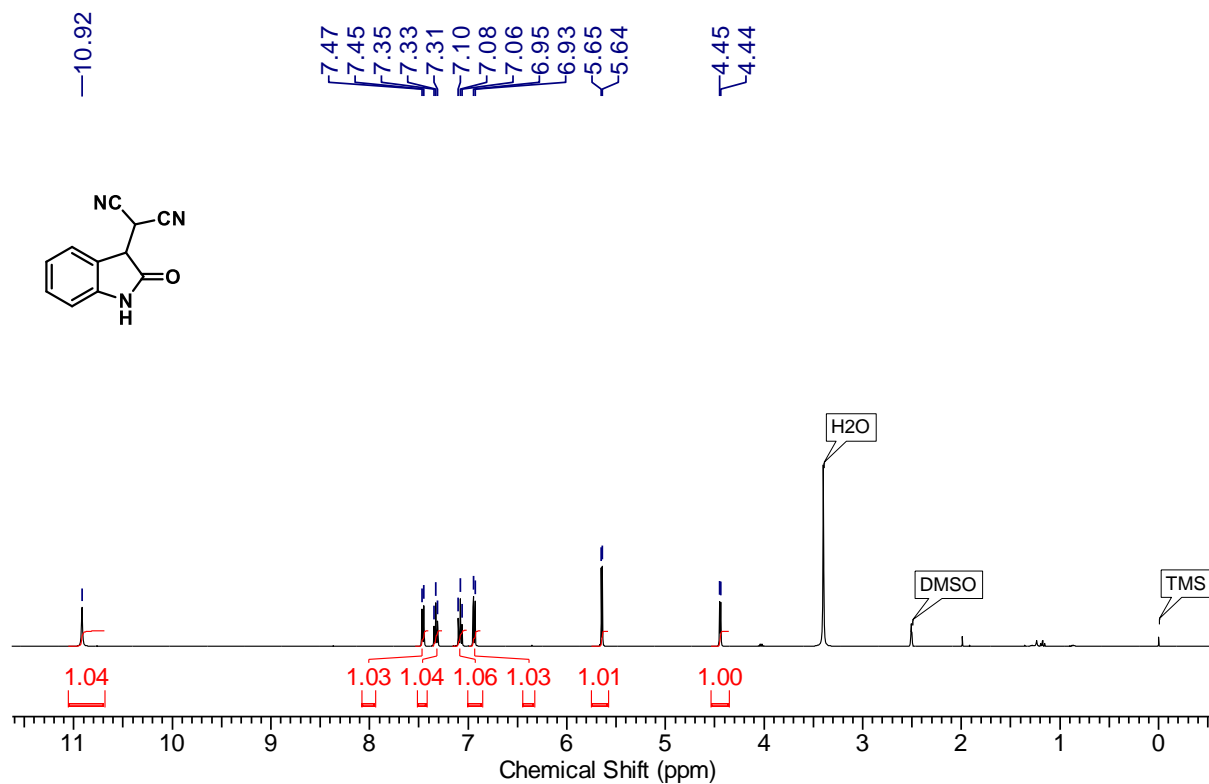

**<sup>13</sup>C NMR spectrum of compound 3B (101 MHz, DMSO-d<sup>6</sup>)**

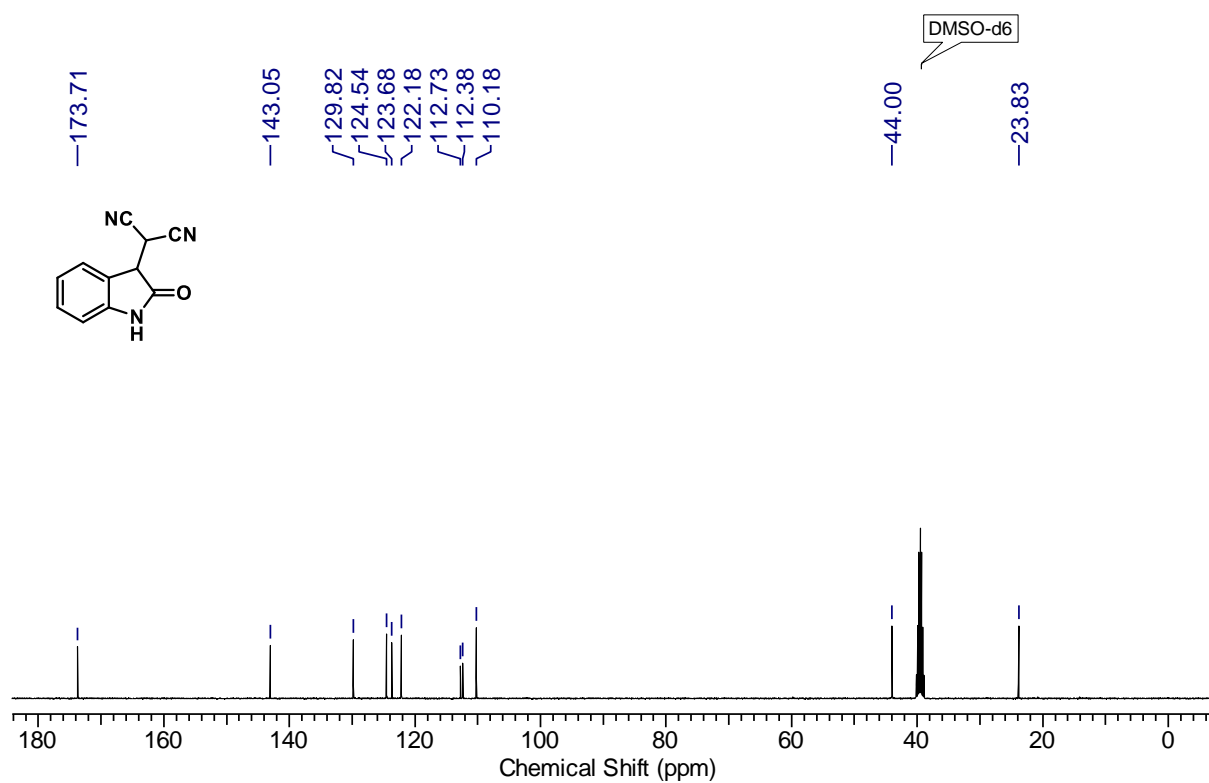

**135 DEPT NMR spectrum of compound 3B**

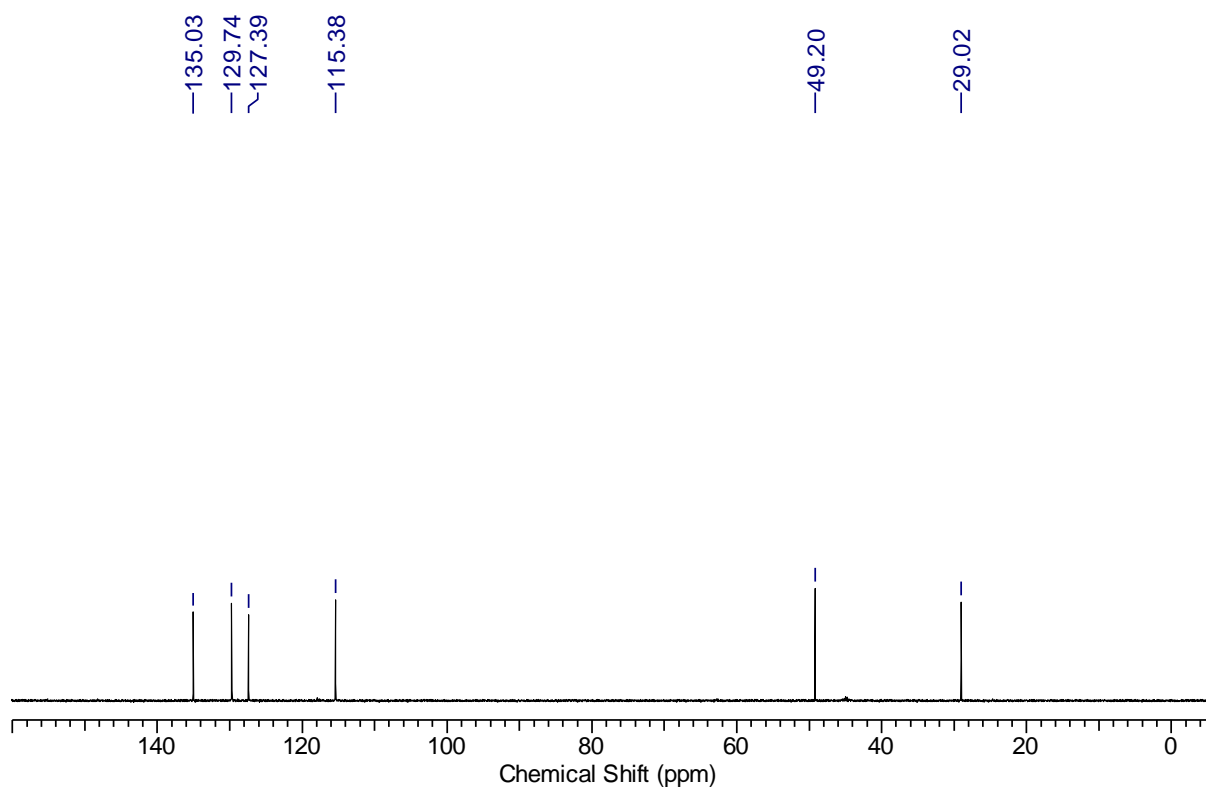

**<sup>1</sup>H NMR spectrum of compound 3Ba (400 MHz, DMSO-d<sup>6</sup>)**

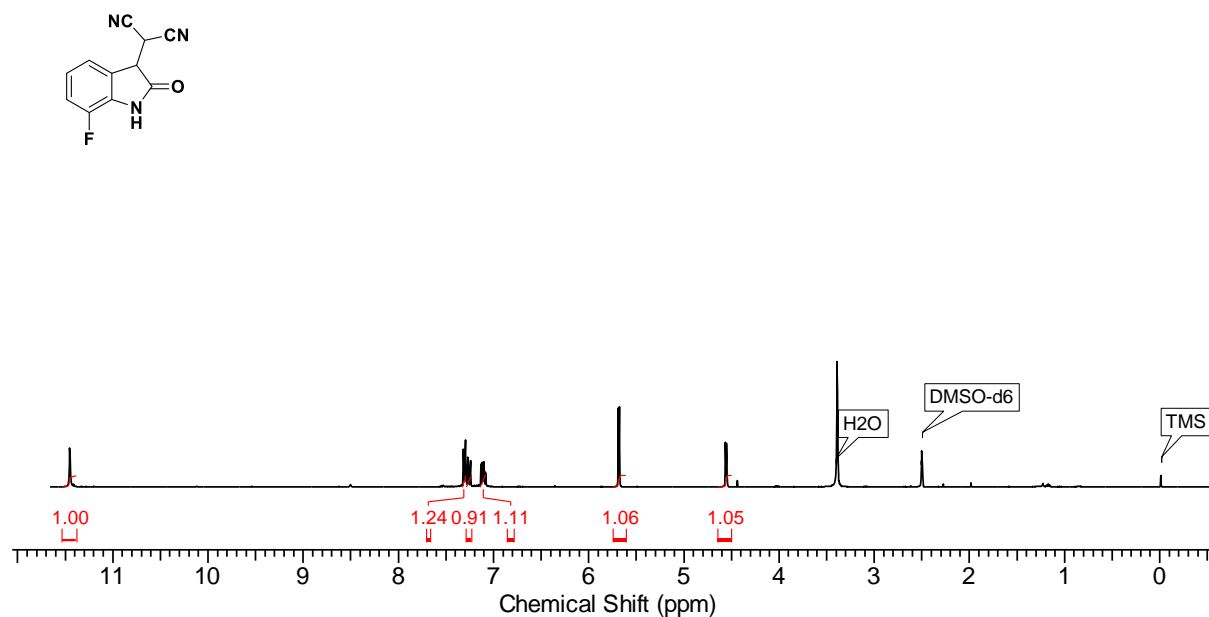

**<sup>13</sup>C NMR spectrum of compound 3Ba (101 MHz, DMSO-d<sup>6</sup>)**

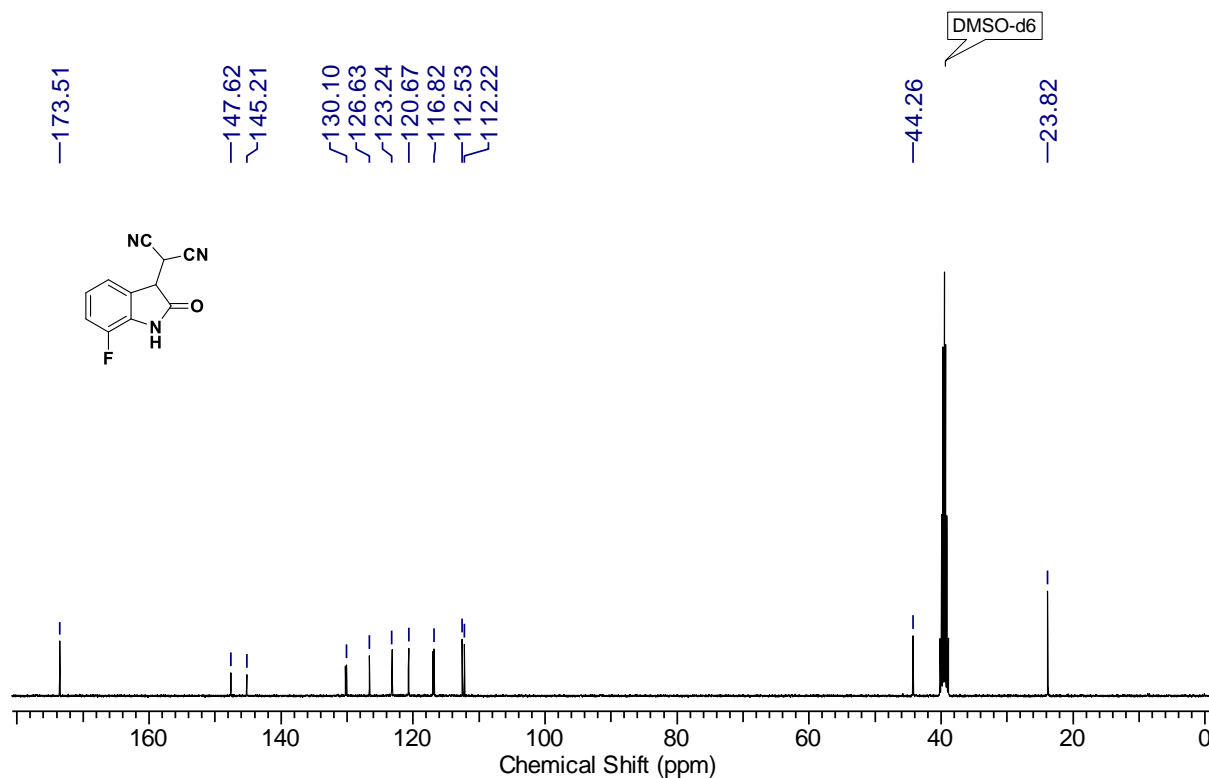

**135 DEPT NMR spectrum of compound 3Ba**

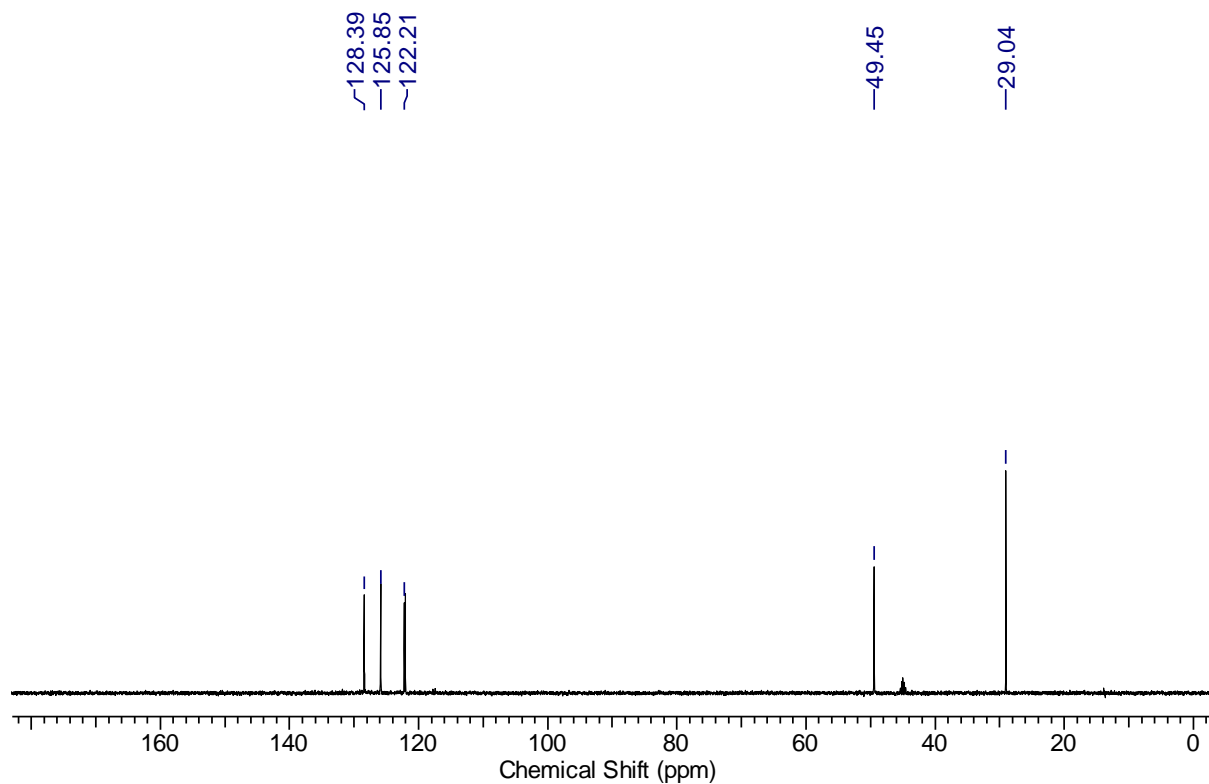

**<sup>19</sup>F spectrum of compound 3Ba**

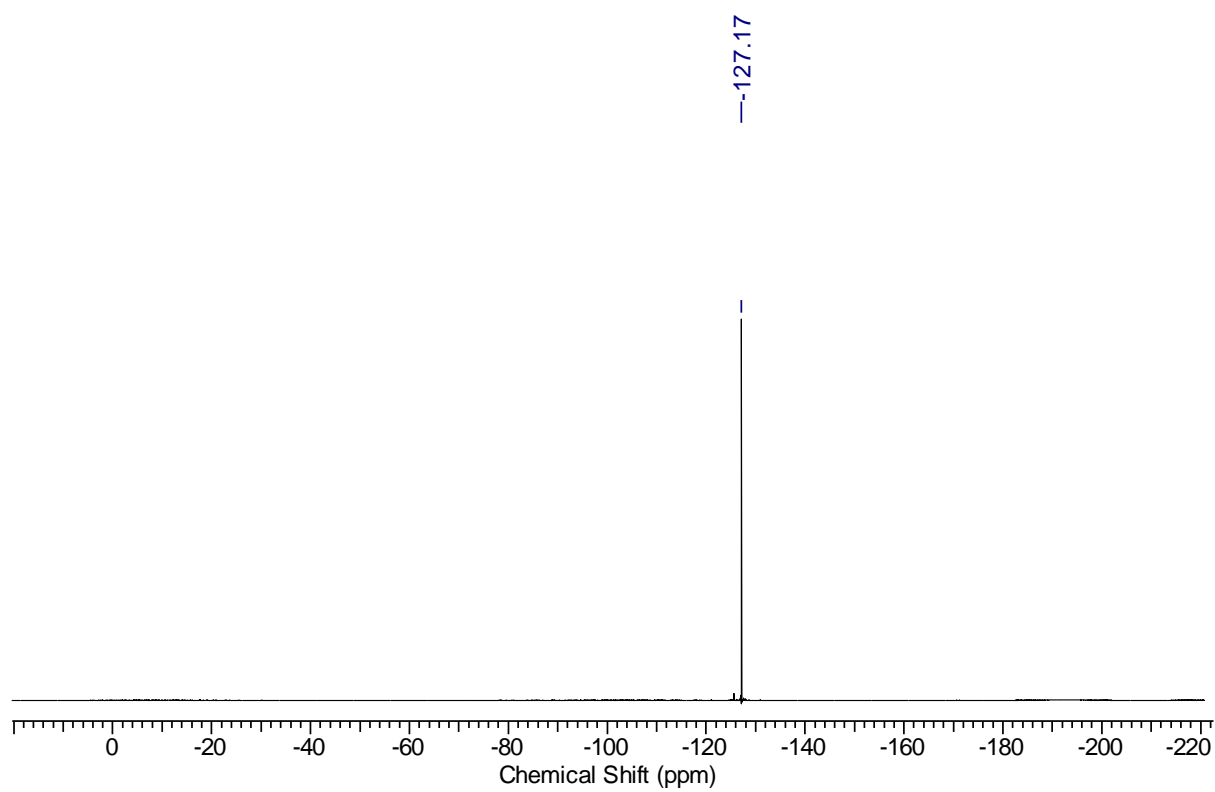

**<sup>1</sup>H NMR spectrum of compound 3Bb (400 MHz, CDCl<sub>3</sub>)**

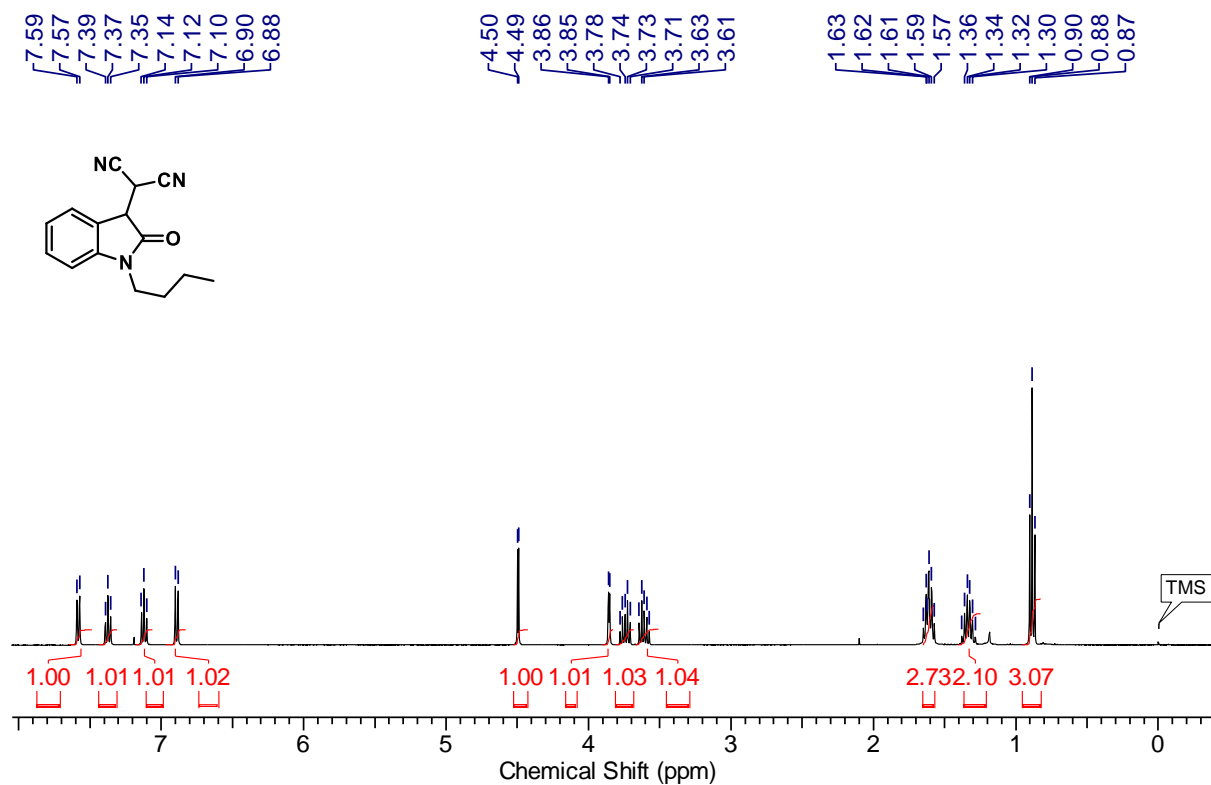

**<sup>13</sup>C NMR spectrum of compound 3Bb (101 MHz, CDCl<sub>3</sub>)**

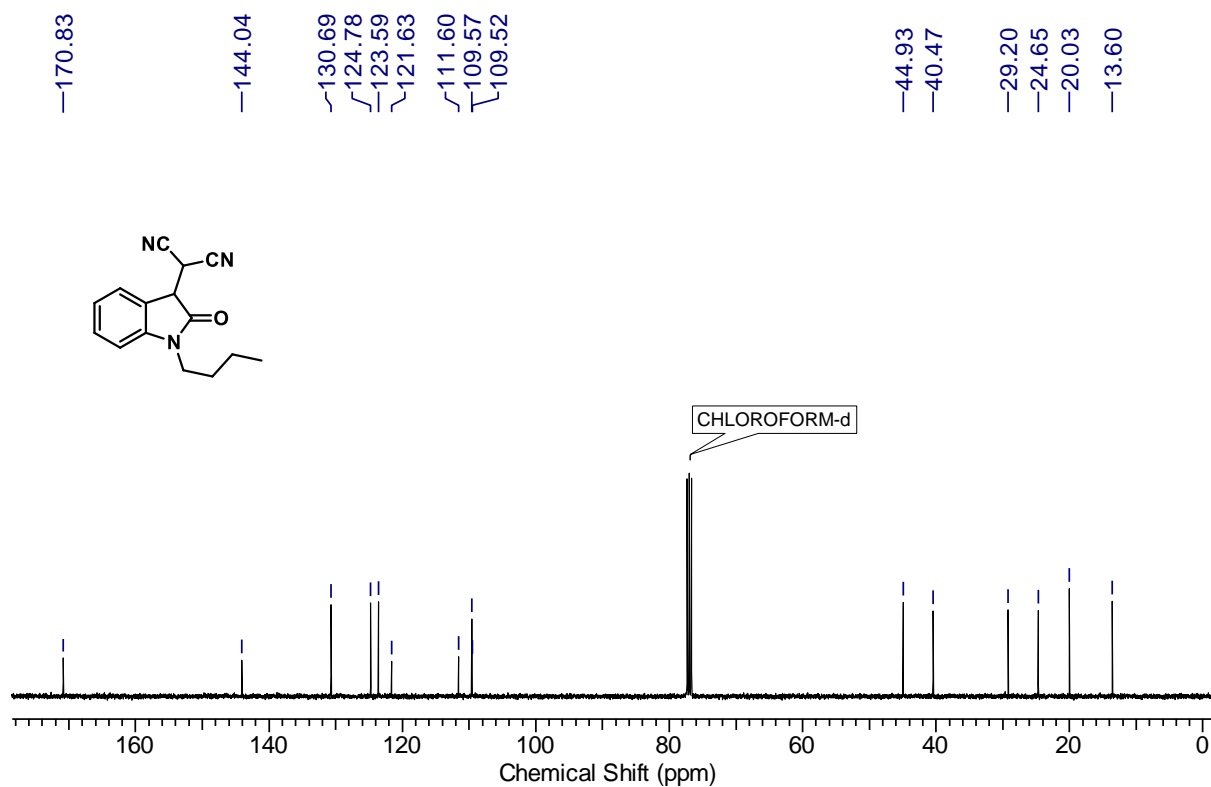

**135 DEPT NMR spectrum of compound 3Bb**

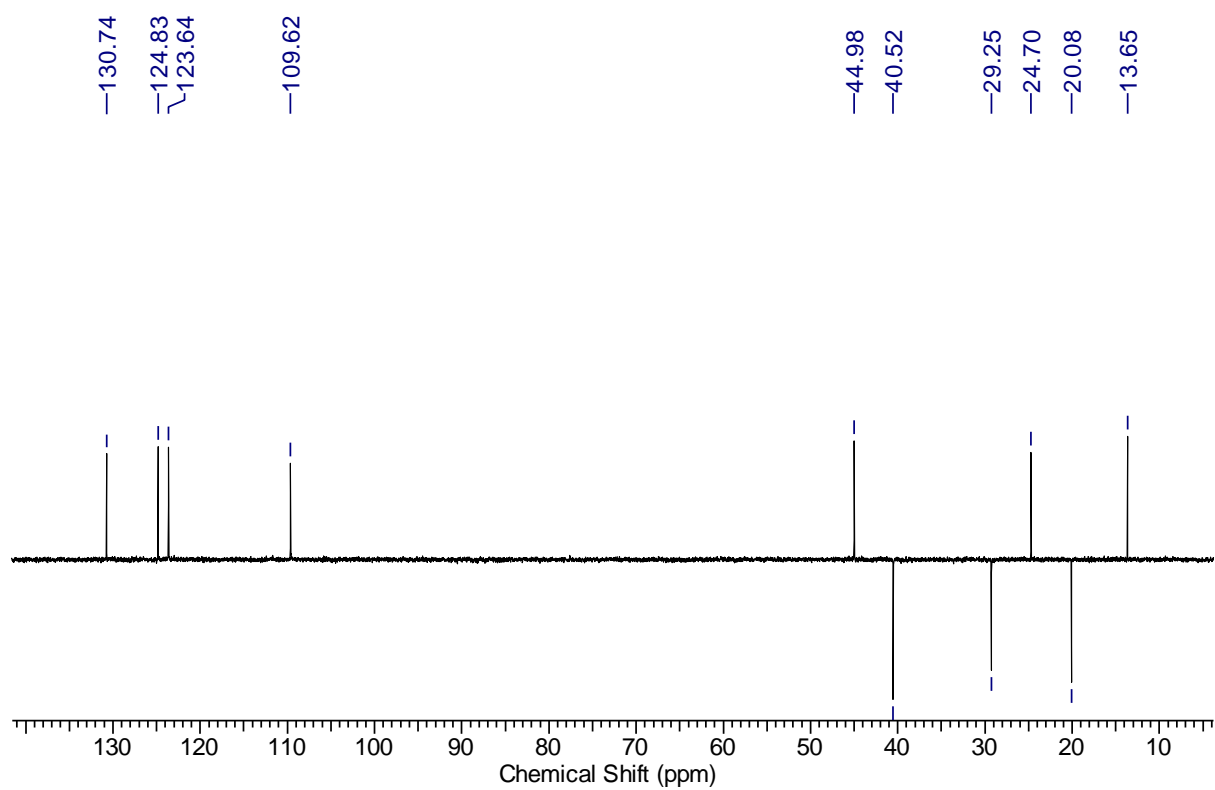

**<sup>1</sup>H NMR spectrum of compound 3C (400 MHz, CDCl<sub>3</sub>)**

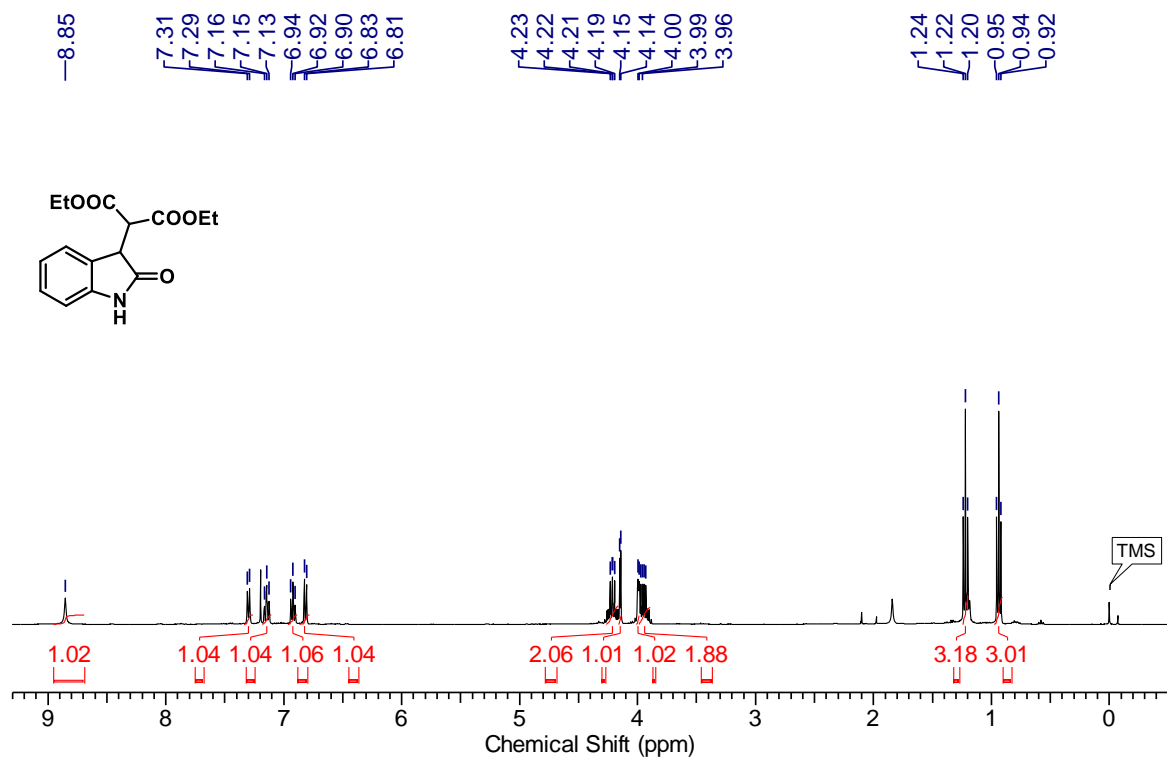

**<sup>13</sup>C NMR spectrum of compound 3C (101 MHz, CDCl<sub>3</sub>)**

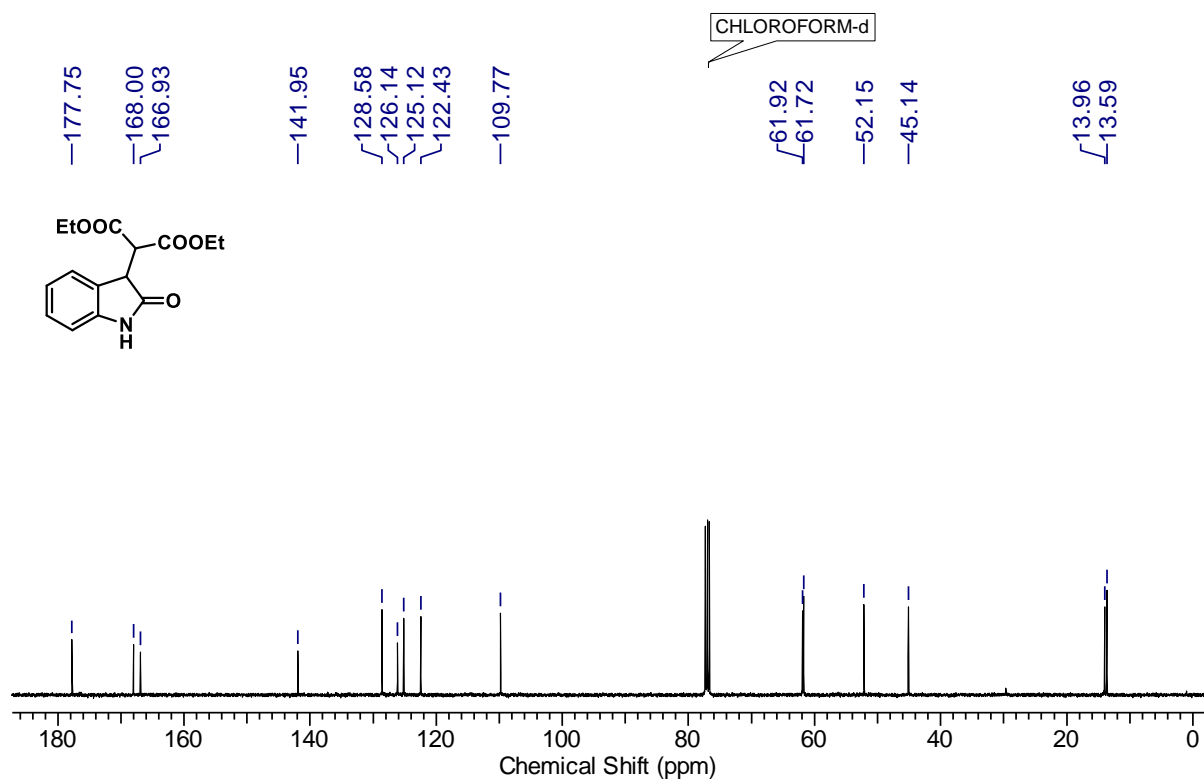

135 DEPT NMR spectrum of compound 3C

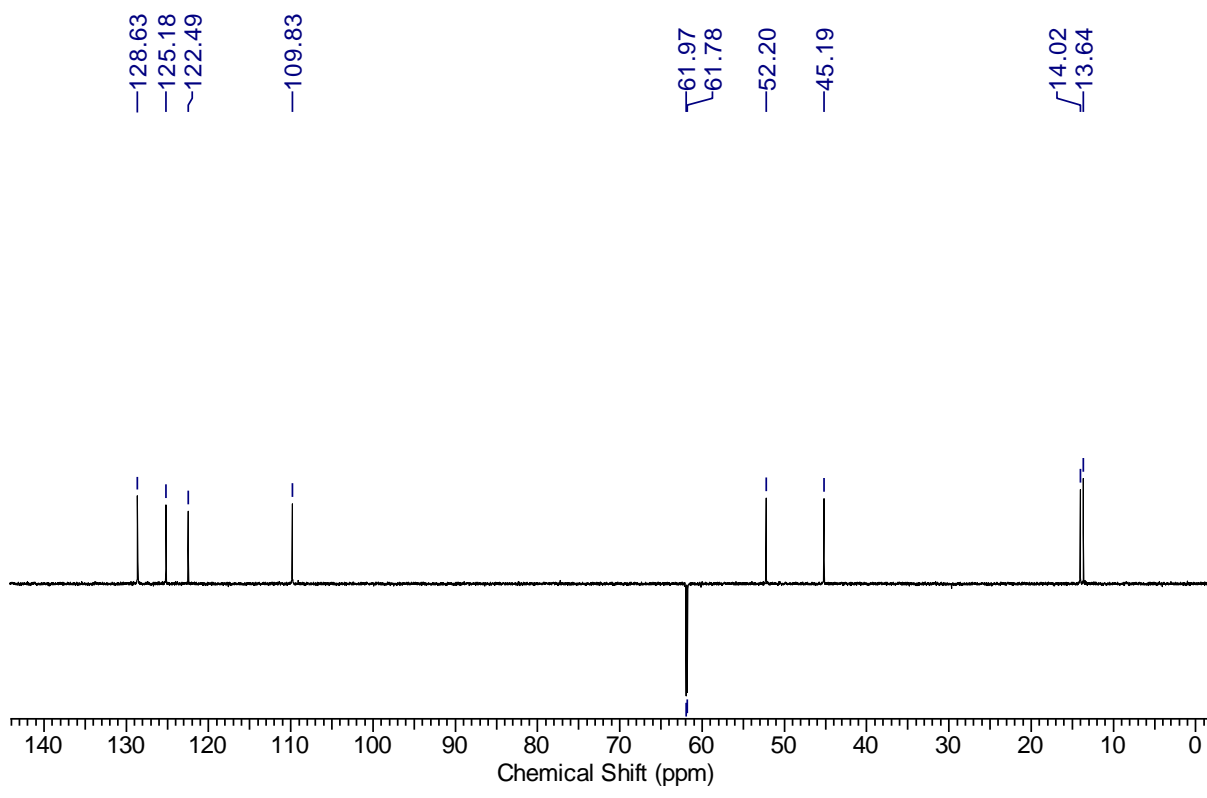

**<sup>1</sup>H NMR spectrum of compound 3D (400 MHz, CDCl<sub>3</sub>)**

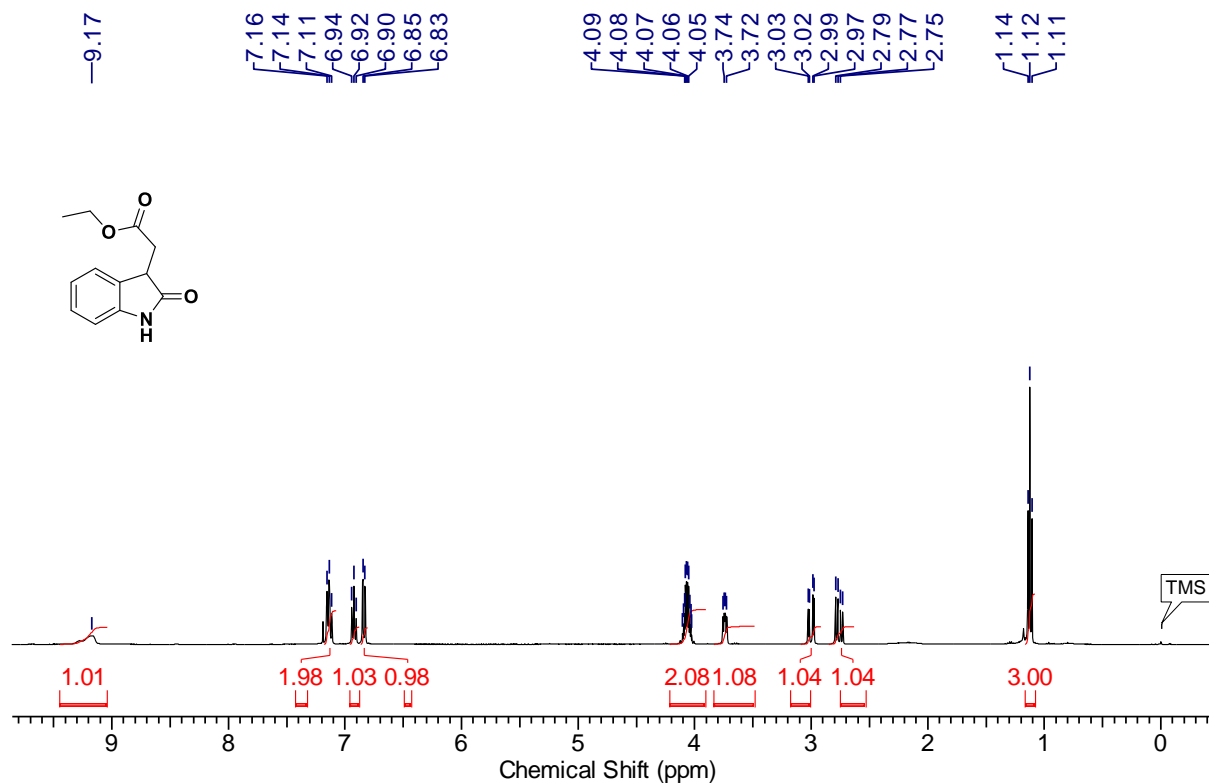

**<sup>13</sup>C NMR spectrum of compound 3D (101 MHz, CDCl<sub>3</sub>)**

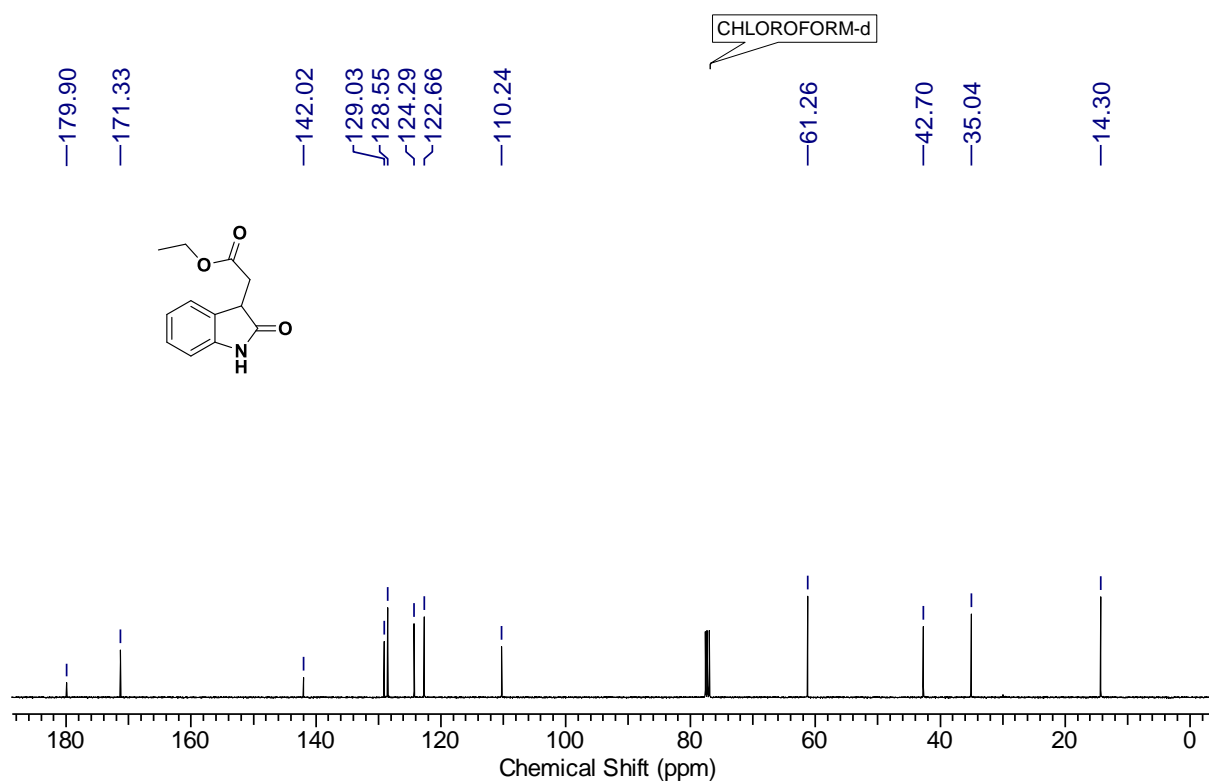

**135 DEPT NMR spectrum of compound 3D**

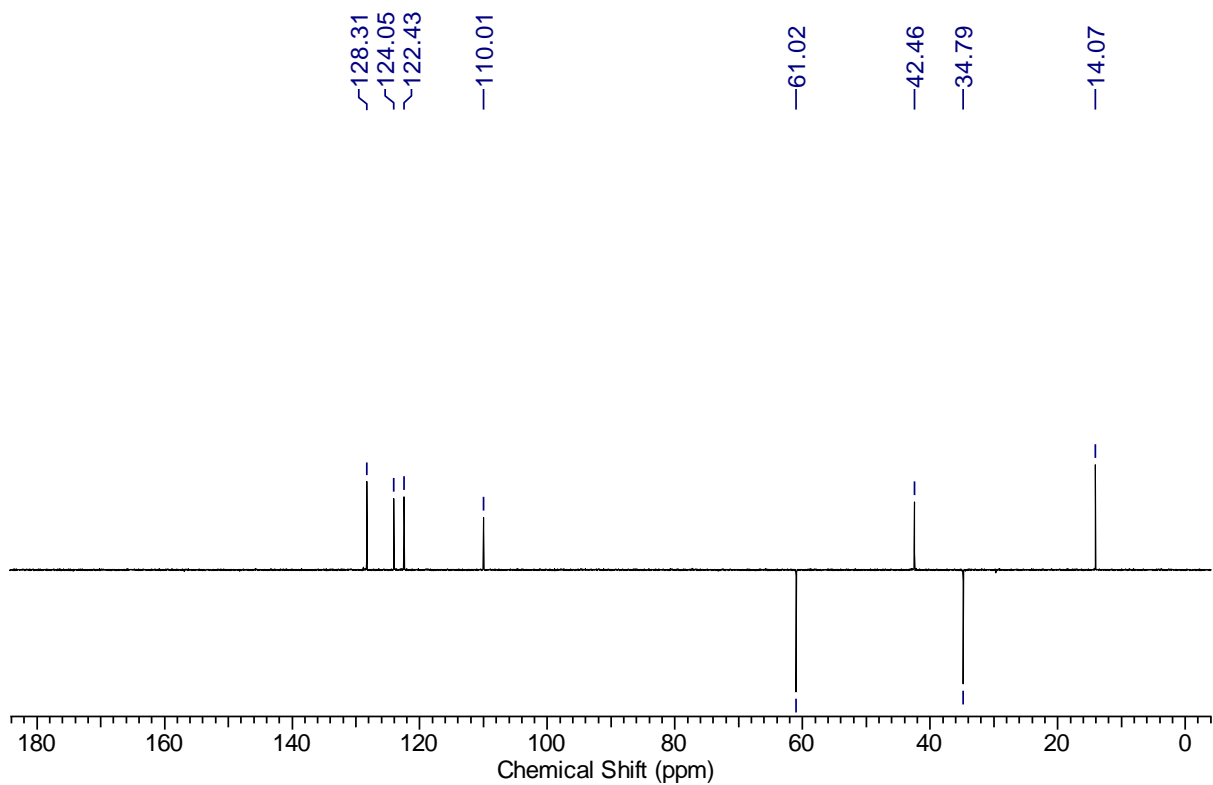

## Deuterium Scrambling Experiment:

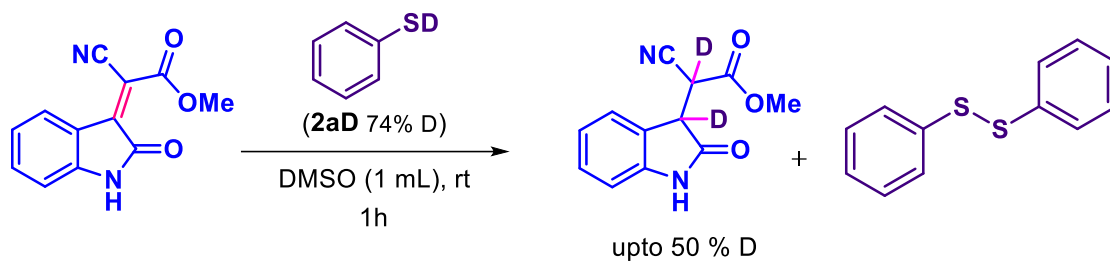

### NMR of crude product

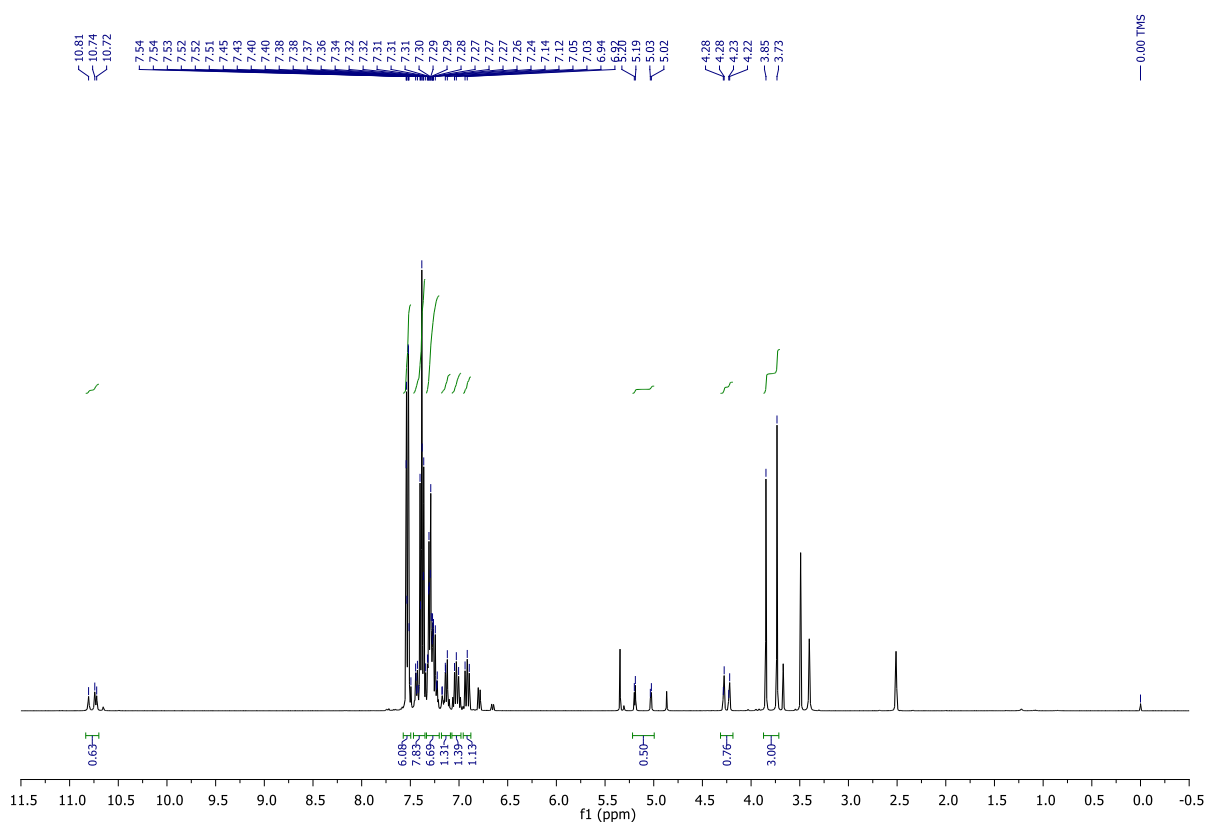

## 9. HRMS Spectral data.

### 3Aa

CA5 #379 RT: 1.69 AV: 1 NL: 2.04E9  
T: FTMS + p ESI Full ms [100.0000-1500.0000]

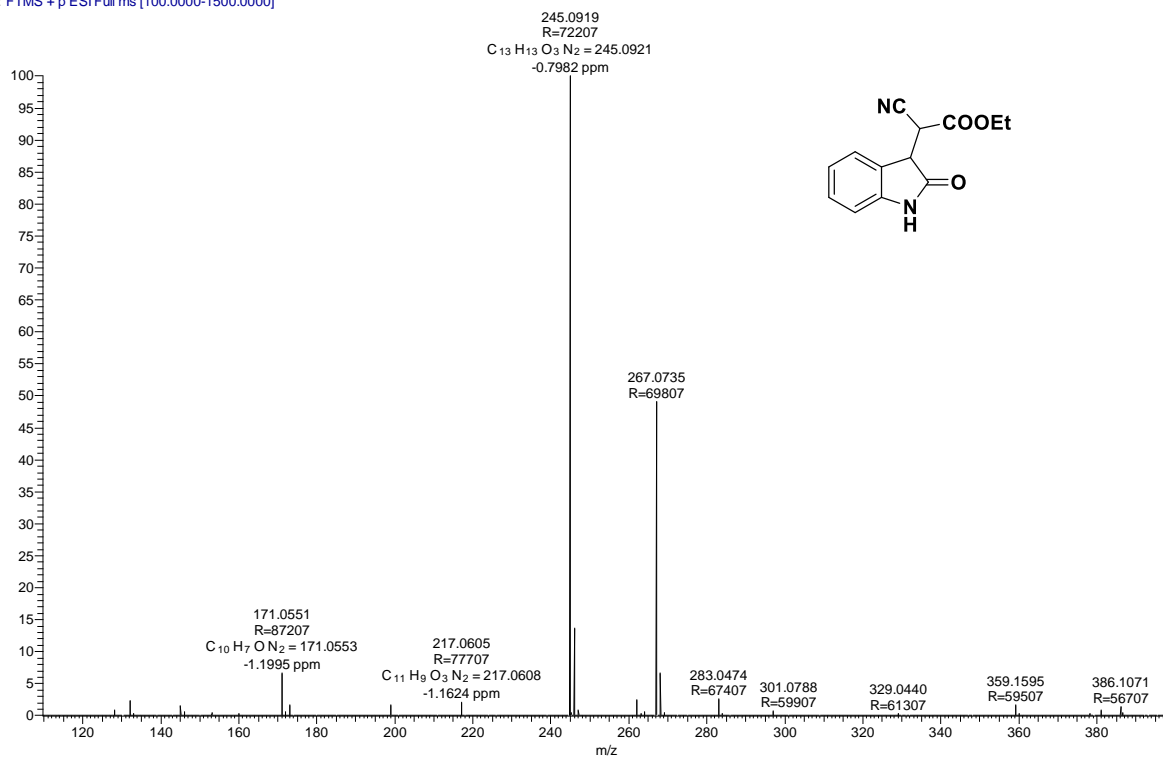

### 3Ab

CA-4 #279 RT: 1.56 AV: 1 NL: 3.47E9  
T: FTMS + p ESI Full ms [100.0000-1500.0000]

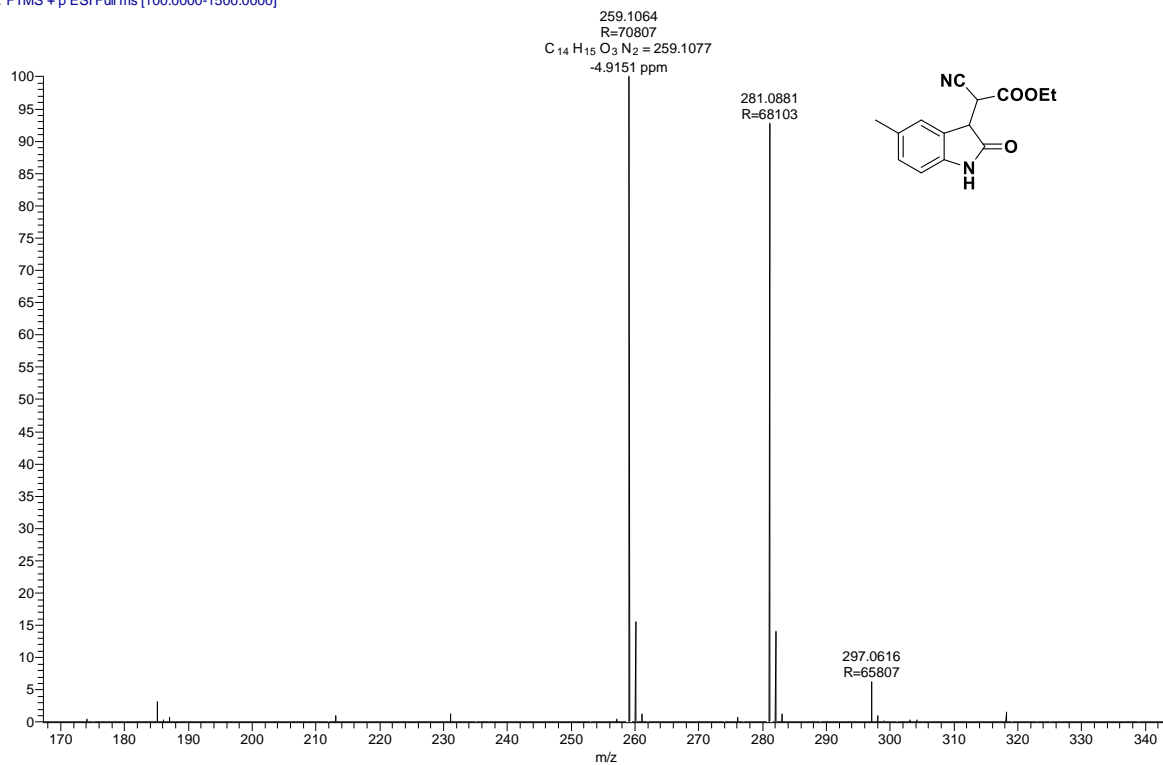

### 3Ac

CA-6 #280 RT: 1.56 AV: 1 NL: 3.55E9  
T: FTMS + p ESI Full ms [100.0000-1500.0000]

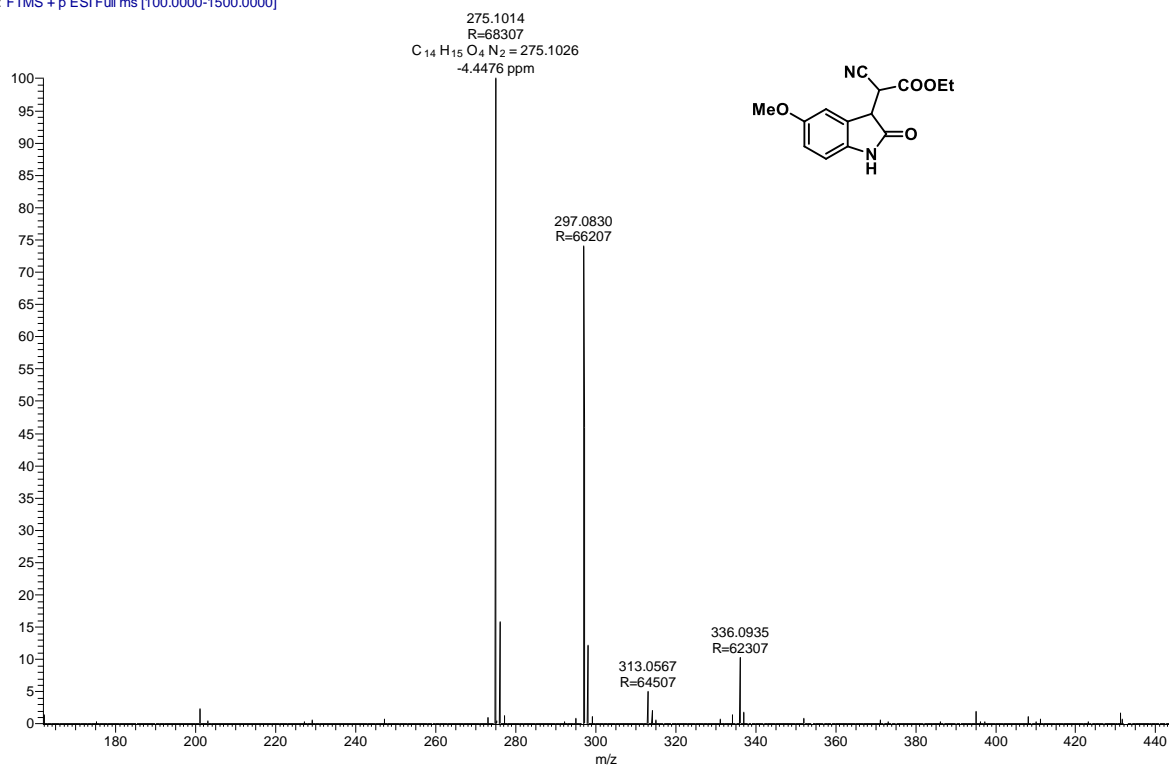

### 3Ad

5-7-Dime-CA #403 RT: 1.79 AV: 1 NL: 1.76E9  
T: FTMS + p ESI Full ms [100.0000-1500.0000]

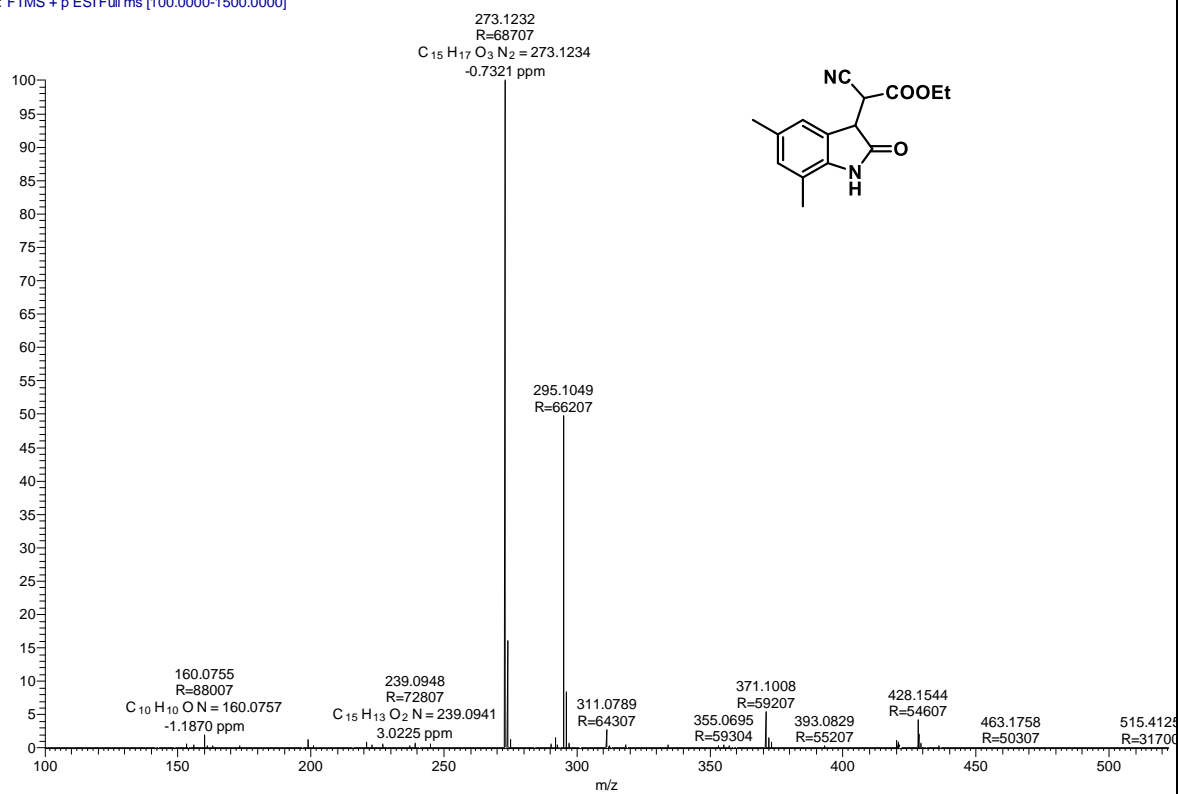

### 3Ae

5CICA #396 RT: 1.76 AV: 1 NL: 4.60E8  
T: FTMS + p ESI Full ms [100.0000-1500.0000]

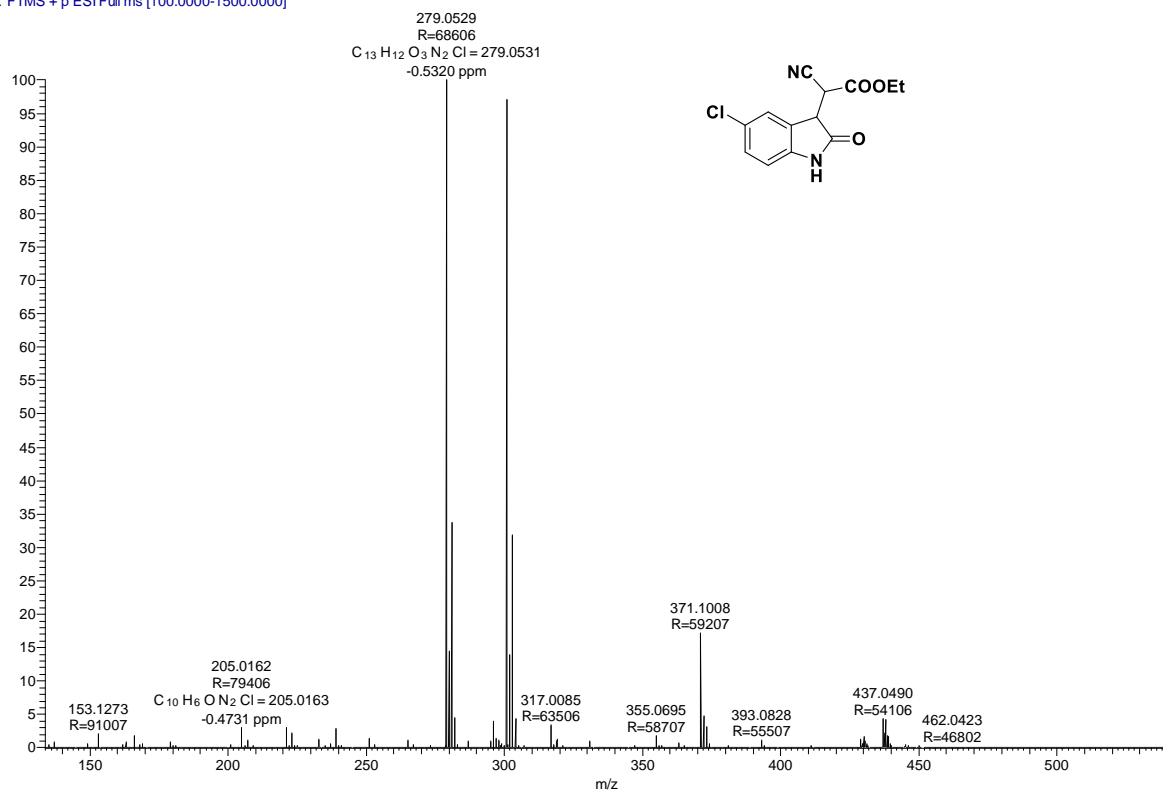

### 3Af

3AU #321 RT: 1.71 AV: 1 NL: 7.88E8  
T: FTMS + p ESI Full ms [100.0000-1500.0000]

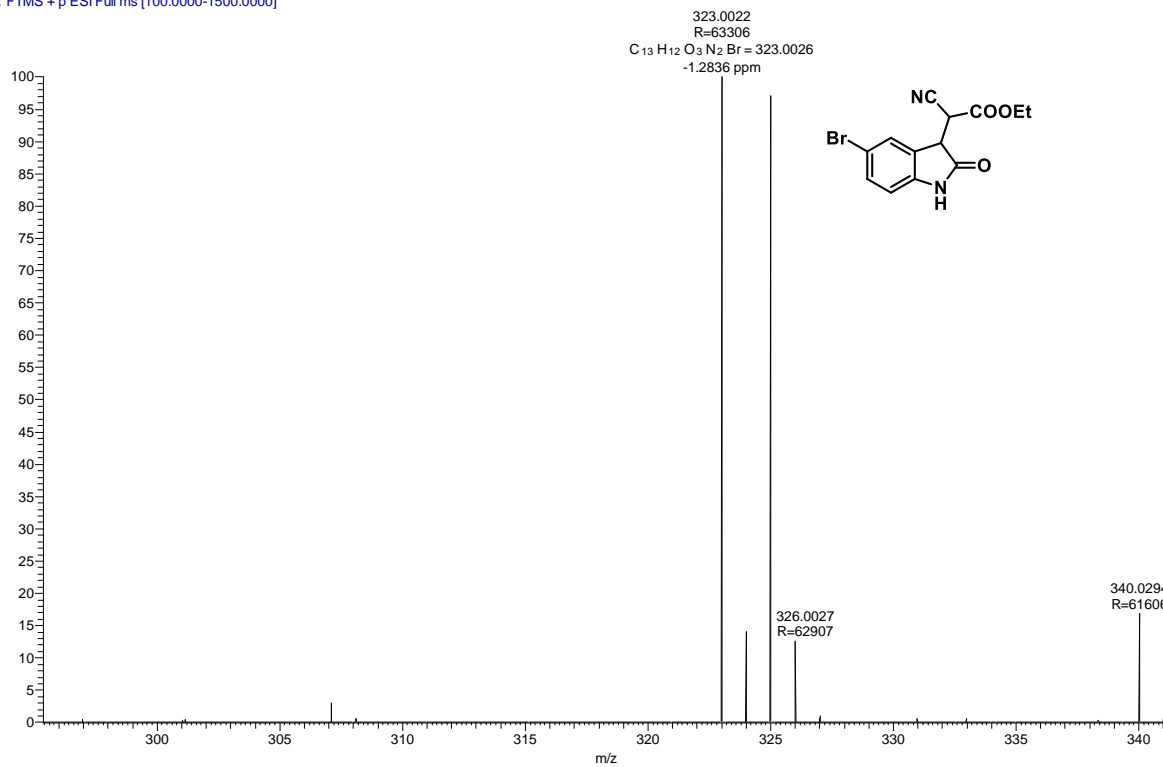

### 3Ag

3Ag #317 RT: 1.69 AV: 1 NL: 5.70E9  
T: FTMS + p ESI Full ms [100.0000-1500.0000]

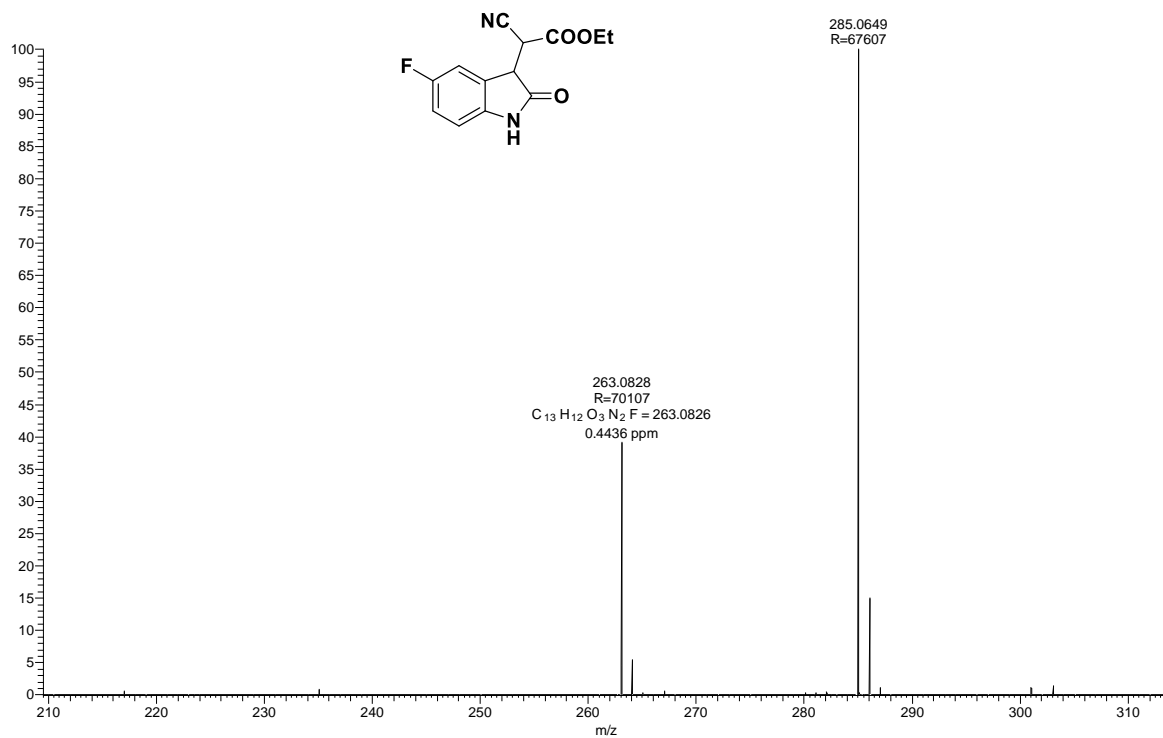

### 3Ah

3Ah #327 RT: 1.74 AV: 1 NL: 1.23E8  
T: FTMS + p ESI Full ms [100.0000-1500.0000]

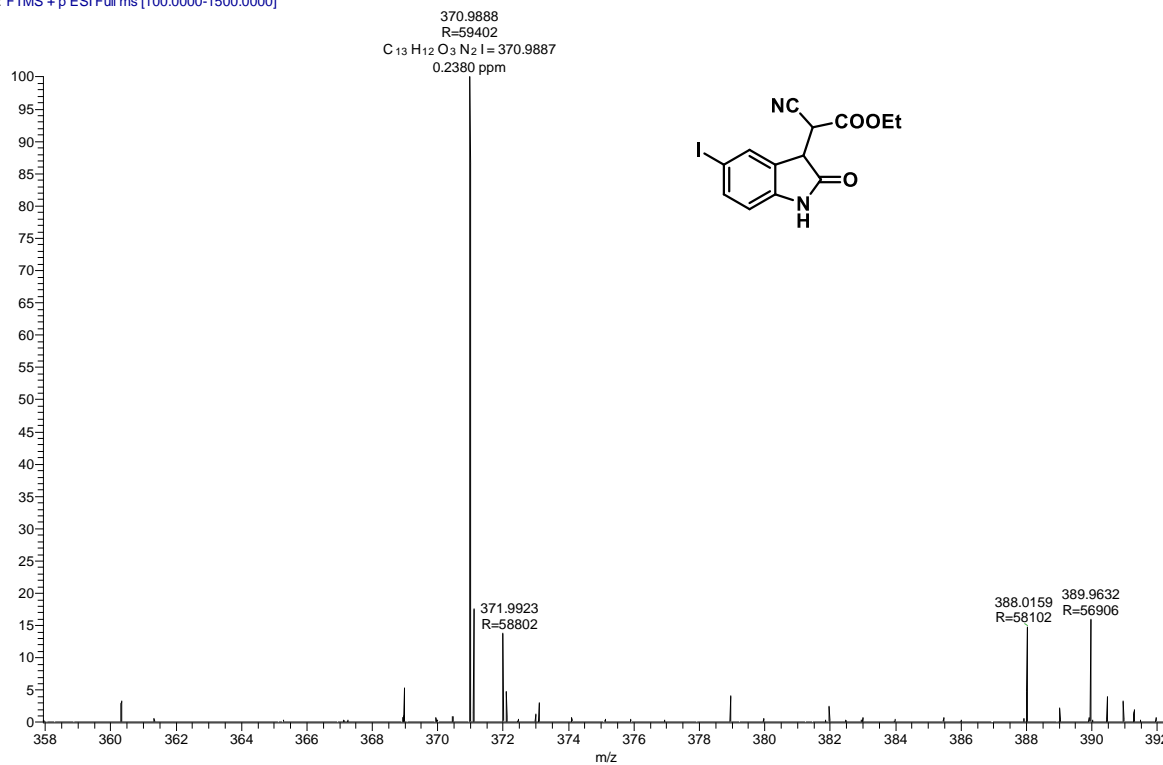

### 3Ai

CA-2 #299 RT: 1.66 AV: 1 NL: 2.35E9  
T: FTMS + p ESI Full ms [100.0000-1500.0000]

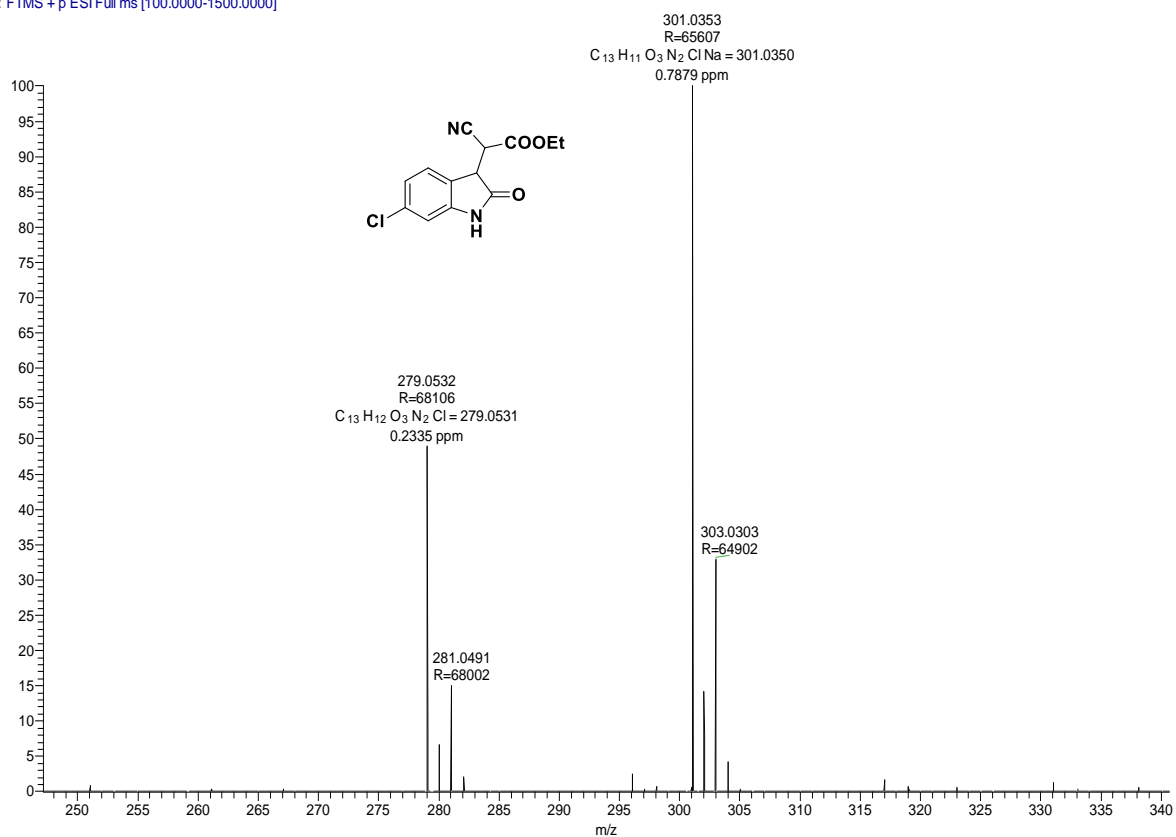

### 3Aj

3AJ #347 RT: 1.84 AV: 1 NL: 6.87E8  
T: FTMS + p ESI Full ms [100.0000-1500.0000]

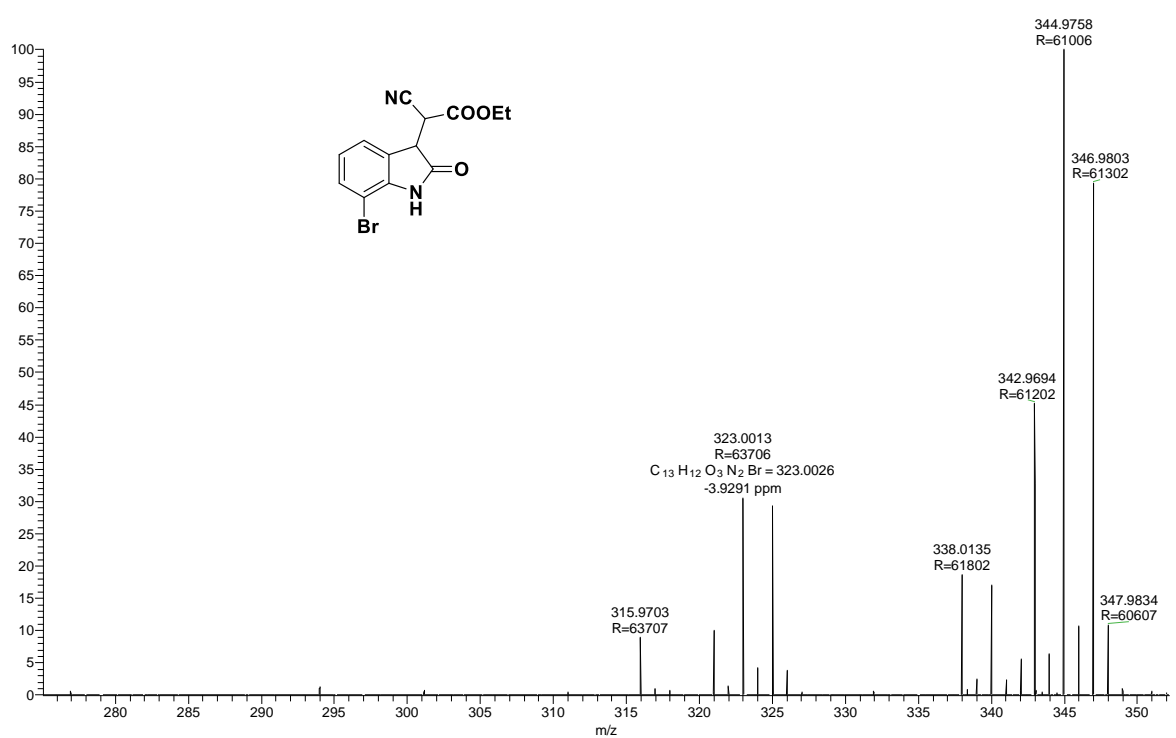

### 3Ak

3AK #316 RT: 1.68 AV: 1 NL: 1.60E9  
T: FTMS + p ESI Full ms [100.0000-1500.0000]

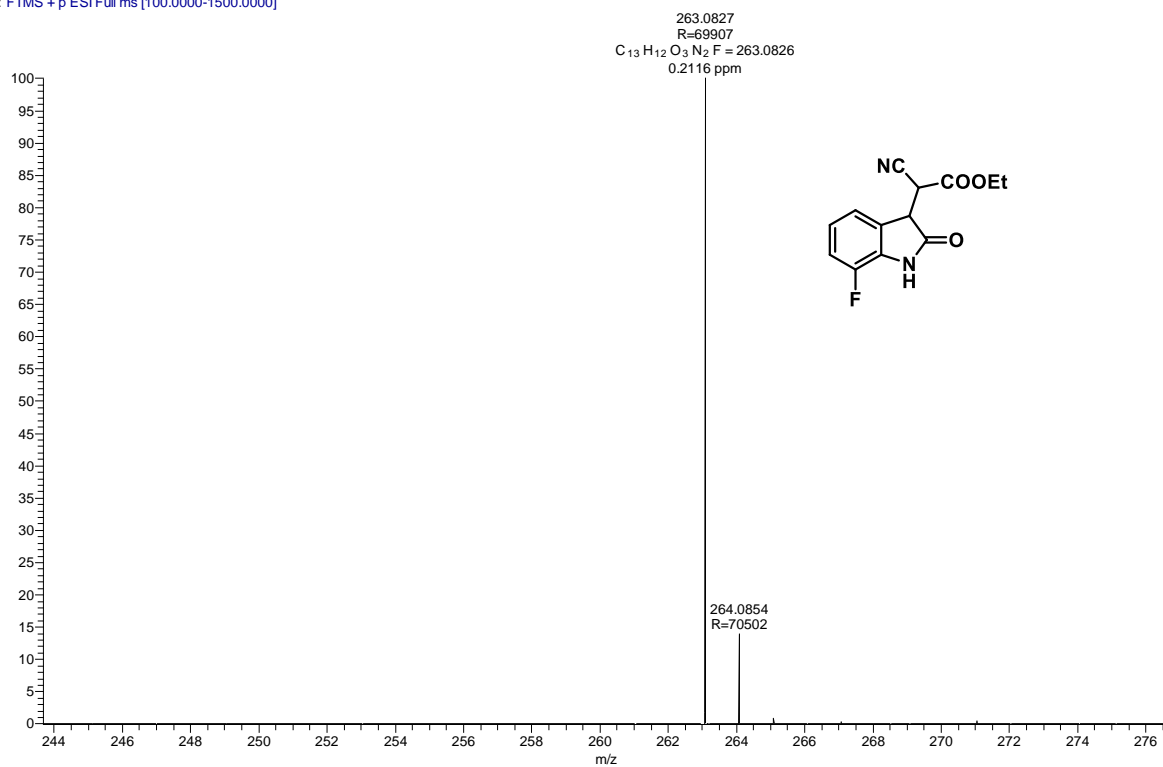

### 3AI

CA-2 #299 RT: 1.66 AV: 1 NL: 2.35E9  
T: FTMS + p ESI Full ms [100.0000-1500.0000]

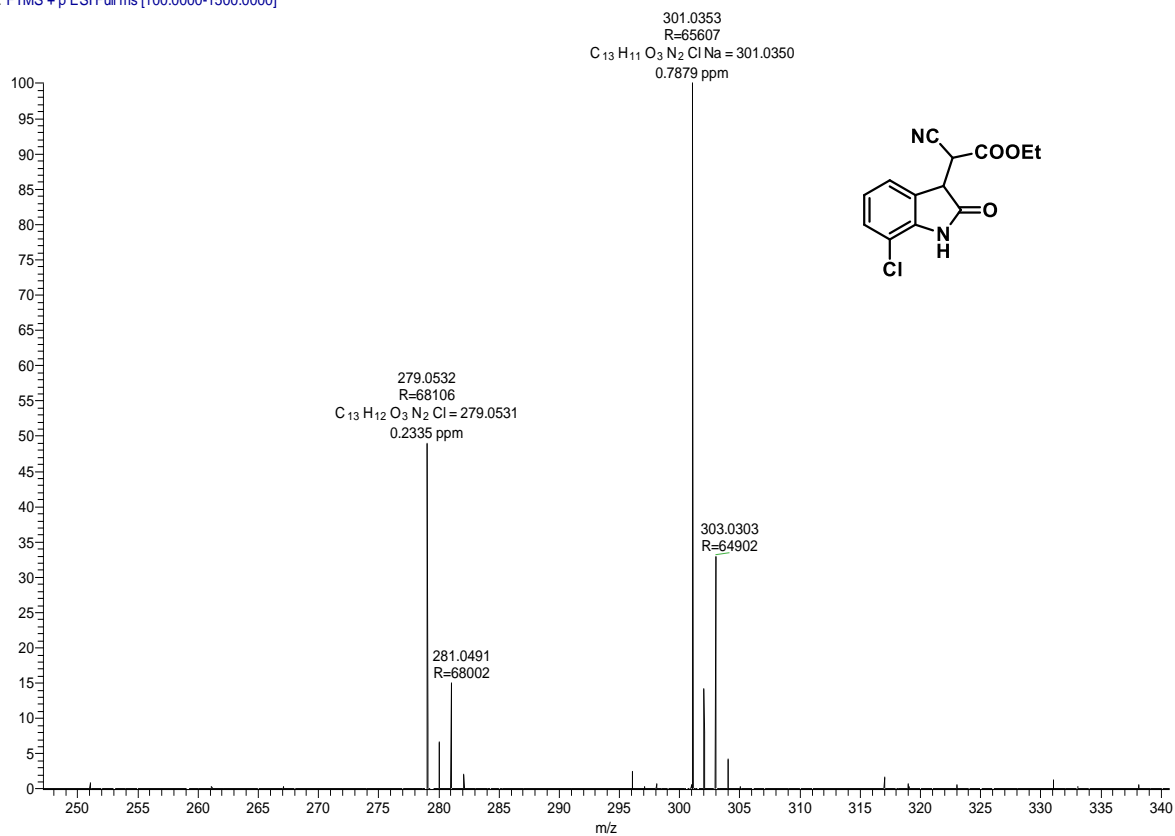

### 3Am

CA-7 #423 RT: 2.25 AV: 1 NL: 2.38E8  
T: FTMS + p ESI Full ms [100.0000-1500.0000]

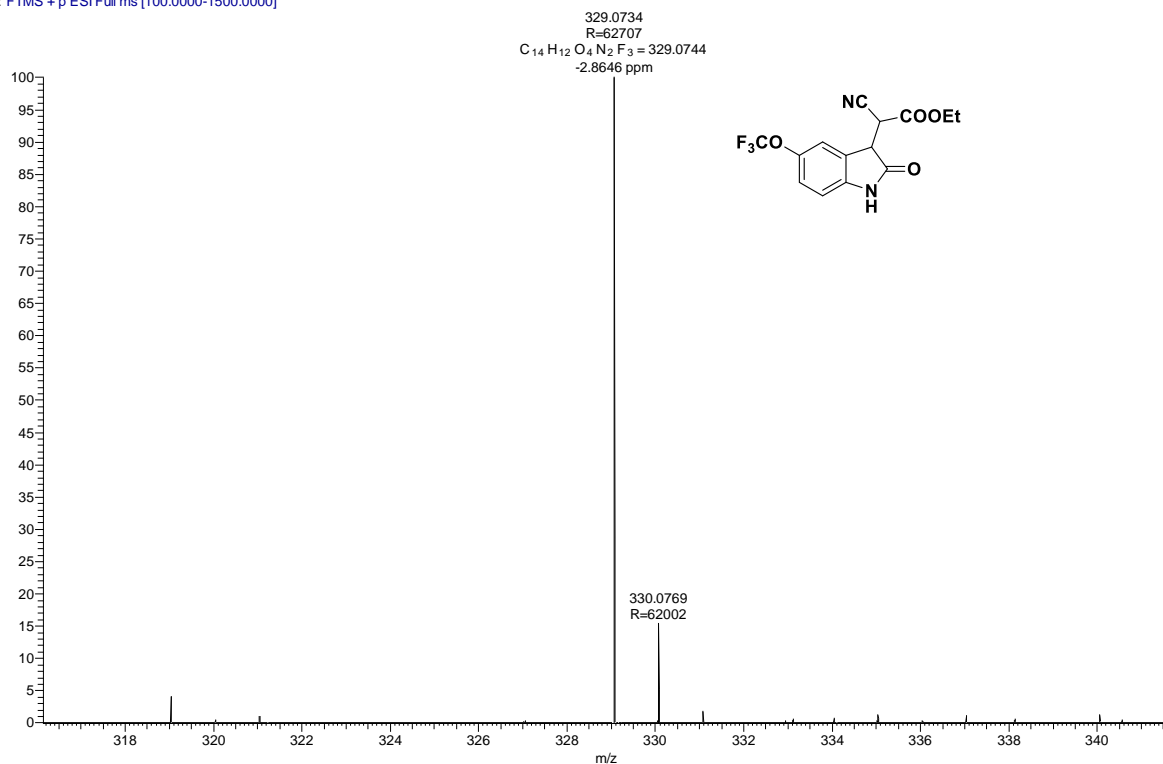

### 3An

CA-10 #413 RT: 2.20 AV: 1 NL: 5.05E8  
T: FTMS + p ESI Full ms [100.0000-1500.0000]

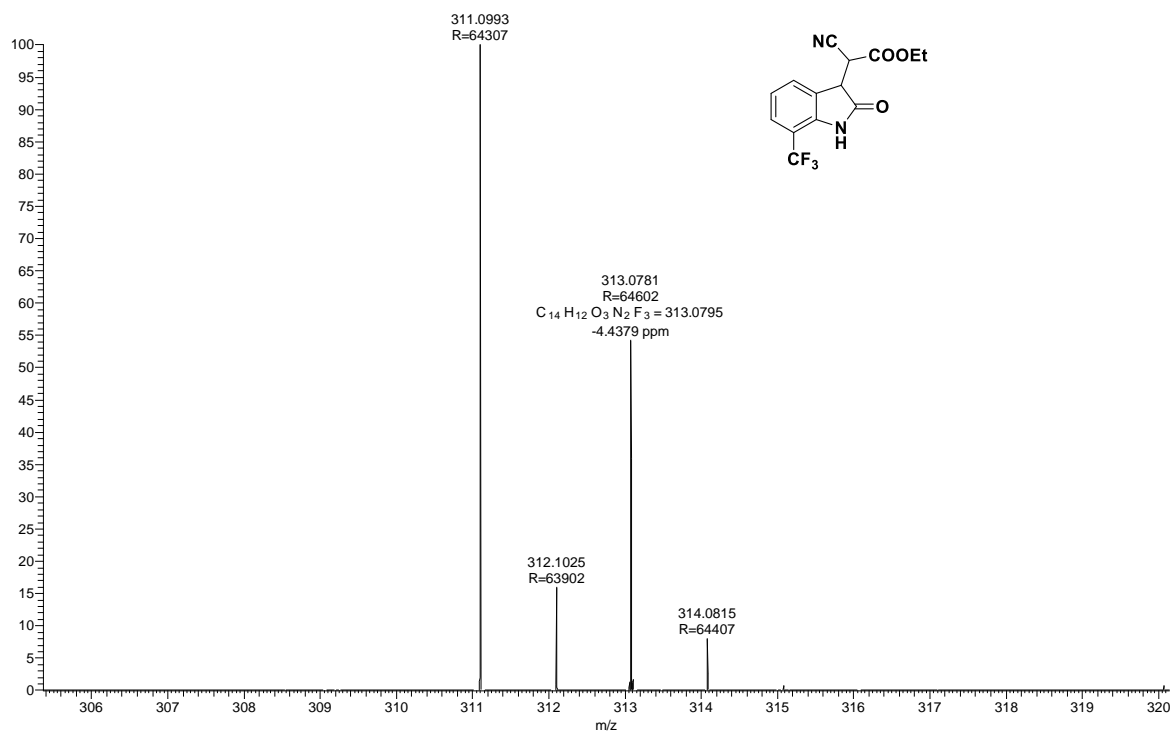

### 3Ao

BE-2 #307 RT: 1.63 AV: 1 NL: 3.07E9  
T: FTMS + p ESI Full ms [100.0000-1500.0000]

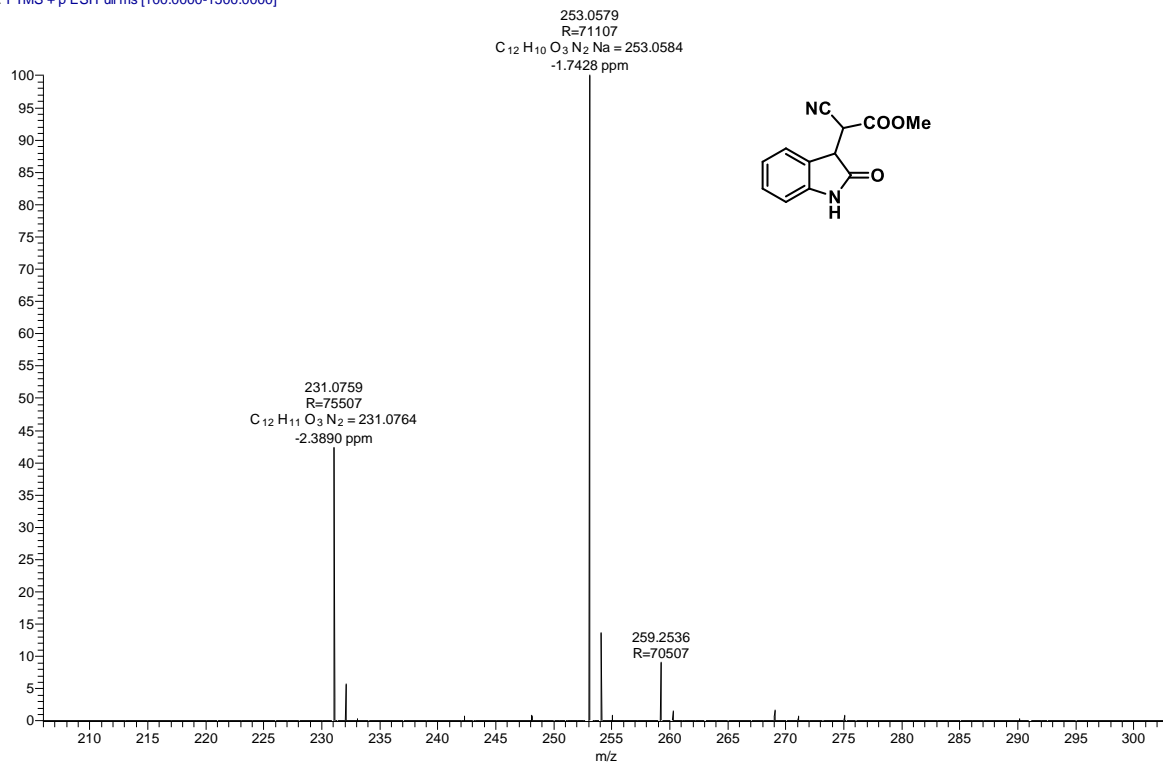

### 3Ap

5MCCA #389 RT: 1.73 AV: 1 NL: 1.87E9  
T: FTMS + p ESI Full ms [100.0000-1500.0000]

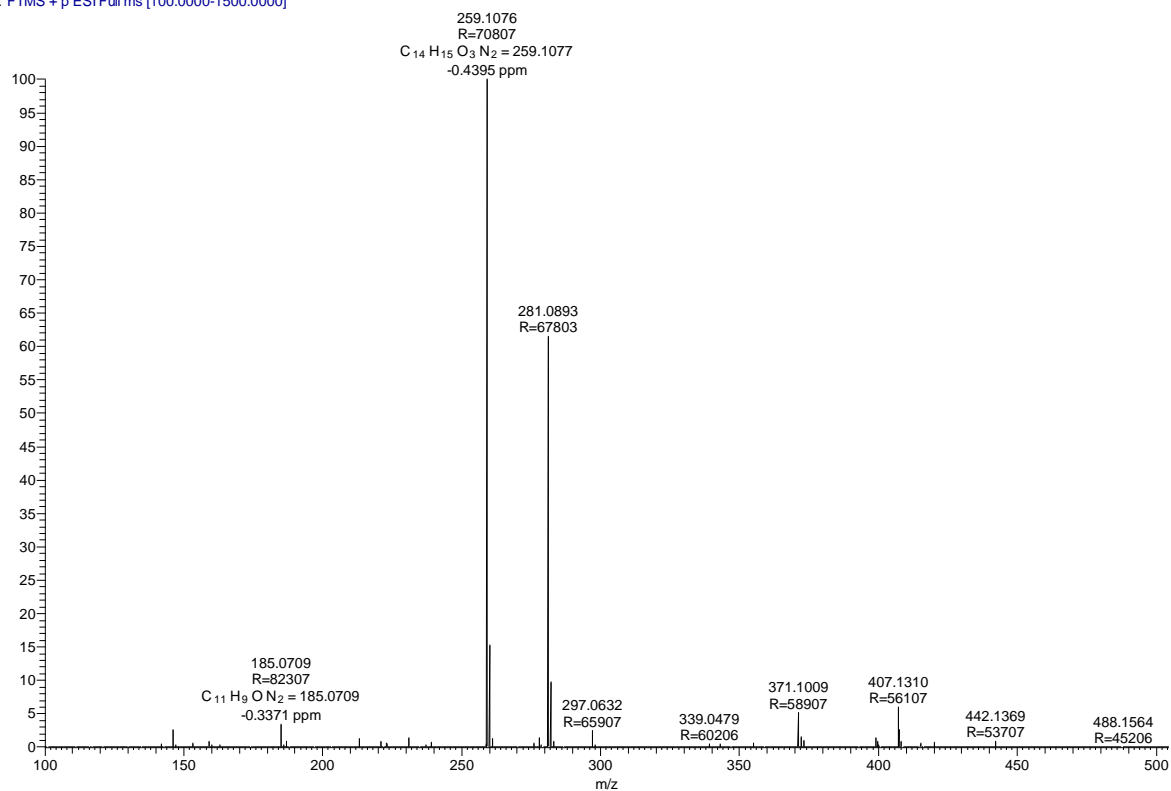

### 3Aq

CA-9 #408 RT: 2.17 AV: 1 NL: 2.36E9  
T: FTMS + p ESI Full ms [100.0000-1500.0000]

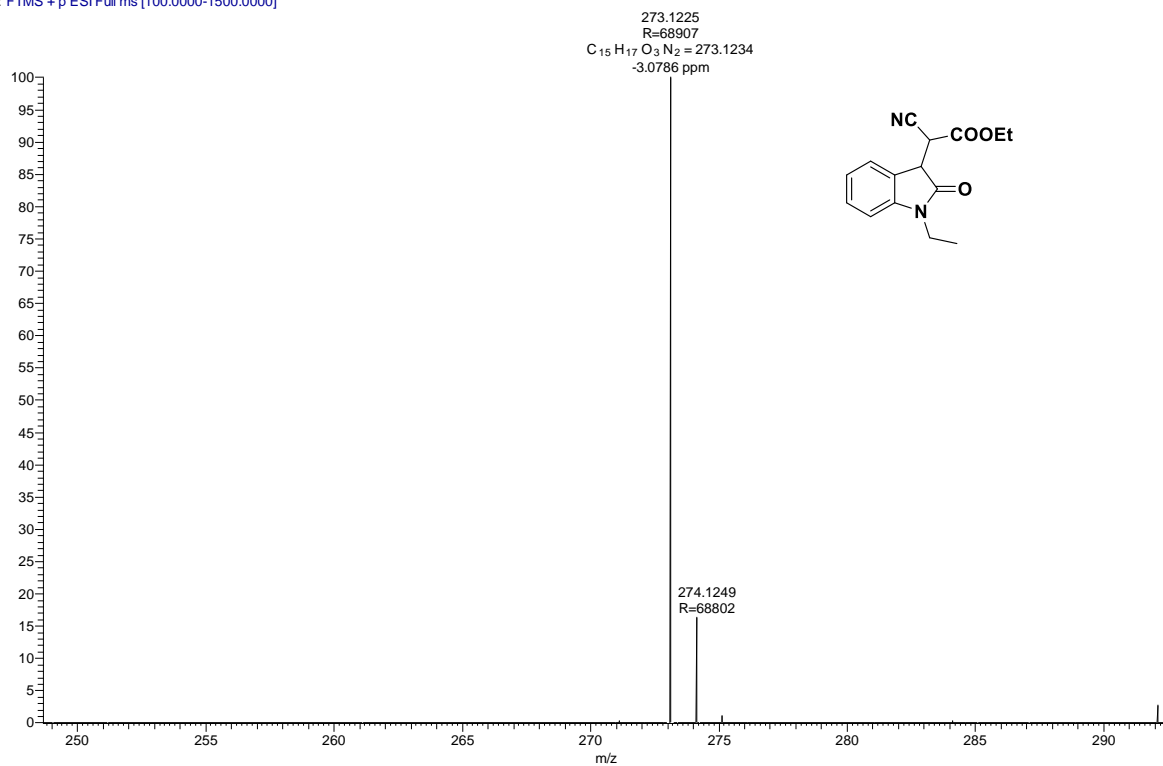

### 3Ar

3AE #335 RT: 1.78 AV: 1 NL: 5.96E9  
T: FTMS + p ESI Full ms [100.0000-1500.0000]

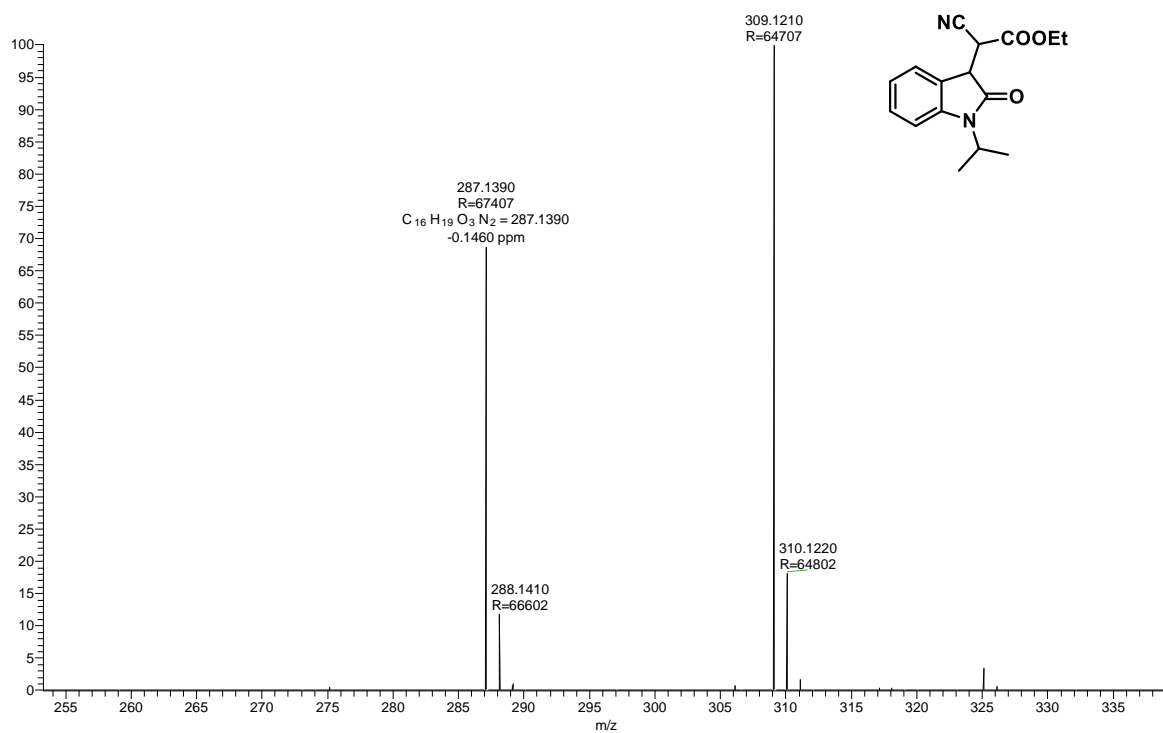

### 3As

3AS #323 RT: 1.72 AV: 1 NL: 5.43E9  
T: FTMS + p ESI Full ms [100.0000-1500.0000]

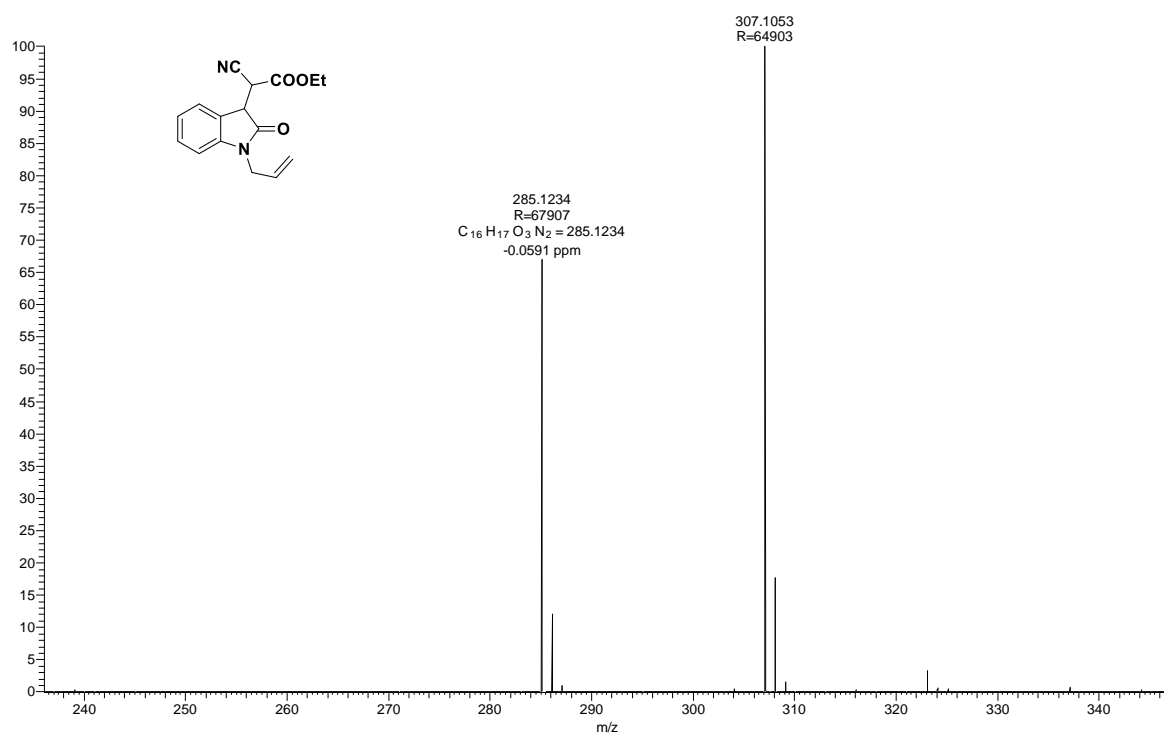

### 3At

3AT #317 RT: 1.69 AV: 1 NL: 6.29E9  
T: FTMS + p ESI Full ms [100.0000-1500.0000]

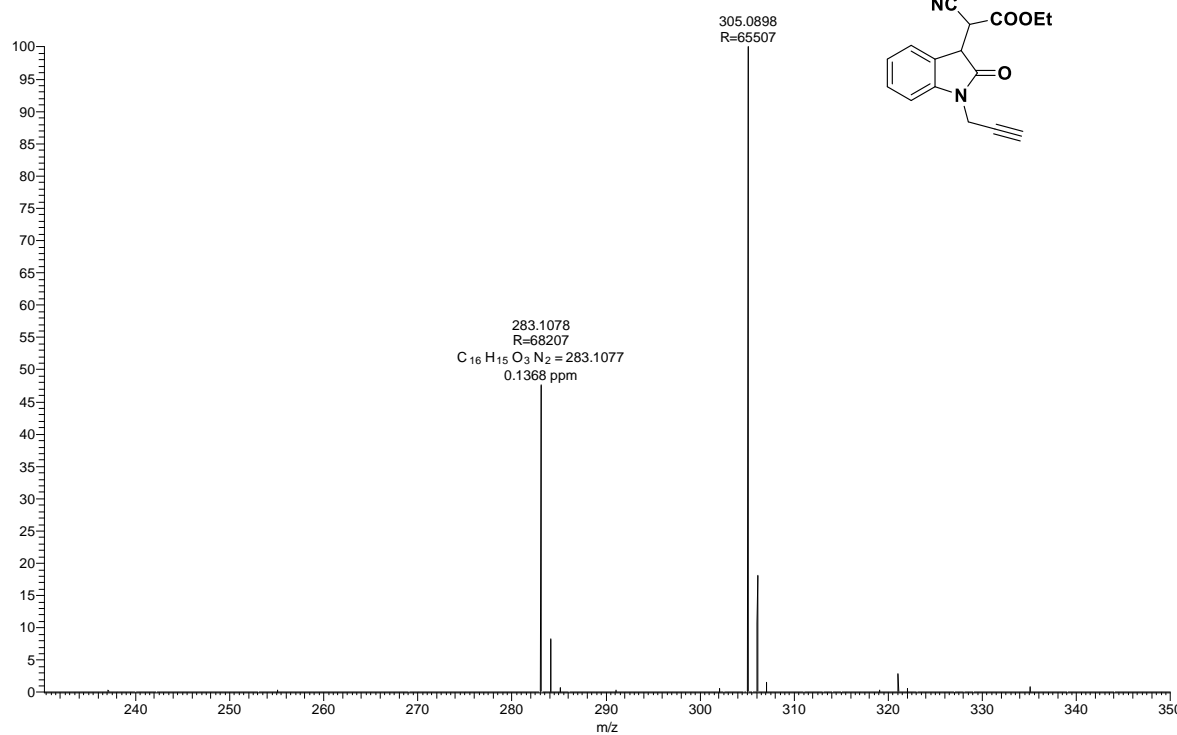

### 3Av

CA-3 #283 RT: 1.58 AV: 1 NL: 2.63E9  
T: FTMS + p ESI Full ms [100.0000-1500.0000]

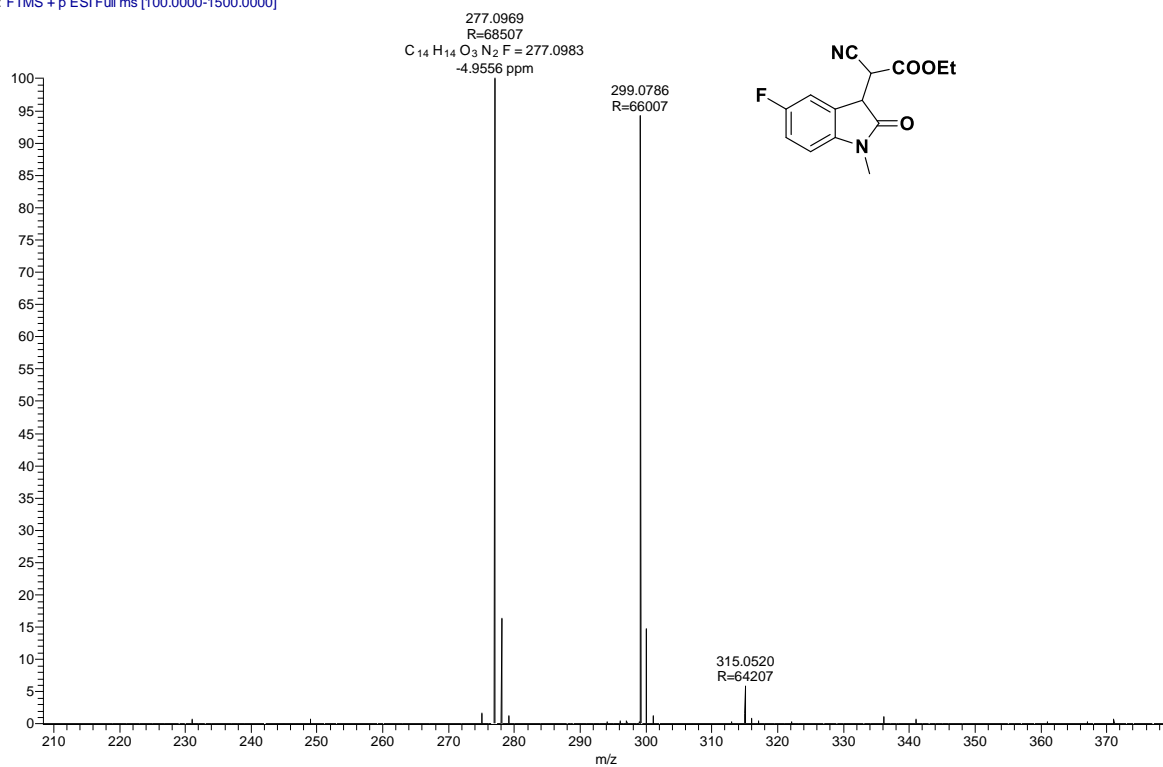

### 3Aw

CA-5 #292 RT: 1.63 AV: 1 NL: 6.47E9  
T: FTMS + p ESI Full ms [100.0000-1500.0000]

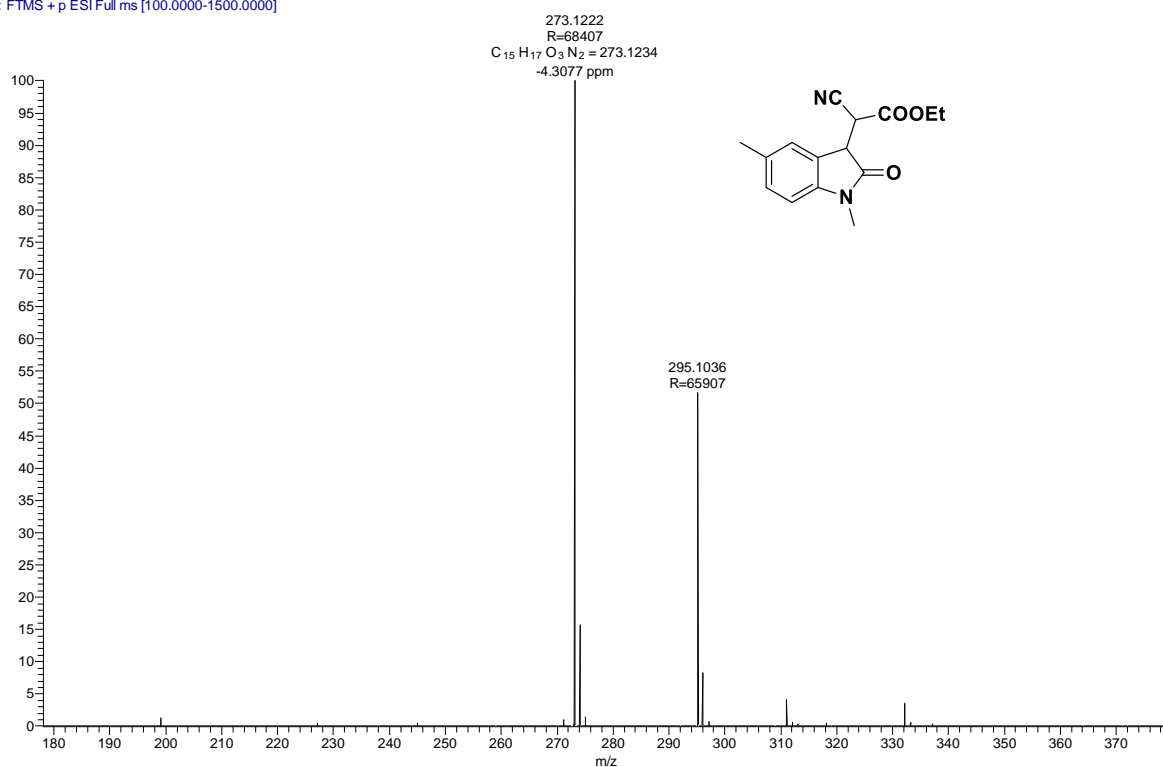

### 3Ax

BE-1 #314 RT: 1.66 AV: 1 NL: 2.57E9  
T: FTMS + p ESI Full ms [100.0000-1500.0000]

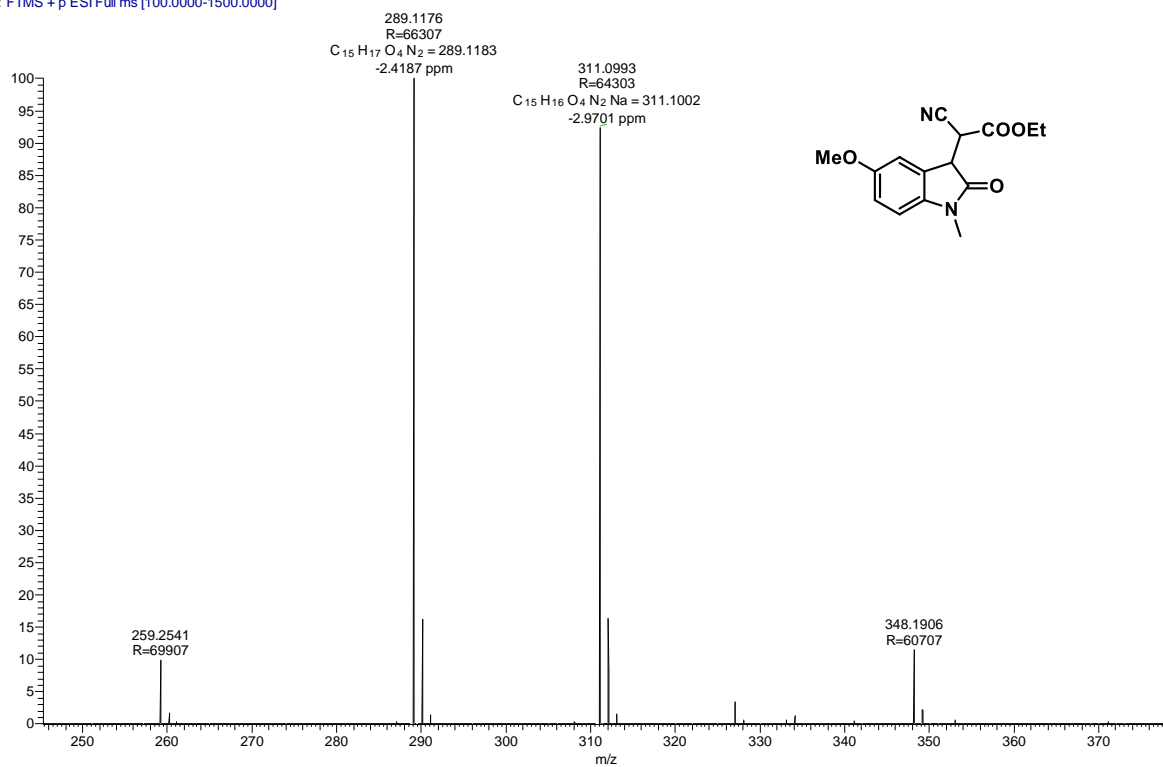

### 3Ay

CA-8 #424 RT: 2.26 AV: 1 NL: 1.94E9  
T: FTMS + p ESI Full ms [100.0000-1500.0000]

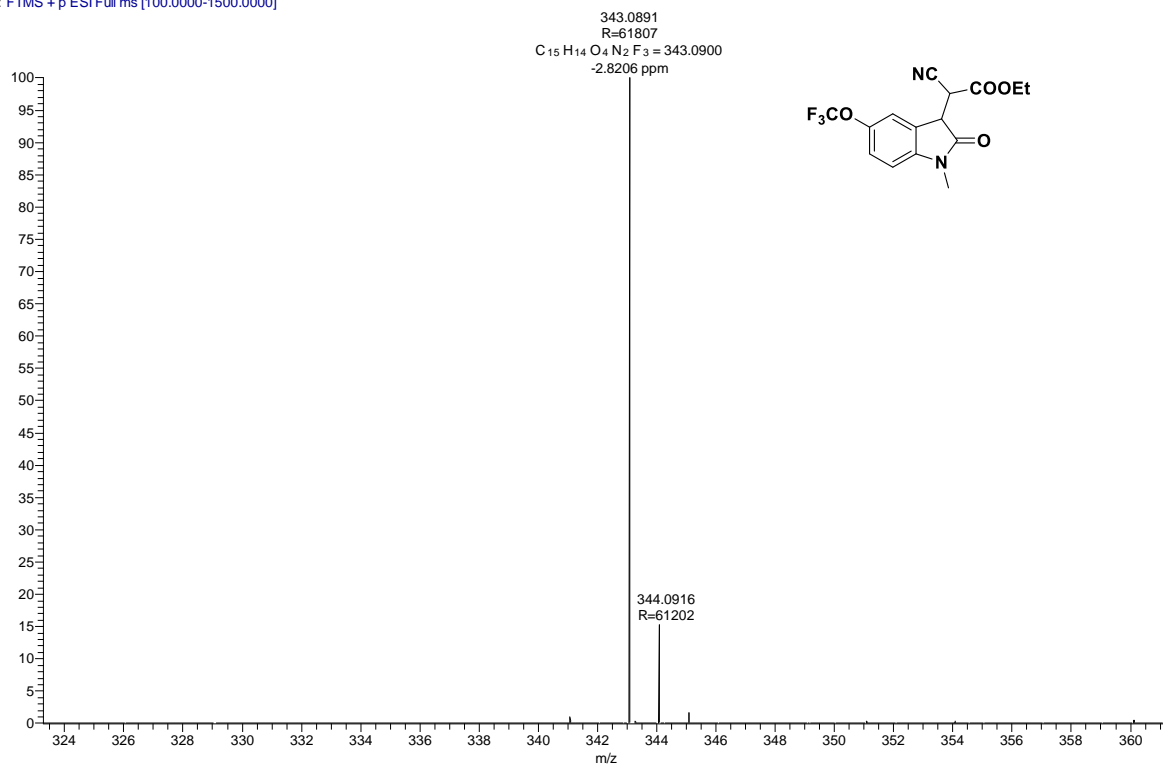

### 3B

3B #315 RT: 1.68 AV: 1 NL: 3.22E6  
T: FTMS + p ESI Full ms [100.0000-1500.0000]

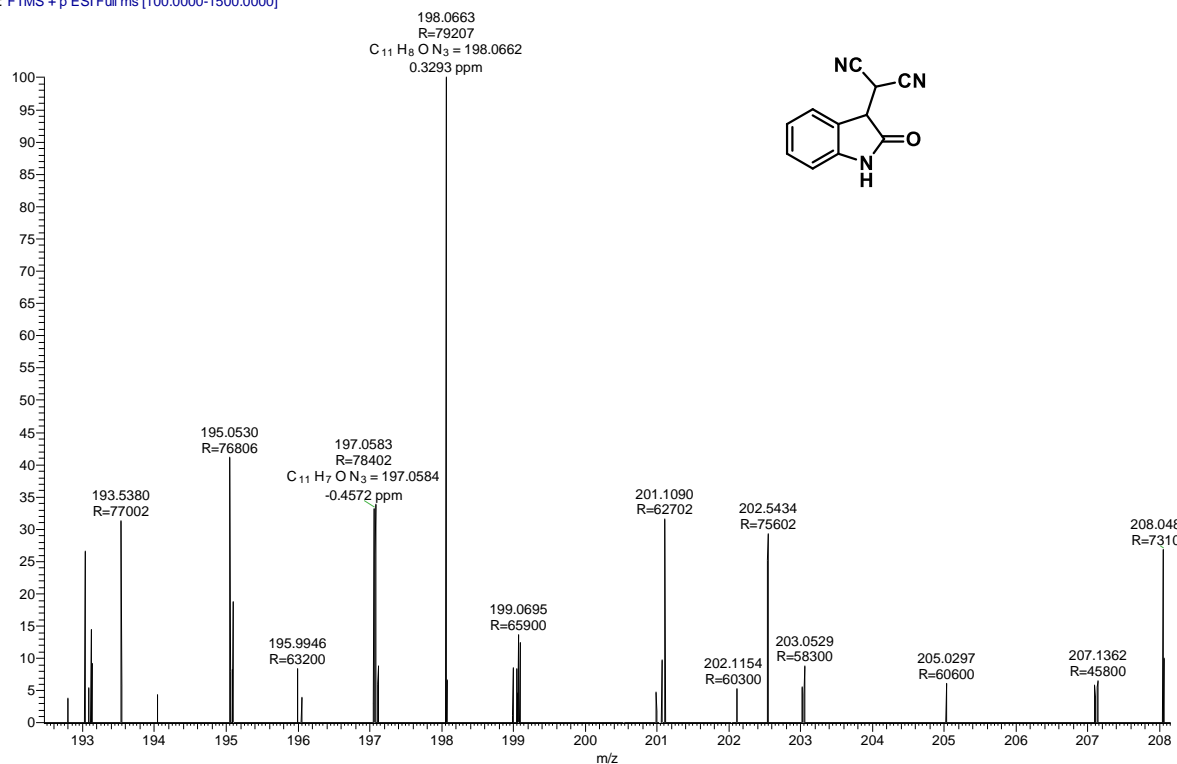

### 3Bb

CA2 #401 RT: 1.79 AV: 1 NL: 5.48E8  
T: FTMS + p ESI Full ms [100.0000-1500.0000]

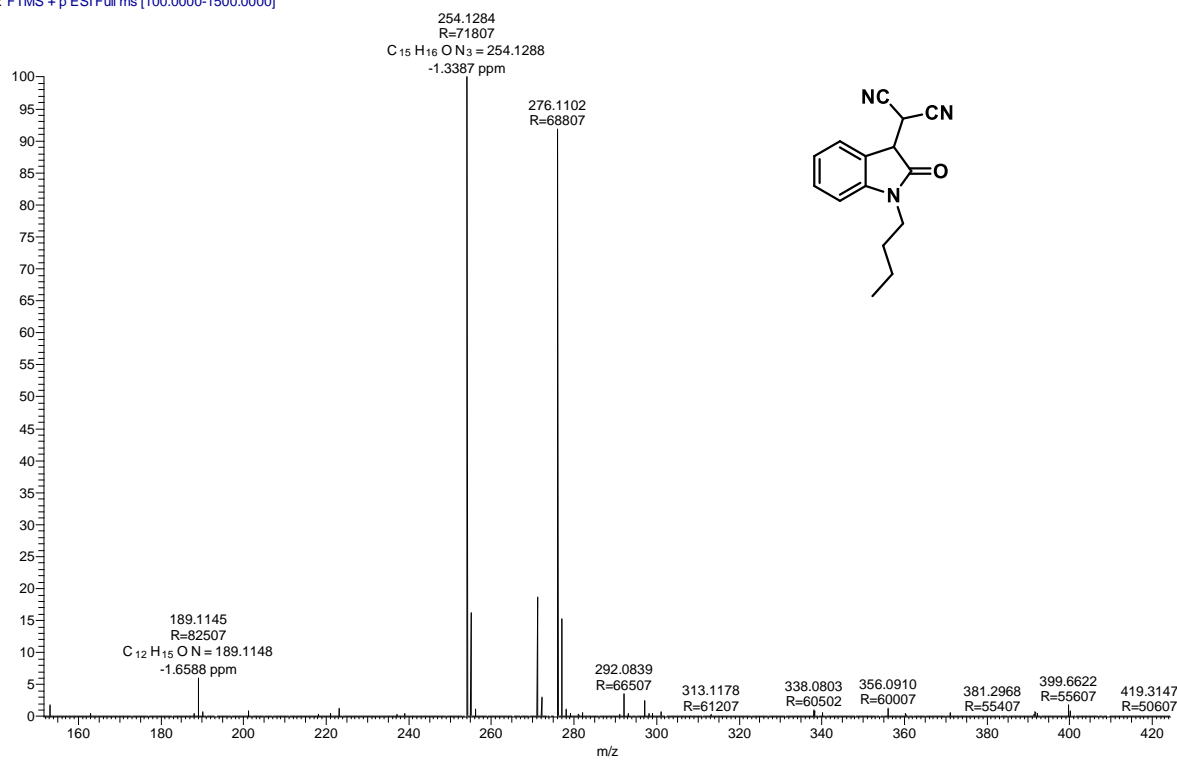

### 3C

CA6 #405 RT: 1.81 AV: 1 NL: 3.92E9  
T: FTMS + p ESI Full ms [100.0000-1500.0000]

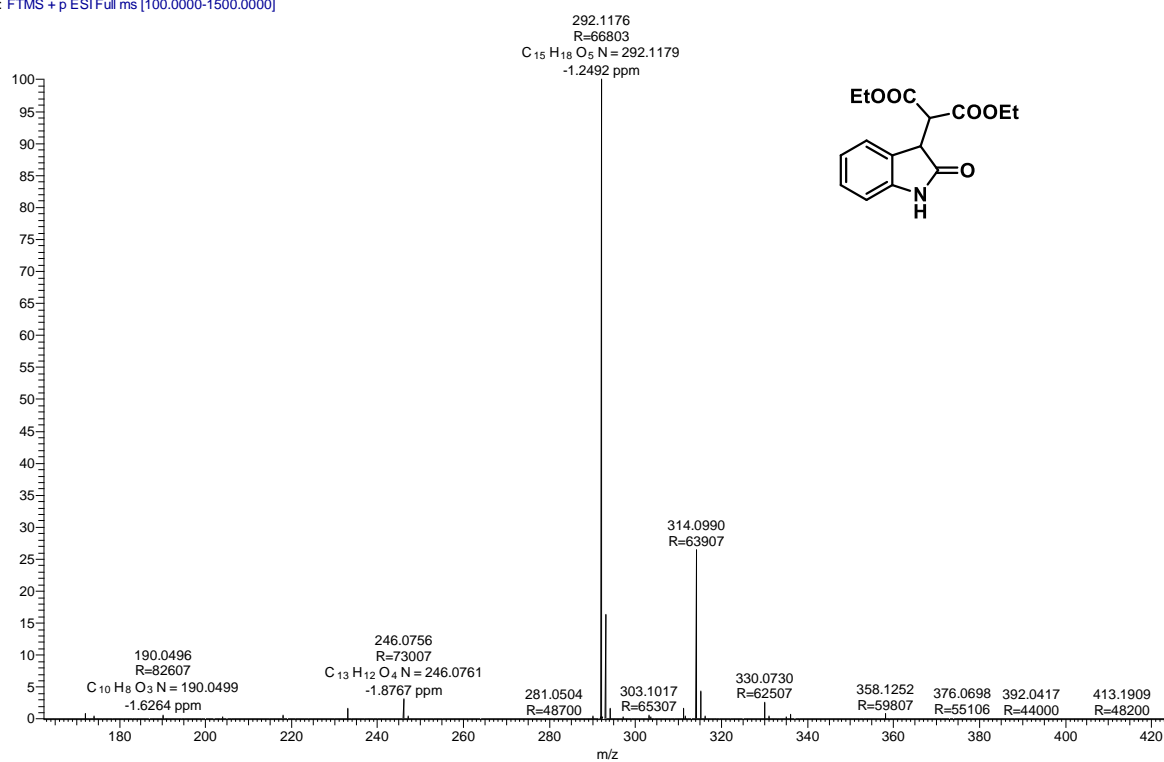

Supplement: d5ra09175f1.pdf [file d5ra09175f1.pdf]
